# Supplementary material for: A microtranslatome coordinately regulates sodium and potassium currents in the human heart
Source: eLife. 2019 Oct 31;8:e52654. doi: 10.7554/eLife.52654 (PMC6867827; doi:10.7554/eLife.52654)
Supplement: Figure 2—figure supplement 2—source data 1. [file elife-52654-fig2-figsupp2-data1.xlsx]

## Sheet: Figure 2 supplement 2a
	Intensities		Total # particle		frequence
	27293		2611	0	0
	28638.4			20000	0
	29840.2			40000	18
	31238.4			60000	89
	31498			80000	100
	31878.9			100000	112
	32428.1			120000	114
	34408			140000	108
	35337.2			160000	115
	35544			180000	107
	37744.6			200000	95
	38039.7			220000	99
	38508.3			240000	84
	38678.8			260000	77
	39268			280000	85
	39674			300000	76
	39674			320000	76
	39762.3			340000	74
	41301.7			360000	78
	41464			380000	69
	42903.7			400000	64
	43318.2			420000	55
	43465.5			440000	42
	44746.7			460000	46
	45329.5			480000	49
	45508.3			500000	48
	45817.3			520000	39
	45874			540000	49
	46632.6			560000	45
	46801.5			580000	30
	46813.3			600000	20
	46959.8			620000	23
	47147.7			640000	31
	47493.5			660000	26
	47852.2			680000	23
	48244.2			700000	23
	48270.7			720000	29
	48790			740000	16
	49044.7			760000	16
	49146			780000	19
	49176.7			800000	19
	49950.5			820000	16
	50142.8			840000	12
	50245			860000	11
	50268.5			880000	11
	50340.6			900000	12
	50744.1			920000	7
	50848.6			940000	7
	50932			960000	8
	51420			980000	9
	51858.4			1000000	10
	52095.3			1020000	7
	52126			1040000	4
	52915			1060000	3
	52984.3			1080000	5
	53065			1100000	6
	53556.7			1120000	0
	53567.4			1140000	6
	53639			1160000	2
	53639.2			1180000	3
	53810.8			1200000	3
	53925.5			1220000	3
	53992.8			1240000	1
	54216			1260000	3
	54240.2			1280000	1
	54307.3			1300000	5
	54402.5			1320000	4
	54574.5			1340000	4
	54976			1360000	3
	54984.3			1380000	2
	55261			1400000	3
	55451.8			1420000	1
	55750.5			1440000	0
	55770			1460000	1
	55770			1480000	1
	55831.3			1500000	2
	56215.2			1520000	7
	56258.5			1540000	2
	56279.6			1560000	1
	56521.4			1580000	2
	56593			1600000	2
	57157.7			1620000	3
	57250.9			1640000	1
	57275.8			1660000	3
	57316.3			1680000	1
	57327.6			1700000	3
	57373.3			1720000	0
	57408			1740000	2
	57443.3			1760000	4
	57595			1780000	2
	57595			1800000	0
	57772.1			1820000	1
	58131.5			1840000	1
	58200.4			1860000	2
	58200.4			1880000	1
	58471.5			1900000	2
	58551			1920000	3
	58793.5			1940000	2
	59427.7			1960000	2
	59460.7			1980000	1
	59500			2000000	0
	59599.3			2020000	1
	59599.3			2040000	0
	59618.8			2060000	0
	59764.1			2080000	0
	59829			2100000	2
	59936.9			2120000	1
	60057.3			2140000	1
	60361.6			2160000	3
	60646.3			2180000	0
	60749.5			2200000	2
	60769.2			2220000	1
	60962.6			2240000	1
	60985			2260000	4
	61058.6			2280000	0
	61275			2300000	0
	61691			2320000	0
	61806			2340000	1
	61856			2360000	0
	61904.8			2380000	0
	61915.1			2400000	0
	62182.1			2420000	0
	62395.5			2440000	0
	62693			2460000	1
	62742.8			2480000	1
	62776.5			2500000	1
	62789			2520000	1
	63029.5			2540000	2
	63224.6			2560000	2
	63352.2			2580000	1
	64258			2600000	1
	64328.2			2620000	0
	64445.6			2640000	0
	64612			2660000	0
	64904			2680000	0
	65247.2			2700000	0
	65584.8			2720000	0
	65728.1			2740000	3
	66049.2			2760000	2
	66158.3			2780000	0
	66284.3			2800000	1
	66359.1			2820000	0
	66404			2840000	0
	66417.3			2860000	0
	66471.4			2880000	0
	66551.3			2900000	0
	66635.8			2920000	0
	66641.8			2940000	0
	66862			2960000	1
	66964.5			2980000	1
	67028.1			3000000	0
	67057.5			3020000	0
	67253			3040000	1
	67297.9			3060000	0
	67305			3080000	0
	67334			3100000	0
	67379.4			3120000	0
	67400.1			3140000	0
	67489.3			3160000	0
	67514.8			3180000	0
	67560			3200000	0
	67560			3220000	0
	67628.5			3240000	0
	68066			3260000	0
	68076.2			3280000	0
	68134.3			3300000	2
	68232.4			3320000	0
	68260.9			3340000	0
	68274			3360000	0
	68320.2			3380000	0
	68397.5			3400000	0
	68499.4			3420000	0
	68893.4			3440000	0
	68943.4			3460000	0
	68944.9			3480000	0
	69280.6			3500000	0
	69311.5			3520000	0
	69526			3540000	1
	69580.4			3560000	0
	69626			3580000	0
	69663			3600000	0
	70475			3620000	0
	70687.4			3640000	1
	70719.9			3660000	0
	70860			3680000	0
	71018			3700000	1
	71440			3720000	0
	71453.1			3740000	0
	71652.4			3760000	0
	71675.6			3780000	0
	71696.6			3800000	0
	71717.9			3820000	0
	71722			3840000	0
	72058.4			3860000	0
	72133.7			3880000	0
	72715.9			3900000	0
	73039.3			3920000	0
	73149.8			3940000	0
	73176.7			3960000	0
	73370.9			3980000	0
	73620			4000000	0
	73702			4020000	0
	73996			4040000	0
	74024			4060000	0
	74024			4080000	0
	74248.9			4100000	0
	74430.8			4120000	0
	74476.9			4140000	0
	74534			4160000	0
	74538			4180000	0
	74740.9			4200000	0
	74831.8			4220000	1
	74910.3			4240000	1
	74925.3			4260000	0
	75167.6			4280000	1
	75173			4300000	0
	75288.6			4320000	0
	75349.6			4340000	0
	75371.6			4360000	0
	75556.2			4380000	0
	75660.2			4400000	0
	75952			4420000	0
	75954			4440000	0
	76227.1			4460000	0
	76327			4480000	0
	76526.6			4500000	0
	76738			4520000	0
	76741			4540000	0
	76831.7			4560000	0
	76971.8			4580000	0
	77130			4600000	0
	77325.4			4620000	0
	77430.4			4640000	0
	77823			4660000	0
	77823			4680000	0
	77897.7			4700000	0
	78076.9			4720000	0
	78386			4740000	0
	78585			4760000	0
	78619			4780000	2
	78847			4800000	0
	78847			4820000	0
	78855			4840000	0
	78925.5			4860000	0
	78967			4880000	0
	79014.6			4900000	0
	79439.1			4920000	1
	79439.1			4940000	0
	79628.2			4960000	0
	79652.1			4980000	0
	79759.1			5000000	0
	79850.5			5020000	0
	79939.7			5040000	0
	79994.6			5060000	0
	80408.3			5080000	0
	80778.8			5100000	0
	80803.2			5120000	0
	81129			5140000	0
	81288.3			5160000	0
	81288.3			5180000	0
	81408.5			5200000	0
	81421.6			5220000	0
	82453.5			5240000	0
	82504.2			5260000	0
	82630.5			5280000	0
	82630.5			5300000	0
	83306.5			5320000	0
	83538.3			5340000	0
	83690.1			5360000	0
	84150			5380000	0
	84161.4			5400000	0
	84321.3			5420000	0
	84519.2			5440000	0
	84600.1			5460000	0
	84673			5480000	0
	84830.4			5500000	0
	84880.5			5520000	0
	84909.4			5540000	1
	84928.5			5560000	0
	84972			5580000	0
	85300.5			5600000	0
	86148			5620000	0
	86295			5640000	0
	86435			5660000	0
	86572			5680000	0
	86949.2			5700000	0
	87086			5720000	0
	87207.1			5740000	0
	87323.3			5760000	0
	87393			5780000	0
	87714			5800000	0
	87807.5			5820000	0
	87833.1			5840000	0
	87833.1			5860000	0
	88032.6			5880000	0
	88723.3			5900000	0
	88724			5920000	0
	88804.1			5940000	0
	89145.1			5960000	0
	89236			5980000	0
	89303.1			6000000	0
	89532			6020000	0
	89895.5			6040000	1
	90153.3			6060000	0
	90355.8			6080000	0
	90822.8			6100000	1
	90975.7			6120000	0
	91520.2			6140000	0
	91532.5			6160000	0
	91657.4			6180000	0
	92017.7			6200000	0
	92231.4			6220000	0
	92252.8			6240000	0
	92274.7			6260000	0
	92311.4			6280000	0
	92335			6300000	0
	92531			6320000	0
	92531			6340000	0
	92553.5			6360000	0
	92658			6380000	0
	92687.7			6400000	0
	92722.9			6420000	0
	92748.1			6440000	0
	93112.6			6460000	0
	93121			6480000	0
	93163.8			6500000	0
	93507.2			6520000	0
	93796.3			6540000	0
	93862.3			6560000	0
	94142			6580000	0
	94273.8			6600000	0
	94301			6620000	0
	94346.9			6640000	0
	94458			6660000	0
	94534			6680000	0
	94611.4
	94948.4
	95162.4
	95194
	95194
	95438.8
	95539.5
	95596.7
	95888.5
	96039.9
	96233.5
	96307.8
	96318.4
	96749.2
	97048.2
	97048.2
	97089.5
	97510.1
	97939.2
	97980
	98163.2
	98217
	98257.2
	98364
	98744.5
	98807.6
	99475
	99628.6
	99639.4
	99801.8
	99829.9
	100155
	100314
	100527
	100742
	101023
	101355
	101368
	101800
	101837
	101925
	101947
	102187
	102216
	102617
	102925
	102929
	103107
	103546
	103608
	103806
	103856
	104001
	104237
	104650
	104667
	104735
	104841
	105180
	105266
	105464
	105525
	105675
	105902
	105966
	106050
	106051
	106142
	106481
	106547
	106779
	106848
	106954
	106954
	107195
	107270
	107735
	108348
	108493
	109135
	109135
	109159
	109248
	109263
	109263
	109317
	109564
	109588
	109886
	109888
	110178
	110330
	110753
	110793
	110843
	110880
	110996
	111655
	111681
	112519
	112561
	112561
	113326
	113338
	113697
	113820
	113860
	113894
	113914
	114374
	114673
	114868
	115268
	115350
	115358
	115547
	115636
	115699
	115930
	116094
	116184
	116194
	116338
	116497
	116552
	116840
	117197
	117488
	117493
	117504
	117584
	117627
	118323
	118340
	118641
	118884
	118925
	119045
	119251
	119469
	119470
	119576
	119871
	119910
	119981
	120024
	120165
	120243
	120329
	120402
	120475
	120492
	120621
	120786
	120805
	120816
	120966
	120974
	121064
	121178
	121187
	121304
	121637
	121679
	121813
	122297
	122413
	122694
	122711
	122715
	123267
	123475
	124187
	124855
	124855
	125098
	125134
	125153
	125324
	125743
	125792
	126143
	126166
	126358
	126462
	126633
	126633
	126673
	126902
	126927
	127080
	127093
	127267
	127517
	127530
	127664
	128043
	128868
	128885
	128915
	128969
	129147
	129196
	129196
	129421
	129480
	129721
	129814
	129831
	129853
	129943
	130357
	130374
	130374
	130440
	130443
	130595
	130627
	131513
	131537
	131932
	132138
	133692
	134108
	134492
	135014
	135070
	135083
	135125
	135170
	135883
	135922
	136058
	136158
	136339
	136507
	136812
	136908
	137092
	137338
	137438
	137926
	138030
	138223
	138355
	138518
	138611
	139177
	139181
	139763
	139838
	139891
	139944
	140036
	140055
	140063
	140281
	140438
	140596
	140730
	141036
	141250
	141312
	141544
	141824
	141918
	142221
	142221
	142257
	142305
	142523
	142543
	142610
	142622
	143107
	143139
	143413
	143687
	144157
	144182
	144722
	144775
	144838
	144863
	145170
	145233
	145263
	145312
	145769
	145769
	145950
	146094
	146401
	146532
	146565
	146651
	146701
	147203
	147646
	147712
	148074
	148426
	148441
	148467
	148663
	148810
	148831
	149003
	149184
	149407
	149486
	149540
	149703
	150055
	150187
	150359
	150395
	150789
	150791
	150899
	150939
	151388
	151426
	151529
	152098
	152174
	152206
	152562
	152747
	152807
	152890
	153255
	153369
	153500
	153667
	153714
	153814
	154055
	154263
	154435
	154936
	154968
	155151
	155653
	155754
	155762
	155931
	156309
	156405
	156676
	156676
	156953
	157177
	157430
	157503
	157564
	157717
	158245
	158501
	158574
	158636
	158701
	158701
	158881
	158997
	159042
	159490
	159857
	160019
	160019
	160069
	160139
	160684
	160684
	160958
	160962
	161236
	161468
	161685
	161783
	161786
	161822
	161994
	162054
	162185
	162429
	162526
	162552
	162560
	162567
	162628
	162755
	162980
	163008
	163122
	163473
	163506
	163750
	163905
	163948
	164030
	164032
	164523
	164539
	165764
	165803
	166036
	166119
	166373
	166461
	166841
	166867
	166926
	168088
	168221
	168324
	168790
	169069
	169214
	169232
	169389
	169490
	169522
	170114
	170205
	170263
	170729
	170871
	171057
	171411
	171485
	171487
	171906
	172090
	172226
	173023
	173175
	173180
	173271
	173393
	173436
	173649
	173703
	173882
	174121
	174855
	175217
	175617
	175767
	175813
	175814
	175819
	175903
	175928
	176142
	176221
	176539
	176831
	177078
	177500
	178052
	178350
	178468
	178567
	178721
	178731
	179119
	179138
	179189
	179336
	179391
	179779
	179869
	179994
	179994
	180047
	180048
	180447
	181052
	181269
	181625
	181639
	181893
	181898
	182044
	182589
	182762
	183087
	183260
	183388
	183418
	183459
	183466
	183506
	183755
	183945
	184080
	184167
	184328
	184390
	184546
	184944
	185321
	185323
	185405
	185548
	186046
	186149
	186172
	186319
	186548
	187272
	187364
	187876
	187955
	188337
	188444
	188475
	188556
	188881
	188992
	189335
	189673
	189865
	189907
	190013
	190290
	190433
	190549
	190619
	190725
	190795
	190908
	190946
	191158
	191166
	191218
	191302
	192274
	192449
	192994
	193581
	194026
	194088
	194102
	194103
	194170
	194499
	194637
	194698
	195187
	195265
	195300
	195579
	195807
	195900
	195972
	196279
	196383
	196520
	196835
	197109
	197586
	197781
	198725
	199184
	199360
	199589
	199593
	199970
	200016
	200145
	200145
	200514
	200542
	200984
	201393
	201493
	201553
	201604
	201774
	202098
	202190
	202246
	202357
	202433
	202870
	203088
	203238
	203672
	203890
	204179
	204494
	205546
	205653
	205945
	206027
	206138
	206150
	206735
	206813
	206953
	207023
	207034
	207191
	207191
	207290
	207391
	207709
	208045
	208053
	208267
	208317
	208388
	208738
	208751
	208783
	209010
	209311
	209627
	209692
	209981
	210435
	210602
	210772
	210900
	211074
	211076
	211131
	212037
	212175
	212374
	212803
	212947
	213376
	213421
	213435
	213849
	213878
	214175
	214252
	214596
	215110
	215135
	215335
	215376
	215489
	215566
	215870
	215941
	216204
	216289
	216719
	217136
	217211
	217459
	217574
	217594
	217708
	218362
	218390
	218425
	218430
	218687
	218770
	219005
	219039
	219523
	219846
	220273
	220444
	220559
	220660
	220696
	220762
	221192
	221289
	221332
	221506
	221694
	221769
	221997
	222279
	222440
	222510
	222517
	222634
	223137
	223216
	223222
	223256
	223643
	223793
	223934
	223976
	224033
	224077
	224078
	224435
	224526
	225204
	225520
	225630
	225732
	225856
	225938
	226001
	226050
	226262
	226275
	227101
	227281
	228388
	228711
	228754
	229047
	229318
	229318
	229409
	230033
	230073
	230412
	230813
	230890
	230927
	231201
	231213
	231866
	232042
	232328
	233083
	233507
	234402
	234405
	234687
	235254
	236276
	236650
	236751
	236790
	236947
	237374
	237511
	237554
	237715
	238076
	239045
	239129
	239267
	239301
	239410
	239747
	239854
	240079
	240079
	240728
	240765
	242456
	242667
	242692
	242850
	242927
	243149
	243366
	243506
	243753
	243993
	244297
	244518
	245064
	245678
	245793
	245970
	246153
	246870
	247057
	247086
	247306
	247732
	247732
	248196
	248263
	248453
	248833
	248896
	248926
	248939
	249103
	249150
	249363
	249435
	249565
	249588
	249758
	249886
	249906
	250367
	250529
	251605
	251634
	251648
	251657
	252053
	252361
	252679
	252680
	252680
	252862
	253389
	253654
	253851
	253871
	254097
	254791
	255000
	255234
	255247
	255779
	255821
	256482
	256978
	257025
	257335
	257337
	257571
	258327
	259419
	259740
	259887
	259981
	260068
	260170
	260266
	260509
	260717
	261068
	261104
	261320
	261436
	261552
	261716
	261716
	261992
	262134
	262134
	262148
	262168
	262986
	263192
	263341
	263881
	264165
	264409
	264501
	264516
	264703
	265110
	265424
	265661
	265713
	265845
	266009
	266103
	266113
	266211
	266338
	267240
	267314
	267473
	267689
	267734
	268337
	268401
	268578
	268619
	269845
	270935
	270998
	271305
	271357
	271689
	272121
	272326
	272729
	272753
	272892
	273164
	273279
	273371
	273599
	273814
	274025
	274616
	274720
	275086
	275138
	275146
	275382
	275413
	275870
	275970
	276024
	276420
	276752
	277524
	277785
	278289
	278399
	278984
	279288
	279435
	279436
	279723
	279739
	279866
	280040
	280040
	280461
	280907
	281292
	281567
	281912
	282092
	282848
	283169
	283542
	283622
	283674
	283689
	284633
	284643
	285094
	285427
	285461
	285584
	285584
	285584
	285831
	286032
	286307
	286603
	286790
	287262
	287310
	287953
	288084
	288139
	288149
	288212
	288420
	288466
	288530
	288596
	288610
	288809
	288811
	289370
	289451
	289587
	290424
	290746
	291240
	291751
	291941
	292418
	292479
	292700
	292845
	293062
	293404
	293851
	294573
	294913
	294929
	295551
	296486
	296614
	297011
	297070
	297108
	297537
	297625
	297875
	298101
	298284
	298586
	298684
	298960
	298984
	299027
	299468
	300049
	300289
	301144
	301380
	301458
	302992
	303007
	303154
	303290
	303339
	303349
	303405
	303714
	303715
	304006
	304123
	304638
	304951
	305228
	305485
	305485
	305742
	306475
	307054
	307209
	307789
	307929
	308482
	309072
	309144
	310325
	310337
	310813
	310962
	311376
	311723
	311795
	312094
	312266
	312598
	313204
	313204
	313227
	313392
	313400
	313434
	313481
	313719
	313975
	313975
	313996
	314038
	314108
	314355
	314360
	314513
	314701
	314979
	315341
	315683
	315755
	315846
	315883
	315885
	316038
	316466
	316587
	316943
	317545
	318164
	318164
	318921
	318985
	319118
	319233
	319596
	320144
	320195
	320262
	320452
	321460
	321730
	321746
	321874
	322140
	322204
	323183
	323282
	323460
	323902
	324592
	324852
	325189
	325657
	325783
	326080
	326234
	326366
	326378
	326699
	326896
	326912
	326958
	327186
	327903
	327957
	327969
	329117
	329299
	329483
	329698
	329698
	330457
	330462
	330469
	330710
	330741
	331412
	331669
	331669
	331911
	332139
	332224
	332258
	332274
	332383
	332841
	332985
	333248
	333582
	333872
	334408
	334500
	334531
	335024
	335024
	335345
	335601
	335709
	336059
	336318
	336415
	336424
	337412
	337850
	338249
	339175
	339215
	339532
	339857
	340169
	340271
	340422
	340540
	340749
	340784
	340784
	340926
	341190
	341482
	341970
	342091
	342808
	342905
	343082
	343116
	343281
	344042
	344205
	344303
	344914
	345171
	345421
	345480
	345634
	345879
	345905
	345949
	346002
	346034
	346217
	346756
	347011
	347011
	347108
	347518
	347674
	347845
	348539
	349014
	350131
	350420
	351262
	351368
	352997
	353002
	353461
	353597
	353878
	354460
	354861
	355229
	355530
	355747
	355777
	356023
	356417
	356573
	356774
	356971
	357177
	357608
	357698
	357748
	357762
	357933
	357968
	358473
	358556
	358628
	358715
	358760
	358926
	359540
	359551
	359587
	359962
	359962
	360569
	360578
	360703
	361458
	361474
	361499
	361790
	362180
	362315
	362740
	363408
	363472
	363606
	363780
	363886
	363890
	364314
	364557
	364602
	365044
	365895
	365996
	366154
	366414
	366457
	366510
	367170
	367437
	367612
	367884
	368094
	368164
	368325
	368357
	368648
	368993
	368999
	369743
	369948
	370156
	370491
	370788
	370894
	371401
	372034
	372300
	372809
	372979
	373610
	373833
	374827
	375071
	375076
	375256
	375371
	375513
	376098
	376148
	376583
	376782
	377345
	377887
	378011
	378028
	378051
	378831
	378854
	378954
	379773
	380349
	380585
	380964
	381176
	381727
	381727
	381870
	382071
	382451
	382535
	382754
	382859
	382905
	382968
	382992
	383192
	383580
	384396
	384827
	385282
	385389
	385389
	385687
	385842
	386236
	386236
	386633
	386883
	386931
	387543
	387691
	387777
	387883
	388219
	388648
	388697
	388896
	388896
	389416
	389416
	389915
	389957
	390400
	390811
	390976
	391038
	391331
	391411
	391515
	391994
	392784
	393570
	394014
	394389
	395230
	395520
	395644
	395790
	396985
	397048
	398236
	398394
	398749
	399163
	400401
	400606
	400914
	401027
	401193
	401804
	401821
	401952
	402410
	402532
	402824
	403082
	403193
	403193
	403207
	403851
	404449
	405016
	405026
	406138
	406897
	407070
	407896
	408075
	409868
	409896
	410135
	410295
	410434
	410779
	410813
	411580
	412166
	412175
	412942
	413508
	413512
	413843
	413860
	414130
	414130
	415253
	415300
	416809
	417157
	417523
	417526
	417655
	417867
	417927
	418443
	419153
	419258
	419534
	419907
	420283
	421182
	421341
	421729
	421850
	421889
	424727
	424845
	425207
	425518
	425682
	425832
	425832
	426544
	427642
	429192
	429461
	429897
	431444
	431857
	432300
	432341
	432368
	433346
	433358
	433358
	433525
	434393
	434648
	435118
	435852
	436098
	436164
	436182
	436201
	436998
	437301
	437658
	438924
	439086
	439120
	439575
	441002
	441223
	441657
	441825
	442261
	442261
	442666
	443026
	443173
	443844
	443866
	443941
	444229
	444678
	445148
	445542
	445868
	446408
	446529
	447473
	448030
	448509
	448655
	448901
	449299
	449718
	449808
	449808
	450074
	450216
	451165
	451631
	452635
	452969
	453331
	453452
	453513
	454116
	454260
	454625
	456552
	457104
	457130
	457181
	459400
	459749
	460433
	460440
	460504
	460533
	460703
	460719
	460766
	461647
	461647
	462047
	462421
	462421
	462589
	463411
	464369
	464670
	464891
	464975
	465341
	465412
	465451
	465967
	466431
	466982
	467357
	468072
	468674
	468702
	468717
	470252
	471481
	472876
	473289
	473977
	474061
	474061
	474598
	476519
	476830
	477104
	477169
	477309
	477381
	478555
	478945
	479138
	479326
	479395
	479621
	480223
	481033
	481416
	482304
	482504
	482723
	482766
	483276
	483460
	485146
	485433
	485899
	486119
	486158
	486757
	486932
	487110
	487474
	488253
	488552
	488824
	489166
	489166
	489617
	489999
	490795
	490795
	490980
	491734
	491982
	492014
	492024
	492426
	492480
	492781
	493965
	494088
	495910
	495960
	495994
	496331
	496514
	496514
	496681
	497577
	498657
	498780
	498836
	500345
	500345
	500955
	502124
	502170
	502466
	502736
	503207
	503207
	503721
	503744
	503951
	504040
	504174
	505223
	505394
	506709
	506878
	506878
	507105
	507155
	507470
	507940
	507955
	507998
	509152
	509463
	509588
	510060
	511183
	511680
	512885
	513510
	513755
	515054
	515288
	516285
	517056
	518273
	520282
	520516
	521041
	521041
	521433
	522247
	522360
	522486
	523316
	523353
	523490
	523682
	523734
	525198
	525349
	525535
	525595
	526053
	527241
	528384
	528612
	529270
	529617
	529725
	530285
	531800
	531895
	532031
	532054
	533605
	533707
	533786
	534079
[truncated: 612 more rows]

## Sheet: Figure 2 supplement 2b
	Intensities		Total # particle		frequence
	7324.36		2815	0	0
	30855.5			25000	1
	32086.2			50000	30
	33888.2			75000	93
	34740.6			100000	133
	35627.5			125000	131
	35754.1			150000	111
	36501			175000	124
	36923			200000	92
	37520			225000	98
	37818.5			250000	83
	38108			275000	82
	38960.5			300000	72
	40428			325000	83
	41199.8			350000	81
	41468			375000	67
	42009.5			400000	71
	42238			425000	76
	42496.5			450000	80
	43426.1			475000	71
	45134.3			500000	52
	45469			525000	50
	45865.6			550000	58
	45915			575000	66
	46632			600000	68
	46764.5			625000	39
	46972			650000	44
	47149			675000	42
	47824			700000	37
	48597.9			725000	35
	49028.8			750000	26
	50181.1			775000	34
	50290			800000	35
	50333			825000	33
	50440			850000	28
	51028.5			875000	19
	51228.7			900000	20
	52124			925000	21
	52124			950000	19
	52632			975000	19
	52729.4			1000000	22
	52998			1025000	21
	54173			1050000	14
	55059			1075000	19
	55189.2			1100000	15
	55338			1125000	11
	55518.5			1150000	14
	55564			1175000	6
	55906			1200000	13
	56832			1225000	13
	57292.9			1250000	11
	57492			1275000	9
	57667.5			1300000	12
	58024			1325000	11
	58720.6			1350000	8
	58728			1375000	9
	58864			1400000	7
	59287			1425000	15
	59327			1450000	3
	59984.1			1475000	7
	60075			1500000	9
	60081.1			1525000	13
	60180			1550000	11
	60297			1575000	7
	61077.9			1600000	3
	61115			1625000	11
	61526.5			1650000	10
	61678.5			1675000	3
	62348			1700000	2
	62468			1725000	6
	62754			1750000	4
	63423			1775000	6
	63423			1800000	4
	63583			1825000	5
	63607			1850000	6
	63625.6			1875000	4
	64243			1900000	6
	65079.6			1925000	4
	65564.1			1950000	4
	65732			1975000	1
	65785.3			2000000	2
	65918			2025000	2
	66007			2050000	3
	66328.5			2075000	6
	66414.5			2100000	4
	66569			2125000	4
	67087.3			2150000	2
	67112			2175000	2
	67187			2200000	5
	67322			2225000	3
	67379			2250000	2
	67395			2275000	1
	67560			2300000	4
	67687			2325000	3
	68113			2350000	3
	68517			2375000	2
	68543.9			2400000	2
	69091.3			2425000	2
	69487			2450000	3
	69559			2475000	1
	69576			2500000	5
	69997			2525000	2
	70228			2550000	1
	70589			2575000	2
	70609			2600000	1
	70614			2625000	2
	70663			2650000	3
	70766			2675000	0
	70856.3			2700000	2
	70968			2725000	2
	70975.3			2750000	2
	71553.8			2775000	3
	71976			2800000	6
	72226.1			2825000	3
	72318.1			2850000	1
	72795.9			2875000	1
	72849			2900000	2
	73133			2925000	3
	73440.9			2950000	0
	73757.3			2975000	0
	73830.2			3000000	0
	73947.1			3025000	1
	73965			3050000	1
	74407			3075000	0
	75052			3100000	0
	75196			3125000	0
	75308			3150000	1
	75360			3175000	0
	75437			3200000	1
	75719			3225000	1
	75743.3			3250000	0
	75882			3275000	0
	76005.5			3300000	1
	76093			3325000	0
	76369.6			3350000	2
	76467			3375000	1
	76474			3400000	1
	76627.5			3425000	1
	76679.6			3450000	1
	76738			3475000	0
	76786			3500000	0
	77188.6			3525000	0
	77589			3550000	0
	77628			3575000	1
	77708			3600000	1
	78128.5			3625000	0
	78514.9			3650000	2
	78789.7			3675000	1
	79048			3700000	2
	79303.8			3725000	1
	79340			3750000	1
	79775			3775000	0
	79936			3800000	1
	79973.7			3825000	0
	80331.6			3850000	0
	80334			3875000	0
	80432			3900000	1
	80533			3925000	1
	80577.2			3950000	1
	81281			3975000	0
	81463.9			4000000	0
	81803			4025000	0
	81896			4050000	0
	83150.9			4075000	0
	83245			4100000	0
	83598.6			4125000	0
	83829			4150000	0
	84116			4175000	0
	84322			4200000	1
	84353			4225000	0
	84794.5			4250000	0
	84892.9			4275000	1
	85131			4300000	0
	85515			4325000	0
	85544			4350000	0
	86546.1			4375000	1
	86786.2			4400000	0
	86973.5			4425000	0
	87062.6			4450000	0
	87166.6			4475000	0
	87461			4500000	1
	87519			4525000	0
	87621			4550000	0
	87712			4575000	1
	87721.2			4600000	0
	87940.4			4625000	0
	88205.8			4650000	0
	88213.7			4675000	0
	88242.1			4700000	0
	88333			4725000	0
	88410			4750000	0
	88488.7			4775000	0
	88759.4			4800000	0
	89190.7			4825000	0
	89406			4850000	0
	89417.2			4875000	0
	89482			4900000	0
	89714.5			4925000	0
	89794			4950000	0
	90481			4975000	0
	90677			5000000	0
	90713			5025000	0
	90800			5050000	0
	91030.3			5075000	0
	91032			5100000	0
	91040			5125000	0
	91512.1			5150000	0
	91515.5			5175000	0
	91542.3			5200000	0
	92393			5225000	0
	92604.3			5250000	1
	93294			5275000	0
	93638.6			5300000	0
	93703.9			5325000	0
	94021			5350000	0
	94177.7			5375000	0
	94260			5400000	0
	94441.2			5425000	0
	94524.8			5450000	0
	94618			5475000	0
	94718			5500000	0
	95072.5			5525000	0
	95544			5550000	0
	95718.4			5575000	0
	96031.2			5600000	0
	96285.5			5625000	0
	96369.3			5650000	0
	96688			5675000	0
	96726			5700000	0
	96913			5725000	0
	97298.7			5750000	0
	97751.9			5775000	1
	97800			5800000	0
	97883			5825000	0
	98009			5850000	0
	98027			5875000	0
	98197.5			5900000	0
	98265			5925000	1
	98336.1			5950000	0
	98492			5975000	0
	98531			6000000	0
	98837			6025000	0
	98911.4			6050000	0
	98976.5			6075000	0
	98995			6100000	0
	99076			6125000	0
	99107			6150000	0
	99136			6175000	0
	99354			6200000	0
	99392			6225000	0
	99516			6250000	0
	99592			6275000	0
	99616.7			6300000	0
	99754.5			6325000	0
	99864			6350000	0
	99917			6375000	0
	99936			6400000	0
	100107			6425000	0
	100309			6450000	0
	100547			6475000	0
	100748			6500000	0
	101032			6525000	0
	101303			6550000	0
	101522			6575000	0
	101983			6600000	0
	102080			6625000	0
	102190			6650000	0
	102413			6675000	0
	102418			6700000	0
	102447			6725000	0
	102621			6750000	0
	102689			6775000	0
	102756			6800000	0
	102800			6825000	0
	102891			6850000	0
	103113			6875000	0
	103122			6900000	0
	103384			6925000	0
	103555			6950000	0
	103612			6975000	1
	103803			7000000	0
	103851			7025000	0
	104053			7050000	0
	104229			7075000	0
	104553			7100000	0
	104793			7125000	0
	104857			7150000	0
	104884			7175000	0
	105037			7200000	0
	105163			7225000	0
	105282			7250000	0
	105320			7275000	0
	105762			7300000	0
	106191			7325000	0
	106338			7350000	0
	106372			7375000	0
	106538			7400000	0
	106562			7425000	0
	106577			7450000	0
	106822			7475000	0
	107820			7500000	0
	108304			7525000	1
	108349			7550000	0
	108553			7575000	0
	109223			7600000	0
	109341			7625000	0
	109853			7650000	0
	109967			7675000	0
	109996			7700000	0
	110145			7725000	0
	110544			7750000	0
	110608			7775000	0
	110833			7800000	0
	110931			7825000	0
	111085			7850000	0
	111294			7875000	0
	111759			7900000	0
	112083			7925000	0
	112110			7950000	0
	112758			7975000	0
	112855			8000000	0
	112918			8025000	0
	112927			8050000	0
	113025			8075000	0
	113263			8100000	0
	113546			8125000	0
	113586			8150000	0
	114098			8175000	0
	114254			8200000	0
	114511			8225000	0
	114586			8250000	0
	114634			8275000	0
	114737			8300000	0
	114770			8325000	0
	114835			8350000	0
	114873
	114971
	114989
	115176
	115231
	115354
	115703
	115733
	116074
	116169
	116385
	116512
	116548
	117100
	117593
	117611
	117667
	117859
	117886
	118678
	118733
	119136
	120012
	120159
	120443
	120516
	120641
	120655
	120693
	120989
	121148
	121206
	121397
	121640
	122199
	122470
	122683
	122691
	122739
	122963
	123089
	123290
	123308
	123329
	123582
	123748
	124164
	124533
	124562
	124579
	124676
	124863
	124924
	125020
	126215
	126230
	126825
	127107
	127152
	127486
	127675
	127759
	128748
	129101
	129411
	129819
	129912
	130060
	130122
	130736
	131124
	132070
	132184
	132522
	133024
	133256
	133532
	134441
	134676
	134939
	135216
	135456
	135873
	135888
	135917
	136081
	136212
	136341
	136361
	137339
	137393
	137611
	137920
	137959
	137972
	138035
	138340
	138533
	138538
	138844
	139026
	139092
	139305
	139807
	139942
	140022
	140302
	140332
	140495
	140500
	140521
	140580
	140760
	140936
	141212
	141337
	141490
	141779
	142012
	142082
	142153
	142248
	142661
	142867
	142942
	142993
	143004
	143007
	143335
	143389
	143494
	143600
	143604
	143860
	143996
	144182
	144378
	144642
	144721
	145320
	145543
	145862
	145941
	146307
	146312
	146384
	146504
	146535
	146637
	146641
	147226
	147319
	148214
	148239
	148609
	148619
	148732
	148780
	148841
	149047
	149412
	149470
	149647
	149687
	150379
	150708
	150708
	151340
	151461
	151870
	152196
	152475
	152711
	152754
	153041
	153206
	153575
	153705
	153725
	153987
	154004
	154620
	154658
	154671
	155181
	155227
	155289
	155572
	155706
	156046
	156116
	156118
	156133
	156355
	156492
	156493
	156561
	156573
	157017
	157021
	157048
	157066
	157115
	157146
	157184
	157567
	157648
	158244
	158255
	158483
	158571
	158602
	158775
	158917
	159216
	159334
	159948
	160337
	160370
	160748
	160916
	161072
	161091
	161116
	161368
	161526
	161535
	162163
	162216
	162308
	162793
	162795
	162835
	163280
	163612
	163698
	164145
	164284
	164731
	164988
	165051
	165078
	165082
	165226
	165763
	165874
	165875
	165949
	166145
	166273
	167017
	167338
	167983
	168033
	168150
	168232
	168316
	168341
	168348
	168532
	168837
	168925
	168994
	168994
	169148
	169365
	169620
	169912
	170350
	170647
	170710
	170817
	170969
	171176
	171197
	171552
	171742
	171829
	172353
	172794
	173015
	173039
	173535
	173642
	173930
	174782
	174796
	174875
	175115
	175216
	175688
	175748
	176178
	176228
	176759
	176907
	177240
	177314
	177360
	177372
	177517
	178409
	178614
	178755
	178763
	178864
	180026
	180231
	180648
	180909
	181316
	181570
	182783
	182811
	182814
	183414
	183480
	183753
	184163
	184433
	184975
	185186
	185563
	185965
	186097
	186178
	186285
	186336
	186550
	186826
	186853
	186964
	187093
	187569
	187608
	188434
	188461
	188787
	189366
	189468
	189716
	189956
	190390
	190394
	190495
	190674
	191233
	191321
	191441
	191505
	191549
	192229
	192702
	192711
	192978
	194133
	195008
	195216
	195236
	195445
	195908
	195947
	196419
	196470
	196523
	196634
	196672
	196842
	197079
	197192
	197303
	197733
	197788
	198018
	198376
	198912
	199126
	199268
	199407
	199893
	200139
	200747
	200888
	201103
	201179
	201355
	201521
	201963
	202416
	202830
	202841
	202941
	203388
	203668
	203726
	203825
	203995
	204176
	204761
	204951
	205056
	205517
	206848
	206907
	207077
	207106
	207138
	207537
	207586
	207731
	207770
	208138
	209270
	209351
	209655
	209920
	209956
	209960
	210369
	210746
	210914
	210963
	211078
	211445
	211572
	211638
	211639
	212003
	213073
	213436
	213582
	213938
	214190
	214788
	214817
	214855
	215425
	215491
	215623
	215734
	215948
	216298
	216409
	216740
	216851
	217006
	217398
	217478
	217557
	217651
	217867
	217971
	218005
	218319
	218805
	219045
	219215
	219311
	219515
	219839
	219893
	220421
	221045
	221118
	221162
	221553
	221561
	221601
	222026
	223018
	223280
	223839
	224140
	224491
	224616
	224767
	224853
	224864
	225837
	226960
	227280
	228025
	228114
	228148
	229021
	229106
	229253
	229548
	229659
	229692
	230258
	230675
	230751
	230808
	230982
	231004
	231553
	231610
	232017
	232177
	232409
	232476
	232695
	232720
	232732
	233076
	233215
	233266
	233354
	233840
	233970
	234069
	234234
	234451
	234988
	235356
	235659
	236161
	236851
	237683
	237835
	238243
	238544
	238930
	238979
	239135
	239179
	239309
	239313
	239496
	239825
	239912
	240626
	240641
	240655
	241043
	241140
	241542
	242782
	242815
	243039
	243713
	243731
	243764
	243856
	243873
	244220
	244270
	244404
	244451
	244572
	246011
	246043
	247474
	247619
	247696
	248161
	248352
	249236
	249406
	249521
	250931
	251012
	251488
	251681
	251819
	252683
	253052
	253455
	254018
	254161
	254346
	254354
	254536
	255095
	255585
	255681
	256130
	256896
	257046
	257313
	257551
	257557
	258113
	258574
	259921
	260043
	260090
	260181
	260188
	260264
	260343
	260395
	260510
	261539
	261557
	261707
	261709
	261979
	262018
	262208
	262316
	262774
	263014
	263127
	263279
	263522
	264702
	264735
	264826
	265483
	265514
	265650
	266053
	266467
	266833
	266878
	267099
	267411
	267659
	267940
	268425
	268979
	269344
	269516
	269668
	269753
	270034
	270061
	270848
	271076
	271421
	272235
	272456
	272574
	272991
	273013
	273163
	273383
	273921
	273957
	274307
	274953
	275461
	276264
	276988
	277114
	277539
	277814
	278073
	278365
	278455
	279043
	279206
	279297
	280186
	281676
	282111
	282296
	283240
	283255
	283372
	283660
	283998
	284168
	284182
	284303
	284698
	284700
	284776
	285446
	285725
	285797
	285890
	286135
	286588
	286626
	286782
	286805
	288113
	288779
	288888
	289079
	289752
	290669
	291621
	291733
	291739
	291849
	291926
	291979
	292544
	292633
	292670
	293019
	293434
	293521
	294637
	294697
	295409
	295703
	295960
	296325
	296403
	296434
	296458
	296803
	296979
	297013
	297313
	297665
	297709
	298023
	298484
	299256
	300178
	300412
	300695
	300784
	300795
	301215
	301521
	301774
	302315
	302438
	302642
	303092
	303550
	303912
	304178
	304254
	304637
	305551
	305685
	305918
	306095
	307142
	307338
	307379
	307499
	307564
	307754
	308023
	308392
	308614
	308831
	308842
	308937
	310197
	310722
	310955
	310962
	311039
	311641
	311824
	311932
	312013
	312111
	312572
	313249
	313324
	313388
	314038
	314224
	314438
	315139
	315220
	315777
	316196
	316417
	316515
	316776
	316971
	317349
	317418
	317432
	318005
	318204
	318585
	318721
	318918
	318952
	319713
	319741
	319756
	319813
	320641
	321191
	321629
	323342
	323376
	323496
	323953
	323975
	324141
	324280
	324587
	324729
	325046
	325545
	325701
	325812
	327696
	327723
	327836
	328747
	328801
	329331
	329561
	330335
	330369
	330717
	330828
	331201
	331235
	331345
	331747
	332013
	332330
	332448
	333008
	333056
	333098
	334033
	334418
	334851
	334866
	335577
	335875
	336029
	336593
	336914
	336972
	337058
	337060
	337264
	337321
	337337
	337460
	337579
	337760
	337974
	337991
	338054
	338539
	338578
	339128
	339954
	340602
	340799
	340843
	340967
	340974
	341189
	341192
	342377
	343050
	343434
	343766
	344210
	344430
	344543
	345139
	345946
	345993
	346206
	346273
	346692
	347647
	347940
	348100
	348390
	348515
	348813
	348873
	349102
	349138
	349392
	349511
	351661
	351876
	351984
	352117
	352740
	353037
	353316
	353415
	354043
	354139
	354411
	354413
	354472
	354552
	354590
	354607
	355010
	355067
	355076
	355230
	356183
	356308
	356323
	356743
	356782
	356935
	357039
	357173
	357741
	357752
	358512
	359067
	360045
	360090
	360831
	361515
	361748
	361861
	361969
	362276
	362490
	362809
	363384
	363599
	365862
	366365
	366869
	366873
	367054
	367601
	367977
	368417
	368719
	368901
	369614
	370080
	370313
	370913
	371201
	371284
	371568
	372524
	372783
	372816
	373012
	373642
	374929
	375728
	375888
	376010
	376455
	376671
	376871
	377600
	378049
	378806
	378975
	379003
	379364
	379576
	379686
	380104
	380175
	380342
	380386
	381006
	381143
	381156
	381220
	381332
	381336
	381749
	381773
	381913
	381984
	382345
	382372
	382574
	382611
	382987
	383193
	383767
	383911
	384159
	385094
	385210
	385279
	385904
	386385
	386480
	387736
	388139
	388871
	389360
	390392
	390748
	391565
	391685
	392046
	392191
	392311
	393615
	394895
	395076
	395110
	395809
	396363
	396920
	396923
	396937
	396954
	397404
	397714
	397868
	397992
	398400
	399611
	399724
	400252
	400659
	401002
	401397
	401443
	401641
	401733
	402023
	402036
	402568
	402770
	403388
	403514
	403662
	403662
	403911
	404674
	405107
	405501
	405503
	405992
	406222
	406406
	406604
	407037
	407089
	407147
	407186
	407302
	407390
	407497
	407779
	407974
	408019
	408112
	408332
	408341
	408714
	408759
	408761
	408886
	409154
	409722
	409852
	410810
	410821
	411270
	411270
	411326
	412540
	412766
	412837
	413599
	413741
	414649
	415828
	415890
	415998
	416278
	416886
	416888
	417004
	417082
	417278
	418319
	418584
	418765
	419065
	419278
	419742
	420708
	420885
	420992
	421892
	421977
	422299
	425001
	425638
	426266
	426951
	427010
	427154
	428031
	428386
	428452
	428527
	428529
	428829
	429043
	429097
	429429
	430363
	430374
	431247
	431414
	431486
	431685
	432002
	432231
	432597
	433080
	433352
	433513
	434368
	434516
	434518
	435017
	435177
	435225
	435596
	435809
	435861
	436143
	436257
	436359
	436917
	437061
	438132
	438371
	439482
	439926
	440277
	441204
	441298
	441405
	441979
	441986
	442187
	442383
	442834
	442932
	442963
	443050
	443335
	443727
	443830
	444139
	444657
	444738
	444830
	445372
	445478
	446337
	446556
	446956
	447192
	447344
	447421
	447511
	448027
	448278
	448358
	448909
	449426
	449527
	449547
	450177
	450318
	450812
	450815
	450844
	450864
	450978
	452295
	452300
	452497
	453610
	453998
	454089
	454175
	455447
	455734
	456383
	456922
	457149
	457432
	457779
	457865
	458744
	458968
	459034
	459123
	459259
	459415
	459581
	459799
	460436
	460522
	460716
	461511
	461585
	461704
	461955
	462313
	462329
	462350
	462603
	463582
	463604
	463673
	463940
	463989
	464007
	464481
	464555
	465559
	466088
	466740
	466861
	466900
	468752
	469470
	470037
	470224
	470584
	470912
	471452
	471526
	472229
	472364
	472795
	473046
	473752
	473793
	473927
	474043
	474431
	475346
	476182
	477164
	477438
	477924
	477944
	478960
	479374
	480255
	480345
	480496
	480730
	481476
	481548
	481566
	481620
	482115
	482333
	482508
	482771
	483350
	483813
	483970
	484062
	484893
	485412
	485829
	486230
	486782
	487169
	487490
	487856
	488188
	488516
	488549
	488755
	489337
	492416
	493156
	493905
	493912
	494690
	495787
	496283
	496290
	497121
	497706
	498769
	499005
	499346
	499798
	499968
	500604
	500716
	501623
	501693
	502158
	502285
	502457
	502790
	503579
	504046
	504482
	504824
	505345
	505435
	505514
	506184
	506613
	507414
	508027
	508225
	508677
	508759
	509097
	509811
	509831
	511604
	511612
	511620
	511970
	512016
	513113
	513813
	514153
	515287
	516283
	516423
	516567
	517686
	518681
	518906
	519876
	520303
	520736
	521610
	521648
	522805
	523120
	523557
	524280
	524709
	525027
	525431
	525671
	526332
	526461
	526781
	527604
	528248
	528982
	530235
	530426
	530493
	530539
	531138
	531841
	532197
	532244
	532483
	532668
	533147
	533897
	534555
	535779
	536711
	536945
	537262
	537977
	538301
	538481
	539210
	539229
	539437
	539618
	539688
	539833
	539867
	540454
	540604
	540618
	540834
	541029
	541065
	542140
	542320
	542342
	542461
	542532
	542752
	542862
	543799
	544541
	544764
	545649
	545664
	546673
	546928
	548057
	549128
	550387
	550738
	550867
	550924
	551594
	551710
	551756
	551812
	552583
	552785
	552921
	553062
	553491
	553499
	554865
	555234
	555812
	555886
	556183
	556699
	558221
	558632
	558739
	559157
	559480
	559632
	559992
	560385
	560458
	560506
	560700
	561638
	561827
	562000
	562188
	562473
	562560
	562753
	563040
	563074
	563306
	563593
	564522
	564826
	565314
	565406
	565490
	565821
	566881
	567093
	567968
	568252
	568691
	568884
	569163
	569983
	570808
	570927
	570933
	571045
	571351
	571600
	572346
	572560
	573602
	573638
	575021
	575087
	575267
	575369
	575404
	575528
	575529
	576166
	576684
	577071
	577523
	577895
	578144
	578155
	578538
	578595
	578856
	579321
	579469
	580043
	580142
	580600
	581058
	581960
	582005
	582509
	583007
	583098
	583465
	584962
	585124
	585208
	585223
	585312
	585946
	586303
	586500
	586922
	587541
	587556
	588199
	588274
	588651
	588916
	589114
	590293
	590409
	590916
	591142
	591928
	592264
	592718
	593318
	593858
	594003
	594758
	594798
	594902
	594909
	594970
	595704
	596997
	597229
	598536
	598842
	598980
	599123
	599167
	601412
	602018
	602201
	602844
	602907
	603437
	604124
	604316
	605152
	605489
	606222
	606618
	607942
	609182
	611021
	611189
	611744
	611892
	611922
	612082
	612413
	613840
	614722
	614921
	615027
	615481
	615758
	615867
	616152
	616196
	616671
	617230
	617311
	618713
	619850
	620230
	621015
	621787
	624745
	625284
	625472
	627074
	627150
	627817
	628019
	628296
	628450
	628469
	629269
	630386
	630761
	630783
	632572
	633402
	633613
	633912
	636283
	636937
	637047
	637444
	637845
	638276
	638360
	639084
	639449
	639762
	642190
	643294
	643305
	644011
	644125
	644388
	644684
	645059
	646228
	646334
	646378
	646959
	647416
	647609
	648374
	649009
	649516
	650980
	651069
	651383
	651647
	652366
	653439
	654761
	655925
	656981
	657427
	657757
	658408
	659875
	661332
	661723
	662206
	663384
	663804
	664103
	665142
	665146
	665234
	665332
	665973
	666270
	666726
	667319
	668188
	668389
	668436
	668818
	668839
	670786
	671278
	671280
	671950
	672036
	672820
	673264
	674381
	674524
	674693
	675016
[truncated: 816 more rows]

## Sheet: Figure 2 supplement 2c
	Intensities		Total # particle		frequence
	493103		3507	0	0
	8.37301e+06			25000	0
	8.23522e+06			50000	0
	8.17031e+06			75000	1
	7.82489e+06			100000	10
	6.70512e+06			125000	22
	5.3876e+06			150000	31
	5.25593e+06			175000	62
	5.1277e+06			200000	85
	5.05835e+06			225000	77
	4.98372e+06			250000	94
	4595279			275000	114
	4.52686e+06			300000	117
	4525940			325000	121
	4.29327e+06			350000	128
	4.1871e+06			375000	121
	4166253			400000	114
	4.15795e+06			425000	120
	4.03449e+06			450000	102
	3.91359e+06			475000	118
	3.89482e+06			500000	113
	3.88873e+06			525000	118
	3868884			550000	105
	3.81493e+06			575000	80
	3.70614e+06			600000	90
	3.64248e+06			625000	96
	3.60045e+06			650000	66
	3.43481e+06			675000	56
	3.39326e+06			700000	57
	3.35344e+06			725000	53
	3.30397e+06			750000	44
	3.30143e+06			775000	63
	3301071			800000	53
	3.24086e+06			825000	43
	3.1983e+06			850000	60
	3163814			875000	51
	3.15972e+06			900000	36
	3134230			925000	46
	3.08288e+06			950000	34
	3.07832e+06			975000	32
	3.0402e+06			1000000	34
	3.03834e+06			1025000	34
	3.03315e+06			1050000	30
	2.95188e+06			1075000	24
	2.94823e+06			1100000	32
	2.94667e+06			1125000	21
	2.9355e+06			1150000	29
	2.92125e+06			1175000	24
	2.91945e+06			1200000	15
	2908271			1225000	20
	2.88823e+06			1250000	21
	2.82377e+06			1275000	19
	2.81055e+06			1300000	17
	2.79107e+06			1325000	23
	2.79004e+06			1350000	9
	2758063			1375000	19
	2751728			1400000	25
	2.75096e+06			1425000	16
	2739695			1450000	19
	2738303			1475000	10
	2.72807e+06			1500000	10
	2.70587e+06			1525000	20
	2.68429e+06			1550000	10
	2.68138e+06			1575000	10
	2.68138e+06			1600000	10
	2.67345e+06			1625000	8
	2.63518e+06			1650000	12
	2.62249e+06			1675000	7
	2.61869e+06			1700000	9
	2.59828e+06			1725000	9
	2.59642e+06			1750000	14
	2584115			1775000	14
	2.54934e+06			1800000	8
	2.54578e+06			1825000	5
	2527837			1850000	4
	2.52021e+06			1875000	4
	2491976			1900000	10
	2.49167e+06			1925000	4
	2.4852e+06			1950000	3
	2.48419e+06			1975000	4
	2.48193e+06			2000000	7
	2.47944e+06			2025000	4
	2472855			2050000	6
	2461161			2075000	1
	2.44394e+06			2100000	6
	2.43685e+06			2125000	3
	2.43685e+06			2150000	6
	2.43597e+06			2175000	3
	2.43463e+06			2200000	5
	2418204			2225000	1
	2412018			2250000	6
	2.39739e+06			2275000	1
	2379554			2300000	5
	2.37576e+06			2325000	5
	2366267			2350000	3
	2.35959e+06			2375000	3
	2.35565e+06			2400000	3
	2.34674e+06			2425000	2
	2332366			2450000	5
	2331441			2475000	2
	2322955			2500000	6
	2.31379e+06			2525000	1
	2312685			2550000	3
	2.30807e+06			2575000	0
	2.30225e+06			2600000	3
	2.29865e+06			2625000	2
	2.28996e+06			2650000	1
	2.28326e+06			2675000	1
	2280127			2700000	3
	2.27631e+06			2725000	1
	2.2664e+06			2750000	3
	2241419			2775000	3
	2.23457e+06			2800000	2
	2.23428e+06			2825000	2
	2.23297e+06			2850000	0
	2.22567e+06			2875000	0
	2.22508e+06			2900000	1
	2202228			2925000	3
	2.19469e+06			2950000	3
	2.19198e+06			2975000	1
	2.18672e+06			3000000	0
	2.18545e+06			3025000	0
	2.17604e+06			3050000	3
	2173785			3075000	0
	2.16581e+06			3100000	2
	2155757			3125000	0
	2.1497e+06			3150000	1
	2.14451e+06			3175000	2
	2137375			3200000	1
	2.13353e+06			3225000	0
	2129681			3250000	1
	2.1282e+06			3275000	0
	2.11311e+06			3300000	0
	2.10861e+06			3325000	3
	2106799			3350000	0
	2.09741e+06			3375000	1
	2.09572e+06			3400000	1
	2.09399e+06			3425000	0
	2093823			3450000	1
	2.09179e+06			3475000	0
	2.08357e+06			3500000	0
	2064752			3525000	0
	2040241			3550000	0
	2.03457e+06			3575000	0
	2.03327e+06			3600000	0
	2.0319e+06			3625000	1
	2.02911e+06			3650000	1
	2.02774e+06			3675000	0
	2.0212e+06			3700000	0
	2.0183e+06			3725000	1
	2016309			3750000	0
	2.00438e+06			3775000	0
	1.99862e+06			3800000	0
	1996957			3825000	1
	1.99031e+06			3850000	0
	1.988e+06			3875000	1
	1.98449e+06			3900000	2
	1977590			3925000	1
	1976407			3950000	0
	1.96529e+06			3975000	0
	1.96071e+06			4000000	0
	1958217			4025000	0
	1953684			4050000	1
	1942140			4075000	0
	1934339			4100000	0
	1928956			4125000	0
	1.91082e+06			4150000	0
	1.90949e+06			4175000	2
	1.90799e+06			4200000	1
	1.90739e+06			4225000	0
	1.89947e+06			4250000	0
	1.89394e+06			4275000	0
	1.8888e+06			4300000	1
	1.88798e+06			4325000	0
	1.88644e+06			4350000	0
	1884700			4375000	0
	1.88443e+06			4400000	0
	1.87949e+06			4425000	0
	1.87904e+06			4450000	0
	1878116			4475000	0
	1.86108e+06			4500000	0
	1860124			4525000	0
	1.85651e+06			4550000	2
	1855589			4575000	0
	1.83957e+06			4600000	1
	1.82786e+06			4625000	0
	1.82582e+06			4650000	0
	1825089			4675000	0
	1.82412e+06			4700000	0
	1.82233e+06			4725000	0
	1.81046e+06			4750000	0
	1809014			4775000	0
	1.80339e+06			4800000	0
	1.79552e+06			4825000	0
	1789435			4850000	0
	1.78809e+06			4875000	0
	1.78745e+06			4900000	0
	1.78455e+06			4925000	0
	1784141			4950000	0
	1.77935e+06			4975000	0
	1.77935e+06			5000000	1
	1.77437e+06			5025000	0
	1772332			5050000	0
	1769032			5075000	1
	1768207			5100000	0
	1.76762e+06			5125000	0
	1.76697e+06			5150000	1
	1.7661e+06			5175000	0
	1765736			5200000	0
	1.76213e+06			5225000	0
	1.76059e+06			5250000	0
	1757907			5275000	1
	1.75771e+06			5300000	0
	1.75375e+06			5325000	0
	1.75123e+06			5350000	0
	1.74616e+06			5375000	0
	1741832			5400000	1
	1.74166e+06			5425000	0
	1.7394e+06			5450000	0
	1.73852e+06			5475000	0
	1.73845e+06			5500000	0
	1.73754e+06			5525000	0
	1.73469e+06			5550000	0
	1.73137e+06			5575000	0
	1.73105e+06			5600000	0
	1.72956e+06			5625000	0
	1727816			5650000	0
	1.72645e+06			5675000	0
	1725755			5700000	0
	1.72275e+06			5725000	0
	1.72136e+06			5750000	0
	1.71691e+06			5775000	0
	1.71175e+06			5800000	0
	1709889			5825000	0
	1.70597e+06			5850000	0
	1.70257e+06			5875000	0
	1.70144e+06			5900000	0
	1.70126e+06			5925000	0
	1699649			5950000	0
	1.69626e+06			5975000	0
	1.69559e+06			6000000	0
	1.69486e+06			6025000	0
	1.69485e+06			6050000	0
	1687683			6075000	0
	1683302			6100000	0
	1.67939e+06			6125000	0
	1.67876e+06			6150000	0
	1.67453e+06			6175000	0
	1.67365e+06			6200000	0
	1.67032e+06			6225000	0
	1666348			6250000	0
	1655142			6275000	0
	1654351			6300000	0
	1.65259e+06			6325000	0
	1643448			6350000	0
	1.64279e+06			6375000	0
	1.64267e+06			6400000	0
	1.64249e+06			6425000	0
	1.63927e+06			6450000	0
	1636177			6475000	0
	1.63467e+06			6500000	0
	1.63372e+06			6525000	0
	1.63285e+06			6550000	0
	1.63055e+06			6575000	0
	1.6291e+06			6600000	0
	1.62653e+06			6625000	0
	1.62488e+06			6650000	0
	1624361			6675000	0
	1.62182e+06			6700000	0
	1.62154e+06			6725000	1
	1.62041e+06			6750000	0
	1.61392e+06			6775000	0
	1.61027e+06			6800000	0
	1600458			6825000	0
	1598207			6850000	0
	1595096			6875000	0
	1.59106e+06			6900000	0
	1.5872e+06			6925000	0
	1582318			6950000	0
	1.58007e+06			6975000	0
	1.57849e+06			7000000	0
	1.57698e+06			7025000	0
	1.57601e+06			7050000	0
	1.57561e+06			7075000	0
	1.57474e+06			7100000	0
	1.57463e+06			7125000	0
	1.5687e+06			7150000	0
	1.568e+06			7175000	0
	1565971			7200000	0
	1558825			7225000	0
	1555505			7250000	0
	1.55476e+06			7275000	0
	1.55248e+06			7300000	0
	1.55228e+06			7325000	0
	1.54748e+06			7350000	0
	1.54246e+06			7375000	0
	1538369			7400000	0
	1.53806e+06			7425000	0
	1.53516e+06			7450000	0
	1.53292e+06			7475000	0
	1.52907e+06			7500000	0
	1526675			7525000	0
	1.52665e+06			7550000	0
	1.52512e+06			7575000	0
	1.52369e+06			7600000	0
	1.5232e+06			7625000	0
	1.52309e+06			7650000	0
	1.52076e+06			7675000	0
	1.52033e+06			7700000	0
	1519355			7725000	0
	1.51884e+06			7750000	0
	1517561			7775000	0
	1.51514e+06			7800000	0
	1513488			7825000	1
	1512662			7850000	0
	1.51122e+06			7875000	0
	1.51027e+06			7900000	0
	1506249			7925000	0
	1.50302e+06			7950000	0
	1.50299e+06			7975000	0
	1.5014e+06			8000000	0
	1501062			8025000	0
	1.50094e+06			8050000	0
	1.5002e+06			8075000	0
	1497684			8100000	0
	1492636			8125000	0
	1.49063e+06			8150000	0
	1487223			8175000	1
	1.48675e+06			8200000	0
	1.48586e+06			8225000	0
	1.48423e+06			8250000	1
	1.48321e+06			8275000	0
	1476803			8300000	0
	1.47611e+06			8325000	0
	1.47302e+06			8350000	0
	1.47146e+06
	1471441
	1.471e+06
	1.46732e+06
	1463463
	1.46094e+06
	1.46025e+06
	1.4594e+06
	1.45357e+06
	1448572
	1446715
	1.44405e+06
	1442748
	1.44181e+06
	1.43981e+06
	1.4398e+06
	1439707
	1.43894e+06
	1.43871e+06
	1.43717e+06
	1.43654e+06
	1433115
	1433111
	1431206
	1429414
	1.42936e+06
	1.42827e+06
	1.42764e+06
	1.42025e+06
	1.41895e+06
	1.41808e+06
	1.41421e+06
	1412920
	1412093
	1411270
	1.41087e+06
	1.41051e+06
	1.40778e+06
	1.40743e+06
	1405086
	1404367
	1.40229e+06
	1.40193e+06
	1.40113e+06
	1399810
	1.39877e+06
	1.39701e+06
	1.39664e+06
	1.39533e+06
	1.39505e+06
	1394783
	1.39296e+06
	1.39256e+06
	1.39183e+06
	1.39066e+06
	1390249
	1389837
	1389422
	1389011
	1.38784e+06
	1.38522e+06
	1385096
	1.38267e+06
	1379118
	1377058
	1376384
	1.37564e+06
	1375603
	1375389
	1373432
	1.37341e+06
	1372849
	1.37279e+06
	1.36882e+06
	1.3684e+06
	1367885
	1.36621e+06
	1.36481e+06
	1364174
	1363806
	1359996
	1.35986e+06
	1.35898e+06
	1.35767e+06
	1.35709e+06
	1.35636e+06
	1350573
	1.35019e+06
	1.34911e+06
	1.34753e+06
	1.34451e+06
	1341688
	1338480
	1333492
	1332137
	1.32907e+06
	1.32825e+06
	1.32466e+06
	1.32371e+06
	1321416
	1.32051e+06
	1319356
	1318733
	1316967
	1.31601e+06
	1.31578e+06
	1.31504e+06
	1314649
	1.31192e+06
	1.31142e+06
	1.30964e+06
	1.30932e+06
	1.30795e+06
	1307522
	1.30735e+06
	1.3048e+06
	1.304e+06
	1303092
	1.30199e+06
	1.30094e+06
	1.29961e+06
	1299573
	1.29651e+06
	1.29481e+06
	1293800
	1.28983e+06
	1.28915e+06
	1288854
	1.286e+06
	1284276
	1.28376e+06
	1.28355e+06
	1283030
	1.28049e+06
	1278139
	1276663
	1276315
	1.27362e+06
	1.27258e+06
	1.27139e+06
	1.26988e+06
	1268621
	1.26792e+06
	1266900
	1.26608e+06
	1.26484e+06
	1.2577e+06
	1.25644e+06
	1.25572e+06
	1.25546e+06
	1.25284e+06
	1252036
	1.25151e+06
	1.25151e+06
	1251507
	1.25011e+06
	1249699
	1.24949e+06
	1247276
	1246814
	1.24583e+06
	1.24432e+06
	1.24313e+06
	1.24119e+06
	1240087
	1.23889e+06
	1238611
	1.23709e+06
	1236886
	1.23562e+06
	1.23519e+06
	1.23435e+06
	1.23271e+06
	1.23164e+06
	1230266
	1.23017e+06
	1.22701e+06
	1.2249e+06
	1224657
	1222798
	1.2225e+06
	1.21898e+06
	1218281
	1216076
	1.21563e+06
	1.21553e+06
	1.21528e+06
	1214661
	1.21435e+06
	1.21302e+06
	1.21187e+06
	1.2095e+06
	1207424
	1207325
	1206833
	1.20378e+06
	1.20172e+06
	1.19967e+06
	1197766
	1.19761e+06
	1.19579e+06
	1.19378e+06
	1.19197e+06
	1190627
	1190347
	1.18655e+06
	1.1837e+06
	1.18303e+06
	1.18137e+06
	1180523
	1.17873e+06
	1175438
	1172623
	1.17183e+06
	1.17133e+06
	1.17068e+06
	1169327
	1168501
	1166853
	1.16409e+06
	1163554
	1160132
	1159018
	1.15882e+06
	1.15798e+06
	1.15717e+06
	1157066
	1.15611e+06
	1.15328e+06
	1152782
	1151509
	1.15137e+06
	1151188
	1.15078e+06
	1.15076e+06
	1150667
	1149951
	1147636
	1145419
	1.14506e+06
	1.14425e+06
	1.14348e+06
	1.14294e+06
	1142123
	1141998
	1.14086e+06
	1140372
	1.13915e+06
	1.13813e+06
	1.13804e+06
	1.13702e+06
	1.13696e+06
	1.13594e+06
	1135531
	1.135e+06
	1.13472e+06
	1.13337e+06
	1133056
	1132399
	1129949
	1.12987e+06
	1.1276e+06
	1.12709e+06
	1.12608e+06
	1125223
	1.12495e+06
	1124809
	1.12424e+06
	1.12421e+06
	1.12421e+06
	1122678
	1.12141e+06
	1.12119e+06
	1.11245e+06
	1.10945e+06
	1109148
	1108945
	1.10767e+06
	1107087
	1.10495e+06
	1103945
	1103377
	1.10133e+06
	1100631
	1.10043e+06
	1.10032e+06
	1099552
	1.09775e+06
	1097607
	1.09724e+06
	1.09613e+06
	1094949
	1.09448e+06
	1.09442e+06
	1093899
	1.09349e+06
	1.09246e+06
	1092249
	1091838
	1091015
	1.09023e+06
	1.08982e+06
	1.08943e+06
	1.08883e+06
	1.0887e+06
	1.08678e+06
	1085654
	1085598
	1.08554e+06
	1.08412e+06
	1084007
	1.08358e+06
	1.08223e+06
	1.08086e+06
	1.07882e+06
	1078159
	1.07754e+06
	1.0751e+06
	1.07476e+06
	1074528
	1.07444e+06
	1074114
	1.07208e+06
	1.0704e+06
	1.07033e+06
	1.06626e+06
	1065045
	1.06395e+06
	1.06283e+06
	1.06261e+06
	1062573
	1062164
	1061337
	1059973
	1059548
	1.0593e+06
	1058005
	1056488
	1.05641e+06
	1053919
	1053919
	1051729
	1049797
	1048972
	1048971
	1048556
	1.04758e+06
	1.04604e+06
	1.04527e+06
	1044027
	1043963
	1041792
	1039491
	1.03941e+06
	1.03773e+06
	1037356
	1036193
	1.03584e+06
	1.03525e+06
	1034608
	1.03414e+06
	1.03315e+06
	1030802
	1030011
	1.02959e+06
	1.02957e+06
	1028776
	1028775
	1.02872e+06
	1.02827e+06
	1028054
	1027005
	1024932
	1024429
	1023191
	1.02277e+06
	1.02218e+06
	1.02206e+06
	1.02197e+06
	1.02074e+06
	1019709
	1.01881e+06
	1018471
	1018469
	1016994
	1.0165e+06
	1.01592e+06
	1014592
	1.01354e+06
	1.01194e+06
	1.00942e+06
	1008991
	1007334
	1007285
	1.00607e+06
	1005693
	1004166
	1.00395e+06
	1.00331e+06
	1003229
	1.00208e+06
	1001984
	1000994
	1.0008e+06
	1000336
	1.00004e+06
	998735
	998035
	997449
	997037
	996612
	996150
	995798
	995154
	994324
	993643
	992117
	991030
	990855
	990686
	989618
	988161
	987971
	985853
	985087
	984262
	984110
	983849
	981785
	981370
	980551
	980319
	979726
	979445
	978317
	978205
	977983
	977728
	976532
	975605
	973719
	973040
	970433
	970246
	967042
	966951
	966538
	965773
	965015
	963655
	963315
	963239
	962873
	962516
	962419
	961973
	960708
	957818
	957815
	957532
	957469
	957019
	956705
	956190
	954960
	954272
	954172
	953159
	952238
	952111
	950630
	950051
	949330
	948927
	947886
	946661
	945607
	945183
	943976
	943458
	943433
	942650
	941471
	941376
	940957
	940919
	940574
	938450
	938207
	937797
	937476
	936222
	935212
	934400
	933009
	932392
	931904
	930364
	930267
	928907
	928310
	927988
	927214
	926354
	926050
	925537
	923786
	923041
	922186
	922024
	921788
	920252
	920093
	918758
	918599
	917913
	916865
	916160
	915003
	914191
	912793
	911227
	910991
	910936
	910615
	910269
	909191
	908656
	908541
	908496
	908421
	908101
	907880
	907185
	905948
	905556
	905457
	905172
	903221
	903151
	903064
	901828
	901828
	901634
	901570
	901424
	901417
	901211
	900591
	900181
	900158
	900044
	899749
	897698
	897241
	897233
	896770
	896057
	894797
	893964
	892966
	890320
	890286
	889640
	889060
	888227
	888226
	887764
	885356
	884628
	884195
	883280
	883130
	882865
	882393
	880983
	880232
	879570
	879569
	878926
	878745
	878153
	877117
	877097
	876685
	876332
	875928
	875859
	874815
	874624
	874532
	874437
	874316
	873800
	873644
	872563
	872250
	871972
	871735
	871326
	870559
	870505
	870316
	870168
	870086
	869954
	869933
	868744
	868029
	867616
	867206
	866793
	866539
	865695
	865554
	865371
	865248
	863907
	861903
	861846
	860613
	859786
	857808
	857554
	857029
	854524
	853683
	853518
	853431
	852684
	851954
	851679
	851528
	851066
	850402
	850308
	850306
	850306
	850023
	849598
	849311
	849069
	848625
	848574
	848515
	848018
	848001
	847848
	847649
	847200
	847044
	846755
	846515
	846017
	846000
	844931
	844668
	844536
	844536
	844536
	844213
	843921
	841650
	841648
	841267
	840824
	839748
	839549
	839411
	839269
	837714
	837528
	836420
	835944
	835467
	834778
	833986
	833821
	833230
	832711
	832489
	832172
	832170
	831512
	830934
	830934
	830812
	830185
	830050
	829442
	829161
	828965
	828714
	827097
	826907
	826810
	826262
	825529
	825163
	822277
	821820
	821760
	820013
	819394
	818863
	817542
	816860
	816404
	816362
	815301
	814988
	813529
	812799
	812627
	812586
	812005
	810865
	810792
	810616
	810099
	809914
	809284
	809246
	808677
	807028
	806796
	806233
	806203
	805657
	805381
	805316
	804557
	804451
	803774
	803688
	803528
	803173
	802276
	802053
	800434
	800045
	800045
	799738
	799660
	799255
	799022
	798471
	798430
	798256
	798143
	797959
	797655
	797551
	797282
	797198
	794983
	794700
	793838
	793837
	793688
	793016
	792303
	789912
	789716
	789715
	788540
	787899
	787657
	786906
	786831
	786211
	786210
	786205
	786007
	785887
	784935
	784469
	783912
	783396
	783128
	783122
	783037
	782824
	782193
	781474
	780948
	779412
	779002
	777940
	777765
	777764
	777098
	776829
	775216
	775165
	774879
	774162
	774031
	773925
	773232
	773127
	772635
	772196
	771622
	771580
	771451
	771195
	771044
	770981
	770757
	770755
	769710
	768913
	768793
	768592
	767457
	765910
	765888
	764986
	764892
	764858
	764163
	764111
	763829
	763725
	762705
	762604
	762515
	761785
	760894
	760838
	760590
	760453
	760188
	760042
	760040
	758391
	758198
	757570
	757443
	756375
	755919
	755886
	755489
	755348
	754234
	754208
	753651
	751854
	751812
	751799
	751659
	751120
	751116
	751012
	751004
	750974
	750149
	749983
	749694
	748984
	748913
	748578
	748088
	746693
	746644
	745786
	745615
	745053
	744792
	743965
	743927
	742879
	742613
	740836
	740254
	739846
	739618
	739135
	737974
	737584
	737571
	736674
	735208
	734944
	734899
	734836
	734076
	733486
	733249
	733248
	732198
	732135
	731381
	730090
	729987
	729669
	729522
	728134
	726654
	725828
	725007
	724055
	723844
	723331
	722946
	722718
	721782
	721506
	721146
	719236
	719236
	719235
	718859
	718825
	718713
	717587
	717208
	716762
	716444
	716347
	715725
	714702
	714231
	712229
	712054
	711972
	711512
	711370
	711165
	710526
	709758
	709344
	707695
	707694
	707528
	706903
	706459
	706048
	706046
	705839
	705222
	704968
	704175
	703974
	703970
	703676
	702750
	702368
	702337
	700689
	700672
	700608
	700277
	700052
	699865
	699742
	699451
	698898
	698627
	698045
	697803
	697392
	697390
	696981
	696258
	696256
	696246
	696156
	695633
	694095
	693682
	692875
	692856
	692643
	692444
	692225
	691923
	691648
	690795
	689969
	689874
	689560
	689246
	689215
	689148
	688818
	688680
	688320
	687484
	685027
	684834
	684814
	683278
	683172
	682884
	682347
	680928
	680841
	679257
	678843
	678179
	678141
	678112
	676624
	676609
	676585
	676369
	676369
	676312
	675958
	675400
	673486
	673052
	672953
	672337
	671887
	671776
	671422
	671417
	671357
	671114
	670925
	670861
	670779
	670149
	669858
	669775
	669650
	669363
	669362
	668248
	667824
	666888
	666565
	666478
	666056
	664846
	664830
	664441
	663594
	663336
	663180
	661944
	661617
	660709
	659883
	659060
	658652
	658624
	658400
	658236
	658164
	657885
	657619
	657253
	656999
	656404
	654527
	654501
	654474
	653036
	652877
	652464
	652391
	652351
	651548
	650924
	649218
	648756
	648557
	648342
	647861
	647525
	646694
	645707
	645045
	644633
	644546
	644141
	643809
	643087
	642984
	641750
	641746
	641335
	641171
	640923
	640876
	640260
	640099
	639915
	639477
	639298
	639277
	638419
	638039
	637269
	637215
	637213
	635976
	635678
	634546
	634267
	632729
	632608
	632536
	632339
	632314
	632266
	632097
	631517
	631476
	631126
	631038
	631037
	630882
	630367
	630252
	630079
	630045
	629795
	629596
	629271
	628090
	628065
	626913
	626811
	626656
	626311
	626083
	625642
	625298
	625260
	624722
	624435
	624342
	624140
	624058
	624025
	624024
	623876
	623611
	623611
	623409
	622788
	622451
	622375
	621966
	621845
	621720
	621523
	621004
	620917
	620730
	620727
	620315
	619904
	619624
	619262
	619199
	619079
	618976
	618753
	618666
	618141
	617917
	617430
	617429
	616987
	616794
	616433
	615818
	615747
	615607
	615395
	615379
	615370
	615168
	614966
	614956
	614438
	614026
	613722
	613720
	613311
	613002
	612894
	612484
	612147
	612073
	611818
	611799
	610834
	610010
	609645
	609599
	609338
	608776
	608364
	608051
	607620
	607575
	607538
	607222
	607126
	606516
	605971
	605886
	605605
	605314
	605174
	604890
	604294
	603973
	603829
	603595
	603339
	603135
	603006
	603006
	603004
	602983
	601980
	601683
	600662
	600529
	600442
	600170
	600117
	599708
	599652
	599294
	598693
	598536
	598471
	598470
	598294
	597646
	597235
	597235
	597201
	597147
	596824
	596822
	596820
	596793
	596693
	596466
	596161
	595419
	594504
	594252
	593833
	593525
	593112
	593111
	592829
	591928
	591876
	591673
	591258
	591150
	590660
	590372
	590302
	589521
	588990
	588579
	588358
	588174
	588169
	588084
	587343
	586518
	586326
	586220
	585694
	585205
	585164
	584870
	584868
	584828
	584456
	584303
	583946
	583806
	583271
	583219
	582839
	582475
	582321
	582302
	581984
	581573
	581571
	581569
	581510
	581240
	581161
	581020
	580748
	580747
	579926
	579921
	579098
	578966
	578864
	578718
	578559
	578489
	578377
	578340
	577688
	577390
	576435
	576384
	576211
	575800
	575792
	574977
	574917
	574850
	574597
	574153
	573962
	573448
	573262
	572950
	572091
	572090
	572089
	572089
	572059
	571267
	571021
	570789
	570448
	570443
	570122
	570029
	568399
	568381
	567532
	567147
	567145
	566732
	566639
	565380
	565015
	564672
	563730
	563599
	562611
	562187
	561787
	561699
	561593
	561373
	561112
	561064
	560965
	560963
	560664
	560554
	560175
	560139
	560019
	560019
	559372
	558489
	558078
	558077
	558077
	557890
	556396
	555878
	555772
	555604
	555160
	554933
	554780
	554728
	554368
	554086
	553956
	553955
	553926
	553210
	552832
	552768
	552608
	552430
	551972
	551893
	551684
	551483
	551339
	550917
	550656
	549835
	549421
	549368
	549366
	549010
	549009
	548802
	548055
	547913
	547773
	547772
	547772
	547730
	546037
	545988
	545671
	545426
	544359
	544160
	543990
	543942
	543755
	543427
	542193
	542120
	542002
	541655
	541591
	541520
	540973
	540938
	540898
	540355
	540353
	539820
	539718
	539622
	539304
	539176
	538705
	538655
	538294
	537469
	537467
	537385
	537381
	537350
	537326
	537059
	536769
	536676
	536609
	536409
	536252
	536231
	536119
	535821
	535696
	535407
	534638
	534583
	534485
	534310
	533949
	533761
	533627
	533347
	533160
	532903
	532735
	532112
	532112
	531699
	531699
	531287
	530619
	530462
	530462
	530354
	530051
	529973
	529639
	529637
	529226
	529139
	528814
	528640
	528402
	528401
	527989
	527988
	527972
	527166
	526817
	526815
	526753
	526341
	526340
	526328
	526218
	525978
	525928
	525517
	525315
	525102
	524803
	524693
	524607
	524490
	524224
	524053
	523869
	523759
	523043
	523017
	522816
	522780
	522631
	522623
	521808
	521807
	521394
	520897
	520570
	520474
	520158
	520158
	519977
	519840
	519746
	519745
	519745
	519416
	519408
	519333
	518724
	518098
	518098
	518098
	517943
	517939
	517824
	517753
	517372
	517272
	516455
	516449
	516332
	516071
	515650
	515403
	515191
	514853
	514801
	514800
	514554
	514214
	513974
	513949
	513565
	513347
	513076
	513076
	512724
	512653
	512650
	512374
	512327
	512326
	512312
	512155
	511915
	511913
	511684
	511205
	511134
	511091
	511088
	510679
	510677
	510559
	510454
	510268
	510267
	510265
	508618
	508618
	508579
	507903
	507795
	507402
	507395
	507368
	506557
	506481
	506269
	505730
	505623
	505460
	505430
	504496
	504465
	504404
	504277
	504084
	503766
	503671
	503452
	503262
	503257
	503169
	503055
	502847
	502717
	502716
	502100
	501903
	501694
	501626
	501610
	500921
	500454
	500080
	499586
	499250
	499131
	498912
	498728
	498162
	497901
	497829
	497602
	497490
	497488
	497119
	497077
	496666
	495840
	495839
	495563
	495428
	495426
	495316
	494675
	494603
	494191
	493780
	493764
	493534
	493476
	493414
	493367
	493367
	492834
	492726
	492568
	492544
	492544
	492543
	492045
	491722
	491722
	491718
	491716
[truncated: 1,508 more rows]

## Sheet: Figure 2 Supplement 3a
	Intensities			Frequence
	178.836		0	0
	127.544		10	0
	119.479		20	0
	163.785		30	0
	237.492		40	0
	150.676		50	0
	128.811		60	0
	429.633		70	0
	598.333		80	0
	143.426		90	0
	298.881		100	167
	139.709		110	272
	244.447		120	252
	188.163		130	273
	127.582		140	207
	212.759		150	130
	687.42		160	123
	115.131		170	111
	392.559		180	112
	206.339		190	123
	342.987		200	105
	121.216		210	123
	1358.61		220	131
	767.543		230	114
	332.455		240	132
	186.778		250	127
	361.795		260	126
	316.061		270	104
	277.559		280	109
	136.661		290	107
	296.126		300	99
	141.16		310	90
	131.131		320	82
	340.175		330	78
	373.33		340	91
	210.735		350	59
	144.45		360	61
	355.916		370	38
	166.636		380	38
	122.656		390	31
	132.048		400	25
	249.203		410	26
	348.57		420	24
	237.965		430	15
	118.399		440	17
	166.595		450	12
	118.06		460	17
	136.303		470	11
	198.585		480	10
	332.952		490	5
	176.992		500	3
	135.846		510	4
	162.244		520	4
	173.807		530	2
	125.866		540	5
	306.86		550	4
	125.754		560	4
	269.611		570	4
	238.157		580	2
	123.849		590	2
	147.569		600	2
	220.143		610	1
	261.257		620	4
	186.69		630	2
	237.219		640	2
	207.071		650	3
	1361.43		660	1
	218.677		670	2
	121.223		680	4
	336.052		690	4
	178.434		700	0
	156.338		710	1
	204.174		720	1
	293.471		730	1
	166.957		740	1
	466.139		750	3
	213.009		760	1
	307.175		770	2
	147.992		780	1
	174.083		790	3
	187.006		800	2
	163.547		810	1
	275.373		820	0
	145.03		830	4
	362.984		840	2
	125.305		850	1
	175.277		860	1
	193.064		870	1
	291.19		880	1
	155.541		890	1
	314.757		900	1
	194.71		910	1
	193.721		920	0
	303.124		930	0
	341.128		940	0
	321.343		950	1
	427.416		960	1
	128.432		970	2
	354.555		980	1
	273.121		990	1
	136.726		1000	0
	213.084		1010	0
	286.465		1020	0
	184.005		1030	2
	160.635		1040	0
	126.672		1050	1
	138.598		1060	1
	263.346		1070	0
	471.799		1080	0
	166.519		1090	1
	210.71		1100	1
	327.211		1110	1
	139.719		1120	1
	342.881		1130	0
	171.622		1140	0
	388.127		1150	1
	268.449		1160	0
	560.163		1170	1
	256.89		1180	1
	338.308		1190	0
	302.838		1200	0
	471.066		1210	0
	325.005		1220	0
	291.973		1230	0
	187.535		1240	0
	240.186		1250	2
	293.403		1260	0
	133.688		1270	0
	186.055		1280	0
	120.145		1290	0
	330.612		1300	1
	636.577		1310	0
	347.638		1320	0
	235.116		1330	2
	133.881		1340	0
	302.821		1350	0
	115.383		1360	1
	260.347		1370	1
	128.791		1380	0
	270.228		1390	0
	423.398		1400	0
	389.752		1410	1
	200.491		1420	0
	299.987		1430	0
	128.74		1440	0
	274.91		1450	0
	176.369		1460	0
	226.953		1470	0
	285.348		1480	0
	122.27		1490	0
	267.543		1500	0
	121.671		1510	0
	131.835		1520	0
	119.437		1530	0
	187.106		1540	0
	133.84		1550	0
	498.521		1560	0
	156.632		1570	0
	237.356		1580	0
	172.155		1590	0
	824.172		1600	0
	414.683		1610	0
	222.836		1620	0
	405.382		1630	0
	409.399		1640	1
	116.077		1650	0
	194.29		1660	0
	304.772		1670	0
	115.051		1680	0
	366.818		1690	0
	164.855		1700	0
	127.82		1710	0
	198.814		1720	0
	130.569		1730	0
	320.181		1740	0
	130.005		1750	0
	204.603		1760	0
	315.105		1770	0
	286.412		1780	0
	326.126		1790	0
	211.063		1800	0
	447.255		1810	0
	343.566		1820	0
	641.003		1830	0
	262.357		1840	0
	537.988		1850	0
	206.302		1860	0
	126.703		1870	0
	257.679		1880	0
	226.996		1890	0
	234.398		1900	0
	312.418		1910	0
	340.84		1920	0
	135.564		1930	0
	116.08		1940	0
	179.621		1950	0
	155.962		1960	0
	756.119		1970	0
	130.022		1980	0
	234.896		1990	0
	256.404		2000	0
	147.266		2010	0
	298.233		2020	0
	237.027		2030	0
	287.346		2040	0
	246.373		2050	0
	286.594		2060	0
	150.382		2070	0
	174.278		2080	0
	117.463		2090	0
	362.182		2100	0
	123.276		2110	0
	126.393		2120	0
	429.992		2130	0
	115.222		2140	0
	118.407		2150	0
	135.219		2160	0
	154.309		2170	0
	117.665		2180	0
	135.854		2190	0
	125.455		2200	0
	137.982		2210	0
	246.566		2220	0
	201.78		2230	0
	145.934		2240	0
	137.13		2250	0
	176.827		2260	0
	128.39		2270	0
	122.249		2280	0
	149.484		2290	0
	162.574		2300	0
	333.42		2310	0
	131.416		2320	0
	137.543		2330	0
	120.228		2340	0
	142.022		2350	0
	466.633		2360	0
	130.419		2370	0
	204.471		2380	0
	127.231		2390	0
	124.515		2400	0
	193.937		2410	0
	172.865		2420	0
	264.07		2430	0
	141.516		2440	0
	345.009		2450	0
	181.322		2460	0
	138.837		2470	0
	153.684		2480	0
	139.553		2490	0
	432.715		2500	0
	132.185
	210.249
	212.623
	195.302
	299.539
	146.51
	135.902
	128.291
	144.982
	278.677
	116.276
	141.891
	318.566
	131.519
	324.829
	199.628
	118.86
	140.646
	328.265
	282.933
	200.496
	199.938
	125.356
	395.201
	141.49
	144.454
	193.239
	144.044
	169.419
	116.731
	275.277
	131.284
	242.515
	434.142
	127.81
	420.513
	123.84
	209.69
	115.705
	322.994
	123.637
	278.413
	247.555
	243.94
	209.407
	233.14
	141.744
	338.613
	206.469
	131.595
	368.56
	269.524
	244.516
	240.47
	128.08
	274.489
	512.133
	209.753
	280.071
	354.49
	417.224
	123.449
	121.272
	120.961
	222.986
	605.902
	176.726
	141.66
	339.643
	139.815
	130.847
	360.59
	328.01
	273.052
	308.236
	137.269
	130.587
	328.482
	137.33
	119.234
	381.43
	380.707
	132.247
	236.497
	415.302
	159.718
	116.539
	207.451
	117.748
	215.588
	123.784
	357.176
	222.879
	117.286
	183.413
	332.071
	297.488
	181.771
	125.351
	276.667
	306.491
	294.287
	305.976
	115.564
	337.213
	390.968
	283.002
	378.937
	240.986
	215.71
	122.496
	218.308
	160.984
	242.903
	338.42
	117.58
	320.447
	276.562
	121.183
	205.844
	258.122
	133.362
	161.633
	242.07
	150.699
	377.203
	119.696
	147.117
	267.461
	137.864
	116.437
	159.735
	152.014
	371.758
	296.451
	155.484
	367.673
	124.885
	118.023
	173.796
	334.624
	250.787
	441.521
	259.404
	122.721
	120.845
	426.033
	129.614
	116.427
	135.931
	124.948
	256.995
	260.732
	347.183
	272.686
	117.172
	200.824
	197.683
	115.45
	128.659
	211.602
	375.93
	337.251
	190.978
	121.645
	138.814
	320.748
	152.214
	193.452
	120.073
	205.355
	125.12
	162.14
	231.365
	122.27
	275.677
	151.109
	122.444
	120.754
	148.901
	363.09
	132.849
	124.055
	164.226
	132.494
	121.223
	271.062
	149.703
	119.138
	171.826
	133.586
	351.061
	125.129
	126.853
	174.992
	201.415
	137.606
	339.879
	273.592
	239.785
	356.078
	194.638
	245.184
	280.017
	341.051
	144.503
	316.458
	233.078
	290.364
	206.082
	317.813
	298.918
	346.141
	310.73
	225.987
	262.303
	242.032
	223.243
	389.143
	251.003
	174.048
	130.476
	178.937
	220.134
	251.407
	137.115
	175.716
	221.006
	969.882
	204.168
	123.311
	216.44
	119.31
	182.399
	117.587
	155.814
	417.911
	248
	239.678
	262.07
	179.421
	322.088
	176.666
	196.39
	131.368
	349.116
	177.229
	220.825
	299.843
	340.947
	156.042
	791.496
	288.751
	506.374
	263.768
	258.534
	194.679
	118.735
	218.802
	345.998
	214.583
	166.539
	179.331
	378.857
	185.329
	243.765
	416.521
	181.063
	115.71
	251.767
	219.742
	232.824
	338.403
	215.513
	293.979
	177.835
	1112.39
	122.518
	197.273
	280.305
	222.916
	256.088
	116.206
	253.526
	179.891
	148.021
	272.941
	332.601
	273.874
	264.061
	288.126
	314.199
	552.335
	152.367
	221.882
	1240.51
	151.56
	185.514
	183.142
	264.936
	548.241
	192.181
	177.232
	124.231
	195.89
	237.718
	414.117
	271.057
	121.064
	330.051
	228.233
	148.065
	184.006
	120.853
	469.719
	261.436
	149.917
	241.88
	255.771
	122.599
	200.466
	271.219
	122.034
	118.169
	464.326
	250.285
	302.704
	227.558
	164.98
	212.864
	132.45
	250.39
	180.954
	213.978
	124.958
	122.563
	116.526
	275.954
	131.572
	255.549
	261.122
	135.16
	405.255
	418.955
	387.434
	307.367
	136.326
	407.247
	130.631
	134.418
	248.48
	341.324
	144.828
	478.983
	231.431
	333.157
	186.941
	312.82
	336.491
	342.948
	226.56
	274.336
	282.397
	362.489
	139.588
	161.103
	120.019
	150.988
	146.204
	180.367
	331.234
	781.589
	238.524
	291.403
	201.938
	154.227
	393.013
	258.277
	351.034
	227.452
	211.773
	227.013
	350.368
	202.259
	164.146
	147.675
	483.408
	128.185
	435.767
	406.879
	190.738
	465.608
	321.756
	322.493
	255.361
	236.58
	137.109
	308.599
	375.884
	150.88
	193.348
	565.965
	146.117
	477.184
	122.041
	335.697
	393.513
	954.034
	349.033
	338.711
	139.177
	128.671
	234.537
	370.9
	451.182
	252.111
	296.369
	359.631
	132.758
	381.455
	116.854
	338.617
	417.373
	431.582
	117.39
	217.748
	172.629
	143.903
	123.553
	134.937
	115.869
	305.274
	162.647
	417.05
	168.516
	130.409
	276.506
	137.027
	152.679
	141.97
	147.618
	241.164
	317.667
	239.193
	286.359
	224.533
	279.693
	201.433
	126.895
	318.712
	121.893
	153.382
	134.923
	127.464
	147.403
	139.318
	117.672
	435.952
	119.417
	178.25
	129.853
	218.256
	168.66
	319.846
	212.719
	140.56
	414.683
	164.711
	197.439
	391.173
	455.819
	270.821
	280.556
	223.902
	200.583
	267.513
	220.883
	232.413
	727.964
	671.345
	123.634
	324.153
	334.72
	116.98
	117.058
	569.191
	257.633
	361.996
	121.739
	187.417
	336.233
	124.689
	133.26
	119.225
	261.907
	257.37
	800.41
	308.88
	246.38
	266.8
	117.098
	195.66
	268.376
	206.657
	316.522
	121.087
	120.702
	285.153
	124.817
	285.719
	261.016
	230.875
	124.284
	162.746
	160.342
	281.607
	215.446
	166.342
	454.79
	376.587
	186.621
	213.642
	262.27
	362.418
	144.456
	290.64
	161.736
	116.358
	128.233
	136.368
	184.459
	139.097
	182.208
	147.795
	380.786
	391.037
	398.662
	228.598
	280.808
	217.25
	236.51
	286.156
	132.92
	146.643
	203.384
	121.688
	252.462
	198.249
	351.601
	124.037
	224.751
	135.254
	133.163
	401.271
	258.92
	140.72
	202.632
	215.496
	179.561
	150.074
	330.89
	265.145
	354.52
	285.563
	532.629
	267.209
	117.468
	132.979
	208.142
	127.007
	481.525
	153.692
	257.504
	189.89
	436.161
	210.408
	308.499
	232.678
	249.194
	200.923
	131.385
	140.702
	190.669
	181.416
	315.06
	235.349
	260.035
	131.82
	828.931
	218.824
	310.524
	264.881
	137.527
	831.988
	237.515
	374.2
	263.119
	130.5
	354.832
	117.416
	236.695
	290.031
	445.82
	415.182
	325.799
	207.324
	206.936
	457.697
	252.304
	456.088
	245.008
	188.859
	405.271
	165.962
	163.95
	233.406
	236.698
	141.215
	211.859
	245.554
	453.487
	115.665
	267.428
	134.619
	240.148
	186.342
	213.176
	168.938
	194.149
	133.856
	141.653
	200.897
	129.157
	338.346
	246.131
	117.923
	175.169
	208.69
	152.335
	303.703
	115.082
	127.004
	184.94
	160.119
	116.07
	127.588
	370.731
	414.479
	132.014
	129.173
	365.513
	270.429
	293.62
	134.387
	118.874
	148.393
	121.135
	222.976
	374.428
	295.3
	170.418
	167.65
	254.464
	119.929
	290.44
	303.998
	155.16
	178.621
	128.3
	116.489
	120.024
	410.838
	127.668
	290.724
	198.512
	121.794
	236.503
	274.265
	168.182
	124.122
	136.501
	118.05
	155.298
	349.822
	161.279
	174.146
	152.326
	251.082
	129.278
	288.403
	290.212
	129.931
	899.696
	284.933
	121.31
	626.791
	1631.54
	190.157
	234.982
	250.776
	273.181
	305.899
	291.897
	181.764
	441.365
	743.728
	267.692
	580.77
	343.053
	139.78
	243.456
	256.282
	180.798
	360.324
	450.123
	144.742
	269.624
	129.545
	151.621
	139.052
	120.248
	151.943
	337.201
	154.202
	131.744
	290.371
	221.716
	121.036
	158.962
	124.853
	303.789
	165.747
	247.124
	131.795
	132.232
	165.727
	259.795
	209.942
	207.442
	168.638
	321.47
	276.48
	219.659
	227.582
	228.698
	211.682
	253.355
	197.838
	228.056
	180.874
	119.794
	141.633
	292.032
	159.238
	121.334
	293.215
	206.17
	135.9
	235.8
	191.874
	184.033
	330.19
	226.503
	1322.48
	220.356
	436.757
	237.826
	252.784
	171.088
	283.305
	290.868
	275.84
	117.451
	116.303
	181.514
	150.584
	395.414
	137.268
	269.747
	274.227
	234.204
	303.332
	162.256
	240.055
	134.227
	216.811
	208.507
	312.368
	337.059
	245.123
	190.957
	268.603
	233.283
	226.929
	139.17
	146.094
	115.158
	612.576
	248.162
	279.386
	185.096
	143.929
	156.133
	229.369
	272.513
	130.929
	258.311
	278.894
	202.259
	310.043
	120.578
	178.923
	182.428
	184.289
	188.768
	273.51
	264.905
	238.464
	294.148
	253.327
	138.166
	341.02
	201.892
	169.492
	252.364
	242.252
	187.344
	258.354
	254.53
	226.302
	344.077
	244.065
	364.447
	427.254
	169.047
	219.498
	246.595
	164.611
	171.389
	278.011
	194.474
	140.008
	257.161
	364.888
	300.74
	190.811
	251.03
	267.538
	158.525
	224.061
	263.831
	159.505
	333.754
	261.003
	192.686
	152.921
	320.374
	149.908
	268.45
	367.876
	165.814
	253.655
	245.803
	219.173
	158.291
	191.342
	194.094
	557.993
	274.368
	205.166
	235.144
	214.69
	223.124
	309.288
	314.126
	144.89
	150.286
	192.464
	115.173
	218.698
	180.552
	128.161
	212.636
	123.819
	256.253
	258.704
	324.471
	249.545
	220.022
	192.169
	289.579
	275.464
	339.837
	192.103
	185.159
	387.518
	211.244
	122.345
	370.107
	243.918
	178.477
	152.536
	256.91
	146.559
	197.38
	157.293
	341.864
	235.706
	298.597
	588.791
	276.451
	215.901
	157.221
	152.921
	219.843
	378.575
	251.479
	127.258
	146.773
	132.578
	155.935
	207.284
	338.223
	199.044
	120.936
	126.241
	287.534
	178.359
	186.424
	176
	328.497
	239.327
	163.597
	186.66
	181.894
	310.862
	306.953
	127.784
	391.428
	165.942
	135.452
	119.043
	184.272
	194.521
	116.39
	293.838
	116.014
	243.077
	209.237
	128.991
	116.51
	281.596
	192.436
	165.682
	122.255
	297.999
	149.503
	167.702
	362.437
	179.795
	150.982
	133.265
	254.888
	155.424
	117.746
	130.212
	257.014
	127.749
	125.279
	245.501
	284.112
	128.016
	159.322
	308.545
	140.941
	130.253
	234.02
	134.067
	251.88
	275.117
	455.462
	193.645
	462.705
	163.39
	284.882
	312.299
	184.991
	322.852
	132.971
	117.846
	270.808
	336.513
	126.835
	118.216
	166.13
	232.33
	293.274
	222.461
	415.473
	173.734
	946.165
	190.678
	212.211
	246.296
	292.382
	238.903
	199.222
	266.099
	266.645
	214.764
	326.858
	153.42
	255.941
	231.282
	177.066
	299.771
	353.815
	334.423
	182.52
	132.256
	572.585
	201.585
	268.382
	122.049
	239.339
	288.976
	228.186
	271.446
	117.607
	445.892
	369.97
	309.427
	130.174
	168.825
	120.145
	260.832
	277.341
	232.037
	448.088
	250.385
	145.045
	181.025
	117.659
	188.018
	468.606
	271.029
	117.353
	749.362
	780.242
	284.543
	347.33
	172.655
	616.253
	142.867
	826.45
	135.107
	224.699
	214.232
	351.238
	271.416
	118.084
	115.846
	217.774
	191.588
	360.554
	248.298
	331.94
	229.316
	238.366
	142.557
	126.557
	119.672
	132.282
	397.833
	121.043
	190.85
	174.665
	116.245
	259.435
	117.692
	181.291
	278.728
	264.249
	387.713
	181.204
	234.859
	326.391
	234.22
	195.074
	231.878
	116.687
	1023.72
	239.533
	128.081
	318.387
	148.974
	123.164
	254.91
	445.137
	293.38
	314.332
	122.683
	307.763
	167.468
	115.836
	291.318
	343.609
	253.89
	246.407
	354.867
	124.917
	98.1436
	126.161
	96.4397
	97.1963
	303.679
	139.771
	280.078
	248.298
	105.738
	149.597
	102.942
	198.264
	101.274
	213.562
	99.525
	281.781
	161.901
	138.154
	148.795
	239.995
	368.544
	147.05
	179.677
	225.911
	450.199
	259.352
	270.284
	381.735
	344.516
	182.528
	229.71
	333.096
	246.142
	237.527
	249.743
	262.304
	291.843
	96.8426
	227.599
	326.355
	202.588
	317.864
	102.438
	99.6753
	212.069
	331.008
	181.679
	261.726
	298.231
	121.786
	95.4727
	156.947
	320.481
	189.582
	318.967
	242.404
	239.402
	413.923
	240.595
	101.465
	101.224
	116.226
	297.788
	96.5623
	641.279
	233.612
	236.233
	115.079
	115.55
	109.923
	787.665
	347.369
	741.114
	127.907
	161.588
	227.328
	245.502
	229.322
	99.3995
	129.353
	188.162
	351.019
	231.046
	134.28
	183.227
	100.687
	334.284
	333.816
	424.401
	246.39
	104.683
	128.273
	275.786
	476.759
	397.666
	419.918
	107.79
	313.63
	234.75
	196.964
	304.441
	351.7
	222.611
	375.206
	332.75
	97.9619
	99.9884
	233.232
	96.9673
	319.533
	313.216
	97.0609
	376.883
	212.913
	185.274
	320.666
	423.399
	395.924
	194.154
	288.012
	112.623
	318.781
	232.324
	216.188
	249.032
	119.221
	109.99
	274.003
	324.207
	255.3
	282.742
	355.705
	233.452
	172.33
	379.72
	98.5967
	231.348
	258.455
	291.083
	124.225
	356.436
	389.44
	97.7756
	98.1598
	97.3295
	318.719
	236.378
	115.843
	215.336
	179.057
	242.173
	186.464
	200.073
	458.138
	358.683
	105.236
	405.724
	101.736
	107.127
	108.59
	110.98
	114.427
	323.59
	297.971
	104.2
	1290.11
	101.663
	196.915
	377.9
	101.464
	475.631
	241.637
	510.393
	237.502
	147.088
	95.484
	120.339
	96.1901
	137.074
	324.229
	101.781
	101.839
	280.734
	116.463
	114.408
	118.881
	329.157
	176.348
	103.371
	389.336
	312.185
	118.611
	106.584
	244.517
	107.862
	343.909
	315.863
	108.573
	341.049
	231.63
	263.13
	134.456
	561.287
	121.824
	251.651
	183.923
	224.929
	247.172
	123.399
	405.006
	230.28
	97.7795
	124.818
	241.342
	135.882
	105.44
	310.004
	153.711
	325.018
	114.985
	325.662
	217.324
	373.367
	98.8113
	362.924
	388.774
	257.472
	192.737
	119.506
	116.048
	113.934
	97.4482
	303.813
	99.57
	102.904
	110.309
	143.393
	382.62
	187.485
	104.966
	206.872
	159.074
	100.664
	199.925
	95.6391
	231.965
	106.016
	96.8133
	297.281
	111.151
	118.897
	237.88
	98.4945
	301.573
	99.3725
	338.281
	229.473
	294.212
	117.834
	100.651
	124.787
	454.909
	101.347
	98.8531
	162.434
	112.502
	223.506
	97.3714
	244.358
	295.228
	114.353
	320.185
	261.556
	110.206
	223.704
	122.537
	381.366
	546.028
	97.5419
	218.666
	99.2673
	157.742
	153.306
	105.44
	270.666
	289.301
	223.159
	248.83
	384.047
	103.473
	140.722
	110.716
	103.84
	105.202
	102.099
	102.621
	204.793
	224.327
	114.069
	129.67
	100.771
	108.911
	336.855
	286.188
	107.619
	195.735
	104.803
	118.191
	101.908
	123.535
	275.556
	100.625
	95.6266
	346.065
	107.695
	101.084
	107.051
	124.179
	356.177
	102.662
	102.922
	313.411
	108.464
	100.405
	95.2777
	150.795
	101.669
	114.976
	120.584
	145.705
	99.9077
	99.9744
	146.63
	128.361
	228.574
	221.356
	202.03
	213.603
	97.814
	354.894
	112.764
	281.938
	150.801
	338.398
	236.949
	208.738
	334.017
	203.615
	107.525
	415.933
	311.808
	184.926
	326.925
	102.446
	105.016
	104.308
	211.199
	303.162
	136.051
	404.944
	300.776
	140.625
	321.747
	200.442
	393.845
	136.073
	120.959
	237.15
	101.896
	116.799
	380.842
	111.748
	101.531
	108.971
	192.547
	97.0699
	100.347
	103.617
	129.365
	111.757
	106.504
	129.247
	128.53
	132.569
	99.3764
	661.458
	127.938
	100.157
	257.782
	104.363
	116.118
	183.623
	306.84
	103.472
	109.001
	96.8443
	95.5078
	139.21
	128.165
	213.213
	100.087
	179.37
	400.127
	118.168
	137.327
	355.119
	112.292
	524.461
	330.968
	219.998
	112.775
	96.9734
	1106.94
	293.665
	612.887
	868.91
	117.912
	260.861
	129.583
	95.3749
	98.6089
	215.465
	104.195
	191.999
	95.416
	139.588
	100.308
	131.863
	133.235
	143.293
	97.0148
	97.0846
	200.141
	102.529
	353.293
	154.803
	95.9214
	334.689
	192.737
	317.944
	115.316
	113.228
	127.968
	106.343
	102.58
	109.784
	102.003
	111.386
	130.343
	105.93
	95.6939
	104.355
	113.753
	243.873
	210.394
	204.598
	209.536
	102.701
	176.68
	241.009
	125.892
	219.654
	247.176
	178.945
	142.455
	293.781
	278.425
	101.115
	95.6588
	111.359
	96.7181
	258.875
	104.092
	164.259
	160.236
	103.447
	106.103
	319.814
	262.55
	105.608
	167.229
	116.083
	109.57
	103.944
	294.21
	122.578
	147.092
	265.715
	485.7
	145.335
	100.204
	103.337
	138.19
	131.28
	98.8995
	646.344
	97.3433
	159.451
	98.1554
	107.373
	224.095
	167.189
	101.676
	256.028
	173.897
	156.549
	327.867
	299.166
	113.107
	106.838
	222.343
	445.234
	109.277
	120.695
	244.899
	105.216
	95.8684
	103.378
	880.345
	98.964
	279.057
	327.65
	104.516
	288.22
	104.726
	162.06
	110.141
	106.141
	115.646
	101.996
	133.504
	234.429
	99.0413
	95.2215
	99.0941
	260.446
	96.4145
	313.757
	445.221
	122.904
	181.891
	317.654
	305.842
	120.545
	122.636
	134.87
	203.159
	236.261
	188.026
	317.256
	117.912
	104.437
	228.628
	302.181
	99.9178
	124.366
	107.921
	235.825
	286.021
	104.177
	436.562
	298.325
	102.86
	297.004
	221.389
	359.24
	168.152
	100.245
	367.919
	114.118
	124.218
	96.8625
	277.28
	113.704
	197.8
	102.081
	201.09
	104.359
	132.547
	260.173
	275.992
	121.321
	170.054
	107.73
	108.154
	210.748
	97.9141
	96.0655
	144.71
	116.489
	251.099
	107.608
	355.737
	96.7611
	95.3352
	103.992
	237.629
	128.717
	454.691
	112.218
	100.065
	105.473
	101.626
	134.336
	301.483
	107.518
	143.582
	150.333
	233.475
	222.646
	139.911
	98.2844
	95.6987
	111.162
	107.922
	139.004
	103.313
	115.976
	96.9417
	222.813
	237.44
	105.227
	119.942
	101.791
	320.256
	98.3729
	135.288
	186.68
	98.1065
	266.415
	170.76
	127.658
	102.442
	434.492
	102.88
	109.005
	104.36
[truncated: 1,893 more rows]

## Sheet: Figure 2 Supplement 3b
			Method 1	Method2
			hERG1a	hERG1a
			148	65
			131	57
			68	24
			80	22
			105	171
			133	34
			45	120
			81	112
			68	42
			39	85
			91	102
			20	81
			19	142
			19	98
			52	27
			37	120
			105	96
			69	40
			38	30
			20	29
			123	53
			116	109
			99	71
			148	18
			54	90
			96	43
			35	36
			28	70
			53	49
			99	61
			8	33
			28	50
			57	28
			95	164
			62	48
			54	134
			185	49
			123	27
			70	97
			70	59
			74	192
		Mean	74.2683	72.6341
		SD	41.8468	44.6412
		SEM	6.4571	6.88829
