# Supplementary material for: A microtranslatome coordinately regulates sodium and potassium currents in the human heart
Source: eLife. 2019 Oct 31;8:e52654. doi: 10.7554/eLife.52654 (PMC6867827; doi:10.7554/eLife.52654)
Supplement: Figure 2—source data 1. [file elife-52654-fig2-data1.xlsx]

## Sheet: Figure 2b
	Intensities		Total # particle		frequence
	27293		2611	0	0
	28638.4			20000	0
	29840.2			40000	18
	31238.4			60000	89
	31498			80000	100
	31878.9			100000	112
	32428.1			120000	114
	34408			140000	108
	35337.2			160000	115
	35544			180000	107
	37744.6			200000	95
	38039.7			220000	99
	38508.3			240000	84
	38678.8			260000	77
	39268			280000	85
	39674			300000	76
	39674			320000	76
	39762.3			340000	74
	41301.7			360000	78
	41464			380000	69
	42903.7			400000	64
	43318.2			420000	55
	43465.5			440000	42
	44746.7			460000	46
	45329.5			480000	49
	45508.3			500000	48
	45817.3			520000	39
	45874			540000	49
	46632.6			560000	45
	46801.5			580000	30
	46813.3			600000	20
	46959.8			620000	23
	47147.7			640000	31
	47493.5			660000	26
	47852.2			680000	23
	48244.2			700000	23
	48270.7			720000	29
	48790			740000	16
	49044.7			760000	16
	49146			780000	19
	49176.7			800000	19
	49950.5			820000	16
	50142.8			840000	12
	50245			860000	11
	50268.5			880000	11
	50340.6			900000	12
	50744.1			920000	7
	50848.6			940000	7
	50932			960000	8
	51420			980000	9
	51858.4			1000000	10
	52095.3			1020000	7
	52126			1040000	4
	52915			1060000	3
	52984.3			1080000	5
	53065			1100000	6
	53556.7			1120000	0
	53567.4			1140000	6
	53639			1160000	2
	53639.2			1180000	3
	53810.8			1200000	3
	53925.5			1220000	3
	53992.8			1240000	1
	54216			1260000	3
	54240.2			1280000	1
	54307.3			1300000	5
	54402.5			1320000	4
	54574.5			1340000	4
	54976			1360000	3
	54984.3			1380000	2
	55261			1400000	3
	55451.8			1420000	1
	55750.5			1440000	0
	55770			1460000	1
	55770			1480000	1
	55831.3			1500000	2
	56215.2			1520000	7
	56258.5			1540000	2
	56279.6			1560000	1
	56521.4			1580000	2
	56593			1600000	2
	57157.7			1620000	3
	57250.9			1640000	1
	57275.8			1660000	3
	57316.3			1680000	1
	57327.6			1700000	3
	57373.3			1720000	0
	57408			1740000	2
	57443.3			1760000	4
	57595			1780000	2
	57595			1800000	0
	57772.1			1820000	1
	58131.5			1840000	1
	58200.4			1860000	2
	58200.4			1880000	1
	58471.5			1900000	2
	58551			1920000	3
	58793.5			1940000	2
	59427.7			1960000	2
	59460.7			1980000	1
	59500			2000000	0
	59599.3			2020000	1
	59599.3			2040000	0
	59618.8			2060000	0
	59764.1			2080000	0
	59829			2100000	2
	59936.9			2120000	1
	60057.3			2140000	1
	60361.6			2160000	3
	60646.3			2180000	0
	60749.5			2200000	2
	60769.2			2220000	1
	60962.6			2240000	1
	60985			2260000	4
	61058.6			2280000	0
	61275			2300000	0
	61691			2320000	0
	61806			2340000	1
	61856			2360000	0
	61904.8			2380000	0
	61915.1			2400000	0
	62182.1			2420000	0
	62395.5			2440000	0
	62693			2460000	1
	62742.8			2480000	1
	62776.5			2500000	1
	62789			2520000	1
	63029.5			2540000	2
	63224.6			2560000	2
	63352.2			2580000	1
	64258			2600000	1
	64328.2			2620000	0
	64445.6			2640000	0
	64612			2660000	0
	64904			2680000	0
	65247.2			2700000	0
	65584.8			2720000	0
	65728.1			2740000	3
	66049.2			2760000	2
	66158.3			2780000	0
	66284.3			2800000	1
	66359.1			2820000	0
	66404			2840000	0
	66417.3			2860000	0
	66471.4			2880000	0
	66551.3			2900000	0
	66635.8			2920000	0
	66641.8			2940000	0
	66862			2960000	1
	66964.5			2980000	1
	67028.1			3000000	0
	67057.5			3020000	0
	67253			3040000	1
	67297.9			3060000	0
	67305			3080000	0
	67334			3100000	0
	67379.4			3120000	0
	67400.1			3140000	0
	67489.3			3160000	0
	67514.8			3180000	0
	67560			3200000	0
	67560			3220000	0
	67628.5			3240000	0
	68066			3260000	0
	68076.2			3280000	0
	68134.3			3300000	2
	68232.4			3320000	0
	68260.9			3340000	0
	68274			3360000	0
	68320.2			3380000	0
	68397.5			3400000	0
	68499.4			3420000	0
	68893.4			3440000	0
	68943.4			3460000	0
	68944.9			3480000	0
	69280.6			3500000	0
	69311.5			3520000	0
	69526			3540000	1
	69580.4			3560000	0
	69626			3580000	0
	69663			3600000	0
	70475			3620000	0
	70687.4			3640000	1
	70719.9			3660000	0
	70860			3680000	0
	71018			3700000	1
	71440			3720000	0
	71453.1			3740000	0
	71652.4			3760000	0
	71675.6			3780000	0
	71696.6			3800000	0
	71717.9			3820000	0
	71722			3840000	0
	72058.4			3860000	0
	72133.7			3880000	0
	72715.9			3900000	0
	73039.3			3920000	0
	73149.8			3940000	0
	73176.7			3960000	0
	73370.9			3980000	0
	73620			4000000	0
	73702			4020000	0
	73996			4040000	0
	74024			4060000	0
	74024			4080000	0
	74248.9			4100000	0
	74430.8			4120000	0
	74476.9			4140000	0
	74534			4160000	0
	74538			4180000	0
	74740.9			4200000	0
	74831.8			4220000	1
	74910.3			4240000	1
	74925.3			4260000	0
	75167.6			4280000	1
	75173			4300000	0
	75288.6			4320000	0
	75349.6			4340000	0
	75371.6			4360000	0
	75556.2			4380000	0
	75660.2			4400000	0
	75952			4420000	0
	75954			4440000	0
	76227.1			4460000	0
	76327			4480000	0
	76526.6			4500000	0
	76738			4520000	0
	76741			4540000	0
	76831.7			4560000	0
	76971.8			4580000	0
	77130			4600000	0
	77325.4			4620000	0
	77430.4			4640000	0
	77823			4660000	0
	77823			4680000	0
	77897.7			4700000	0
	78076.9			4720000	0
	78386			4740000	0
	78585			4760000	0
	78619			4780000	2
	78847			4800000	0
	78847			4820000	0
	78855			4840000	0
	78925.5			4860000	0
	78967			4880000	0
	79014.6			4900000	0
	79439.1			4920000	1
	79439.1			4940000	0
	79628.2			4960000	0
	79652.1			4980000	0
	79759.1			5000000	0
	79850.5			5020000	0
	79939.7			5040000	0
	79994.6			5060000	0
	80408.3			5080000	0
	80778.8			5100000	0
	80803.2			5120000	0
	81129			5140000	0
	81288.3			5160000	0
	81288.3			5180000	0
	81408.5			5200000	0
	81421.6			5220000	0
	82453.5			5240000	0
	82504.2			5260000	0
	82630.5			5280000	0
	82630.5			5300000	0
	83306.5			5320000	0
	83538.3			5340000	0
	83690.1			5360000	0
	84150			5380000	0
	84161.4			5400000	0
	84321.3			5420000	0
	84519.2			5440000	0
	84600.1			5460000	0
	84673			5480000	0
	84830.4			5500000	0
	84880.5			5520000	0
	84909.4			5540000	1
	84928.5			5560000	0
	84972			5580000	0
	85300.5			5600000	0
	86148			5620000	0
	86295			5640000	0
	86435			5660000	0
	86572			5680000	0
	86949.2			5700000	0
	87086			5720000	0
	87207.1			5740000	0
	87323.3			5760000	0
	87393			5780000	0
	87714			5800000	0
	87807.5			5820000	0
	87833.1			5840000	0
	87833.1			5860000	0
	88032.6			5880000	0
	88723.3			5900000	0
	88724			5920000	0
	88804.1			5940000	0
	89145.1			5960000	0
	89236			5980000	0
	89303.1			6000000	0
	89532			6020000	0
	89895.5			6040000	1
	90153.3			6060000	0
	90355.8			6080000	0
	90822.8			6100000	1
	90975.7			6120000	0
	91520.2			6140000	0
	91532.5			6160000	0
	91657.4			6180000	0
	92017.7			6200000	0
	92231.4			6220000	0
	92252.8			6240000	0
	92274.7			6260000	0
	92311.4			6280000	0
	92335			6300000	0
	92531			6320000	0
	92531			6340000	0
	92553.5			6360000	0
	92658			6380000	0
	92687.7			6400000	0
	92722.9			6420000	0
	92748.1			6440000	0
	93112.6			6460000	0
	93121			6480000	0
	93163.8			6500000	0
	93507.2			6520000	0
	93796.3			6540000	0
	93862.3			6560000	0
	94142			6580000	0
	94273.8			6600000	0
	94301			6620000	0
	94346.9			6640000	0
	94458			6660000	0
	94534			6680000	0
	94611.4
	94948.4
	95162.4
	95194
	95194
	95438.8
	95539.5
	95596.7
	95888.5
	96039.9
	96233.5
	96307.8
	96318.4
	96749.2
	97048.2
	97048.2
	97089.5
	97510.1
	97939.2
	97980
	98163.2
	98217
	98257.2
	98364
	98744.5
	98807.6
	99475
	99628.6
	99639.4
	99801.8
	99829.9
	100155
	100314
	100527
	100742
	101023
	101355
	101368
	101800
	101837
	101925
	101947
	102187
	102216
	102617
	102925
	102929
	103107
	103546
	103608
	103806
	103856
	104001
	104237
	104650
	104667
	104735
	104841
	105180
	105266
	105464
	105525
	105675
	105902
	105966
	106050
	106051
	106142
	106481
	106547
	106779
	106848
	106954
	106954
	107195
	107270
	107735
	108348
	108493
	109135
	109135
	109159
	109248
	109263
	109263
	109317
	109564
	109588
	109886
	109888
	110178
	110330
	110753
	110793
	110843
	110880
	110996
	111655
	111681
	112519
	112561
	112561
	113326
	113338
	113697
	113820
	113860
	113894
	113914
	114374
	114673
	114868
	115268
	115350
	115358
	115547
	115636
	115699
	115930
	116094
	116184
	116194
	116338
	116497
	116552
	116840
	117197
	117488
	117493
	117504
	117584
	117627
	118323
	118340
	118641
	118884
	118925
	119045
	119251
	119469
	119470
	119576
	119871
	119910
	119981
	120024
	120165
	120243
	120329
	120402
	120475
	120492
	120621
	120786
	120805
	120816
	120966
	120974
	121064
	121178
	121187
	121304
	121637
	121679
	121813
	122297
	122413
	122694
	122711
	122715
	123267
	123475
	124187
	124855
	124855
	125098
	125134
	125153
	125324
	125743
	125792
	126143
	126166
	126358
	126462
	126633
	126633
	126673
	126902
	126927
	127080
	127093
	127267
	127517
	127530
	127664
	128043
	128868
	128885
	128915
	128969
	129147
	129196
	129196
	129421
	129480
	129721
	129814
	129831
	129853
	129943
	130357
	130374
	130374
	130440
	130443
	130595
	130627
	131513
	131537
	131932
	132138
	133692
	134108
	134492
	135014
	135070
	135083
	135125
	135170
	135883
	135922
	136058
	136158
	136339
	136507
	136812
	136908
	137092
	137338
	137438
	137926
	138030
	138223
	138355
	138518
	138611
	139177
	139181
	139763
	139838
	139891
	139944
	140036
	140055
	140063
	140281
	140438
	140596
	140730
	141036
	141250
	141312
	141544
	141824
	141918
	142221
	142221
	142257
	142305
	142523
	142543
	142610
	142622
	143107
	143139
	143413
	143687
	144157
	144182
	144722
	144775
	144838
	144863
	145170
	145233
	145263
	145312
	145769
	145769
	145950
	146094
	146401
	146532
	146565
	146651
	146701
	147203
	147646
	147712
	148074
	148426
	148441
	148467
	148663
	148810
	148831
	149003
	149184
	149407
	149486
	149540
	149703
	150055
	150187
	150359
	150395
	150789
	150791
	150899
	150939
	151388
	151426
	151529
	152098
	152174
	152206
	152562
	152747
	152807
	152890
	153255
	153369
	153500
	153667
	153714
	153814
	154055
	154263
	154435
	154936
	154968
	155151
	155653
	155754
	155762
	155931
	156309
	156405
	156676
	156676
	156953
	157177
	157430
	157503
	157564
	157717
	158245
	158501
	158574
	158636
	158701
	158701
	158881
	158997
	159042
	159490
	159857
	160019
	160019
	160069
	160139
	160684
	160684
	160958
	160962
	161236
	161468
	161685
	161783
	161786
	161822
	161994
	162054
	162185
	162429
	162526
	162552
	162560
	162567
	162628
	162755
	162980
	163008
	163122
	163473
	163506
	163750
	163905
	163948
	164030
	164032
	164523
	164539
	165764
	165803
	166036
	166119
	166373
	166461
	166841
	166867
	166926
	168088
	168221
	168324
	168790
	169069
	169214
	169232
	169389
	169490
	169522
	170114
	170205
	170263
	170729
	170871
	171057
	171411
	171485
	171487
	171906
	172090
	172226
	173023
	173175
	173180
	173271
	173393
	173436
	173649
	173703
	173882
	174121
	174855
	175217
	175617
	175767
	175813
	175814
	175819
	175903
	175928
	176142
	176221
	176539
	176831
	177078
	177500
	178052
	178350
	178468
	178567
	178721
	178731
	179119
	179138
	179189
	179336
	179391
	179779
	179869
	179994
	179994
	180047
	180048
	180447
	181052
	181269
	181625
	181639
	181893
	181898
	182044
	182589
	182762
	183087
	183260
	183388
	183418
	183459
	183466
	183506
	183755
	183945
	184080
	184167
	184328
	184390
	184546
	184944
	185321
	185323
	185405
	185548
	186046
	186149
	186172
	186319
	186548
	187272
	187364
	187876
	187955
	188337
	188444
	188475
	188556
	188881
	188992
	189335
	189673
	189865
	189907
	190013
	190290
	190433
	190549
	190619
	190725
	190795
	190908
	190946
	191158
	191166
	191218
	191302
	192274
	192449
	192994
	193581
	194026
	194088
	194102
	194103
	194170
	194499
	194637
	194698
	195187
	195265
	195300
	195579
	195807
	195900
	195972
	196279
	196383
	196520
	196835
	197109
	197586
	197781
	198725
	199184
	199360
	199589
	199593
	199970
	200016
	200145
	200145
	200514
	200542
	200984
	201393
	201493
	201553
	201604
	201774
	202098
	202190
	202246
	202357
	202433
	202870
	203088
	203238
	203672
	203890
	204179
	204494
	205546
	205653
	205945
	206027
	206138
	206150
	206735
	206813
	206953
	207023
	207034
	207191
	207191
	207290
	207391
	207709
	208045
	208053
	208267
	208317
	208388
	208738
	208751
	208783
	209010
	209311
	209627
	209692
	209981
	210435
	210602
	210772
	210900
	211074
	211076
	211131
	212037
	212175
	212374
	212803
	212947
	213376
	213421
	213435
	213849
	213878
	214175
	214252
	214596
	215110
	215135
	215335
	215376
	215489
	215566
	215870
	215941
	216204
	216289
	216719
	217136
	217211
	217459
	217574
	217594
	217708
	218362
	218390
	218425
	218430
	218687
	218770
	219005
	219039
	219523
	219846
	220273
	220444
	220559
	220660
	220696
	220762
	221192
	221289
	221332
	221506
	221694
	221769
	221997
	222279
	222440
	222510
	222517
	222634
	223137
	223216
	223222
	223256
	223643
	223793
	223934
	223976
	224033
	224077
	224078
	224435
	224526
	225204
	225520
	225630
	225732
	225856
	225938
	226001
	226050
	226262
	226275
	227101
	227281
	228388
	228711
	228754
	229047
	229318
	229318
	229409
	230033
	230073
	230412
	230813
	230890
	230927
	231201
	231213
	231866
	232042
	232328
	233083
	233507
	234402
	234405
	234687
	235254
	236276
	236650
	236751
	236790
	236947
	237374
	237511
	237554
	237715
	238076
	239045
	239129
	239267
	239301
	239410
	239747
	239854
	240079
	240079
	240728
	240765
	242456
	242667
	242692
	242850
	242927
	243149
	243366
	243506
	243753
	243993
	244297
	244518
	245064
	245678
	245793
	245970
	246153
	246870
	247057
	247086
	247306
	247732
	247732
	248196
	248263
	248453
	248833
	248896
	248926
	248939
	249103
	249150
	249363
	249435
	249565
	249588
	249758
	249886
	249906
	250367
	250529
	251605
	251634
	251648
	251657
	252053
	252361
	252679
	252680
	252680
	252862
	253389
	253654
	253851
	253871
	254097
	254791
	255000
	255234
	255247
	255779
	255821
	256482
	256978
	257025
	257335
	257337
	257571
	258327
	259419
	259740
	259887
	259981
	260068
	260170
	260266
	260509
	260717
	261068
	261104
	261320
	261436
	261552
	261716
	261716
	261992
	262134
	262134
	262148
	262168
	262986
	263192
	263341
	263881
	264165
	264409
	264501
	264516
	264703
	265110
	265424
	265661
	265713
	265845
	266009
	266103
	266113
	266211
	266338
	267240
	267314
	267473
	267689
	267734
	268337
	268401
	268578
	268619
	269845
	270935
	270998
	271305
	271357
	271689
	272121
	272326
	272729
	272753
	272892
	273164
	273279
	273371
	273599
	273814
	274025
	274616
	274720
	275086
	275138
	275146
	275382
	275413
	275870
	275970
	276024
	276420
	276752
	277524
	277785
	278289
	278399
	278984
	279288
	279435
	279436
	279723
	279739
	279866
	280040
	280040
	280461
	280907
	281292
	281567
	281912
	282092
	282848
	283169
	283542
	283622
	283674
	283689
	284633
	284643
	285094
	285427
	285461
	285584
	285584
	285584
	285831
	286032
	286307
	286603
	286790
	287262
	287310
	287953
	288084
	288139
	288149
	288212
	288420
	288466
	288530
	288596
	288610
	288809
	288811
	289370
	289451
	289587
	290424
	290746
	291240
	291751
	291941
	292418
	292479
	292700
	292845
	293062
	293404
	293851
	294573
	294913
	294929
	295551
	296486
	296614
	297011
	297070
	297108
	297537
	297625
	297875
	298101
	298284
	298586
	298684
	298960
	298984
	299027
	299468
	300049
	300289
	301144
	301380
	301458
	302992
	303007
	303154
	303290
	303339
	303349
	303405
	303714
	303715
	304006
	304123
	304638
	304951
	305228
	305485
	305485
	305742
	306475
	307054
	307209
	307789
	307929
	308482
	309072
	309144
	310325
	310337
	310813
	310962
	311376
	311723
	311795
	312094
	312266
	312598
	313204
	313204
	313227
	313392
	313400
	313434
	313481
	313719
	313975
	313975
	313996
	314038
	314108
	314355
	314360
	314513
	314701
	314979
	315341
	315683
	315755
	315846
	315883
	315885
	316038
	316466
	316587
	316943
	317545
	318164
	318164
	318921
	318985
	319118
	319233
	319596
	320144
	320195
	320262
	320452
	321460
	321730
	321746
	321874
	322140
	322204
	323183
	323282
	323460
	323902
	324592
	324852
	325189
	325657
	325783
	326080
	326234
	326366
	326378
	326699
	326896
	326912
	326958
	327186
	327903
	327957
	327969
	329117
	329299
	329483
	329698
	329698
	330457
	330462
	330469
	330710
	330741
	331412
	331669
	331669
	331911
	332139
	332224
	332258
	332274
	332383
	332841
	332985
	333248
	333582
	333872
	334408
	334500
	334531
	335024
	335024
	335345
	335601
	335709
	336059
	336318
	336415
	336424
	337412
	337850
	338249
	339175
	339215
	339532
	339857
	340169
	340271
	340422
	340540
	340749
	340784
	340784
	340926
	341190
	341482
	341970
	342091
	342808
	342905
	343082
	343116
	343281
	344042
	344205
	344303
	344914
	345171
	345421
	345480
	345634
	345879
	345905
	345949
	346002
	346034
	346217
	346756
	347011
	347011
	347108
	347518
	347674
	347845
	348539
	349014
	350131
	350420
	351262
	351368
	352997
	353002
	353461
	353597
	353878
	354460
	354861
	355229
	355530
	355747
	355777
	356023
	356417
	356573
	356774
	356971
	357177
	357608
	357698
	357748
	357762
	357933
	357968
	358473
	358556
	358628
	358715
	358760
	358926
	359540
	359551
	359587
	359962
	359962
	360569
	360578
	360703
	361458
	361474
	361499
	361790
	362180
	362315
	362740
	363408
	363472
	363606
	363780
	363886
	363890
	364314
	364557
	364602
	365044
	365895
	365996
	366154
	366414
	366457
	366510
	367170
	367437
	367612
	367884
	368094
	368164
	368325
	368357
	368648
	368993
	368999
	369743
	369948
	370156
	370491
	370788
	370894
	371401
	372034
	372300
	372809
	372979
	373610
	373833
	374827
	375071
	375076
	375256
	375371
	375513
	376098
	376148
	376583
	376782
	377345
	377887
	378011
	378028
	378051
	378831
	378854
	378954
	379773
	380349
	380585
	380964
	381176
	381727
	381727
	381870
	382071
	382451
	382535
	382754
	382859
	382905
	382968
	382992
	383192
	383580
	384396
	384827
	385282
	385389
	385389
	385687
	385842
	386236
	386236
	386633
	386883
	386931
	387543
	387691
	387777
	387883
	388219
	388648
	388697
	388896
	388896
	389416
	389416
	389915
	389957
	390400
	390811
	390976
	391038
	391331
	391411
	391515
	391994
	392784
	393570
	394014
	394389
	395230
	395520
	395644
	395790
	396985
	397048
	398236
	398394
	398749
	399163
	400401
	400606
	400914
	401027
	401193
	401804
	401821
	401952
	402410
	402532
	402824
	403082
	403193
	403193
	403207
	403851
	404449
	405016
	405026
	406138
	406897
	407070
	407896
	408075
	409868
	409896
	410135
	410295
	410434
	410779
	410813
	411580
	412166
	412175
	412942
	413508
	413512
	413843
	413860
	414130
	414130
	415253
	415300
	416809
	417157
	417523
	417526
	417655
	417867
	417927
	418443
	419153
	419258
	419534
	419907
	420283
	421182
	421341
	421729
	421850
	421889
	424727
	424845
	425207
	425518
	425682
	425832
	425832
	426544
	427642
	429192
	429461
	429897
	431444
	431857
	432300
	432341
	432368
	433346
	433358
	433358
	433525
	434393
	434648
	435118
	435852
	436098
	436164
	436182
	436201
	436998
	437301
	437658
	438924
	439086
	439120
	439575
	441002
	441223
	441657
	441825
	442261
	442261
	442666
	443026
	443173
	443844
	443866
	443941
	444229
	444678
	445148
	445542
	445868
	446408
	446529
	447473
	448030
	448509
	448655
	448901
	449299
	449718
	449808
	449808
	450074
	450216
	451165
	451631
	452635
	452969
	453331
	453452
	453513
	454116
	454260
	454625
	456552
	457104
	457130
	457181
	459400
	459749
	460433
	460440
	460504
	460533
	460703
	460719
	460766
	461647
	461647
	462047
	462421
	462421
	462589
	463411
	464369
	464670
	464891
	464975
	465341
	465412
	465451
	465967
	466431
	466982
	467357
	468072
	468674
	468702
	468717
	470252
	471481
	472876
	473289
	473977
	474061
	474061
	474598
	476519
	476830
	477104
	477169
	477309
	477381
	478555
	478945
	479138
	479326
	479395
	479621
	480223
	481033
	481416
	482304
	482504
	482723
	482766
	483276
	483460
	485146
	485433
	485899
	486119
	486158
	486757
	486932
	487110
	487474
	488253
	488552
	488824
	489166
	489166
	489617
	489999
	490795
	490795
	490980
	491734
	491982
	492014
	492024
	492426
	492480
	492781
	493965
	494088
	495910
	495960
	495994
	496331
	496514
	496514
	496681
	497577
	498657
	498780
	498836
	500345
	500345
	500955
	502124
	502170
	502466
	502736
	503207
	503207
	503721
	503744
	503951
	504040
	504174
	505223
	505394
	506709
	506878
	506878
	507105
	507155
	507470
	507940
	507955
	507998
	509152
	509463
	509588
	510060
	511183
	511680
	512885
	513510
	513755
	515054
	515288
	516285
	517056
	518273
	520282
	520516
	521041
	521041
	521433
	522247
	522360
	522486
	523316
	523353
	523490
	523682
	523734
	525198
	525349
	525535
	525595
	526053
	527241
	528384
	528612
	529270
	529617
	529725
	530285
	531800
	531895
	532031
	532054
	533605
	533707
	533786
	534079
[truncated: 612 more rows]
