# Supplementary material for: A microtranslatome coordinately regulates sodium and potassium currents in the human heart
Source: eLife. 2019 Oct 31;8:e52654. doi: 10.7554/eLife.52654 (PMC6867827; doi:10.7554/eLife.52654)
Supplement: Figure 2—source data 2. [file elife-52654-fig2-data2.xlsx]

## Sheet: Figure 2c
	SCN5A			hERG			hERG			SCN5A		hERG		GAPDH
	# particles per cluster	# observations		# particles per cluster	# observations		# particles per cluster	# observations		Cluster size	%	Cluster size	%	Cluster size	%
	1	721		1	753		1	1703		1	25.8	1	29	1	48.6
	2	441		2	501		2	905		2	15.2	2	19.3	2	25.8
	3	400		3	420		3	398		3	14.3	3	16.2	3	11.3
	4	312		4	268		4	225		4	11.2	4	10.3	4	6.4
	5	208		5	190		5	114		5	7.5	5	7.3	5	3.3
	6	157		6	141		6	59		6 and more	26	6 and more	17.9	6 and more	4.6
	7	108		7	92		7	38
	8	87		8	52		8	23
	9	55		9	37		9	14
	10	51		10	21		10	5
	11	51		11	12		11	6
	12	39		12	20		12	4
	13	23		13	11		13	3
	14	27		14	11		14	3
	15	13		15	10		15	2
	16	20		16	10		16	0
	17	13		17	11		17	0
	18	13		18	2		18	0
	19	11		19	8		19	1
	20	11		20	6		20	0
	21	14		21	2		21	0
	22	6		22	5		22	1
	23	4		23	4		23	2
	24	5		24	5		24	1
	25	2		25	1		25	0
		Total			Total			Total
		2792			2593			3507
