# Supplementary material for: A microtranslatome coordinately regulates sodium and potassium currents in the human heart
Source: eLife. 2019 Oct 31;8:e52654. doi: 10.7554/eLife.52654 (PMC6867827; doi:10.7554/eLife.52654)
Supplement: Figure 2—source data 3. [file elife-52654-fig2-data3.xlsx]

## Sheet: Figure 2d
		SCN5A mRNA				hERG1a mRNA				GAPDH mRNA
		Dist from N (pix)	Dist from N (um)	# SCN5A mRNA		Dist from N (pix)	Dist from N (um)	# hERG mRNA		Dist from N (pix)	Dist from N (um)	# GAPDH mRNA
		405.652	1	0		422.204	1	0		521.434	1	0
		392.295	2	29		405.184	2	13		493.696	2	4
		374.362	3	65		391.679	3	43		487.03	3	14
		366.802	4	93		373.664	4	88		484.213	4	21
		363.5	5	187		362.118	5	157		478.304	5	49
		356.443	6	253		350.21	6	206		475.565	6	72
		351.516	7	234		349.425	7	196		473.96	7	115
		351.278	8	221		347.615	8	185		464.604	8	137
		344.651	9	196		344.44	9	179		461.452	9	169
		343.719	10	152		343.044	10	152		456.238	10	156
		339.334	11	124		342.644	11	123		455.174	11	179
		335.669	12	112		342.403	12	141		455.033	12	158
		333.93	13	103		339.756	13	109		454.808	13	161
		333.143	14	91		338.756	14	89		450.109	14	164
		333.074	15	78		328.733	15	99		447.088	15	173
		332.327	16	73		328.234	16	99		445.289	16	162
		332.119	17	86		327.973	17	74		442.438	17	175
		331.341	18	59		327.397	18	57		441.895	18	150
		330.243	19	57		326.506	19	70		440.06	19	151
		329.952	20	78		325.423	20	61		438.781	20	125
		328.157	21	43		325.405	21	43		437.684	21	116
		328.013	22	46		324.993	22	47		432.925	22	119
		326.894	23	42		323.63	23	35		429.158	23	102
		326.17	24	43		321.956	24	35		426.487	24	92
		325.843	25	41		320.981	25	29		423.242	25	74
		323.834	26	29		316.744	26	25		422.409	26	51
		322.644	27	33		315.304	27	17		421.447	27	47
		322.303	28	27		315.044	28	26		421.424	28	51
		320.768	29	30		314.847	29	15		416.659	29	35
		319.308	30	28		314.488	30	26		414.704	30	37
		318.503	31	29		312.758	31	15		410.342	31	36
		318.235	32	32		312.459	32	18		406.633	32	25
		317.977	33	14		311.949	33	11		405.987	33	22
		317.51	34	10		311.221	34	11		405.229	34	37
		314.838	35	9		310.261	35	2		403.892	35	25
		313.26	36	2		310.069	36	6		402.578	36	15
		312.602	37	3		309.879	37	1		401.751	37	20
		312.23	38	2		308.368	38	1		401.253	38	9
		312.001	39	1		308.001	39	1		400.543	39	9
		311.96	40	0		307.712	40	0		399.723	40	7
		311.397	41	1		305.82	41	1		397.035	41	7
		311.34	42	1		305.524	42	1		396.56	42	8
		310.746	43	0		304.76	43	0		396.384	43	3
		309.679	44	0		303.615	44	1		393.322	44	6
		309.675	45	0		303.259	45	0		392.995	45	3
		309.514	46	0		303.058	46	0		391.414	46	5
		309.478	47	0		302.834	47	0		385.915	47	5
		309.178	48	0		302.444	48	0		385.736	48	2
		308.52	49	0		302.342	49	0		384.214	49	3
		308.283	50	0		302.244	50	2		383.255	50	2
		307.967	51	0		302.219	51	1		381.801	51	1
		306.88	52	0		301.819	52	0		381.048	52	0
		306.297	53	0		301.743	53	0		380.596	53	0
		306.23	54	0		301.688	54	1		378.2	54	1
		306.11				299.27				376.546
		305.62		2757		298.392		2512		376.454		3310
		305.316				297.492				376.342
		304.993				297.459				374.511
		304.852				296.209				373.032
		304.281				295.383				371.295
		303.779				294.367				371.096
		303.742				294.301				371.079
		303.409				292.784				366.81
		303.292				292.34				364.619
		303.279				291.767				362.583
		302.38				291.685				361.695
		301.896				291.681				361.654
		301.596				291.415				361.224
		301.548				290.425				360.533
		301.319				289.887				360.436
		301.057				289.481				360.266
		300.903				289.319				359.231
		300.776				288.847				358.68
		300.596				288.637				358.503
		300.593				288.478				358.448
		298.661				288.115				358.319
		298.586				288.114				358.317
		297.975				288.022				357.042
		297.922				287.654				356.58
		297.771				287.119				356.29
		297.74				286.516				355.774
		297.702				285.546				355.412
		297.031				284.941				355.281
		296.782				284.484				355.238
		296.219				284.098				354.326
		296.126				283.56				353.977
		296.057				283.16				353.927
		295.956				283.153				353.672
		295.392				282.667				352.865
		294.652				282.54				352.439
		294.642				282.407				352.353
		294.224				282.278				349.022
		294.031				280.968				347.714
		293.934				280.478				345.986
		293.826				280.011				345.334
		293.591				279.267				345.236
		292.464				279.079				344.609
		292.447				278.437				342.511
		292.39				277.924				342.346
		291.858				277.728				342.246
		291.713				277.133				342.241
		291.078				277.087				341.456
		290.974				277.04				341.415
		290.277				274.124				341.219
		289.717				274.094				341.003
		289.131				273.662				340.563
		289.066				273.445				339.891
		288.713				272.297				339.457
		288.305				271.888				338.783
		288.295				270.738				338.499
		287.372				269.981				336.942
		285.962				269.651				336.874
		285.265				269.321				336.268
		285.024				268.703				336.025
		284.895				268.318				335.962
		284.889				267.699				335.833
		284.698				267.697				334.836
		283.947				267.531				334.799
		283.902				266.535				334.743
		283.885				266.49				334.263
		283.424				265.999				333.805
		283.11				265.76				333.797
		283.014				264.832				333.747
		282.909				264.76				333.548
		282.441				264.453				333.505
		282.188				264.439				333.138
		282.122				263.873				333.069
		281.998				263.409				331.663
		281.647				262.963				331.579
		281.519				262.792				331.525
		281.29				262.769				331.329
		281.054				262.466				329.811
		279.928				261.998				329.76
		279.66				261.857				329.707
		279.567				261.455				329.617
		279.547				260.298				329.27
		278.935				259.771				329.212
		278.868				259.126				328.992
		278.481				257.402				328.747
		278.461				257.197				328.744
		278.222				256.731				328.483
		277.519				256.69				328.296
		277.149				256.249				327.406
		276.995				256.03				327.13
		276.016				255.585				327.042
		275.821				255.413				326.745
		275.601				254.637				326.444
		274.114				254.03				325.772
		273.939				253.378				325.696
		273.502				251.576				325.547
		273.477				251.505				325.29
		273.343				251.228				325.228
		273.249				251.156				325.107
		272.949				249.875				324.781
		272.56				249.662				324.035
		272.508				249.131				323.743
		271.991				248.871				323.641
		271.315				248.131				321.924
		271.049				247.301				321.446
		270.422				246.945				321.333
		270.148				246.766				321.329
		270.014				245.342				320.865
		269.271				245.315				320.649
		268.7				245.296				320.634
		268.343				245.026				320.234
		268.014				244.59				320.181
		268.013				244.549				320.158
		267.511				244.502				320.052
		267.233				243.15				319.78
		267.213				242.703				319.718
		266.836				242.59				319.54
		266.711				242.088				318.952
		266.509				241.203				318.951
		265.806				240.793				318.323
		265.632				240.572				318.301
		265.423				240.464				318.276
		265.132				240.257				317.919
		264.696				240.167				316.58
		264.265				239.987				315.618
		264.217				239.559				315.482
		264.138				239.271				314.654
		263.698				239.074				314.571
		263				238.285				314.493
		262.561				238.224				314.035
		262.353				237.957				313.337
		262.006				237.473				313.326
		261.617				237.348				312.845
		261.364				237.339				312.305
		261.262				236.974				310.983
		259.957				236.46				310.039
		259.115				236.208				309.678
		258.815				235.929				309.032
		258.729				235.467				307.569
		258.723				234.739				307.268
		258.587				234.703				307.141
		258.347				234.097				307.14
		257.62				234.016				306.659
		257.263				233.261				306.443
		257.252				232.836				306.341
		257.227				232.807				305.945
		257.063				232.662				305.579
		256.776				232.068				305.574
		256.579				231.815				305.547
		256.484				231.647				305.039
		256.31				231.346				304.923
		256.131				231.089				304.595
		255.804				230.139				304.008
		254.678				229.983				303.117
		254.677				229.286				302.932
		254.638				229.267				302.846
		254.14				228.866				301.471
		253.498				228.474				300.984
		252.874				228.389				300.853
		252.575				227.469				300.357
		252.402				227.359				300.098
		252.349				227.177				299.904
		252.336				226.635				299.406
		252.014				226.41				299.342
		250.3				225.865				299.079
		250.145				225.359				298.473
		250.129				225.238				298.157
		250.001				223.813				298.145
		249.608				223.411				296.781
		248.859				223.25				296.704
		248.848				223.243				296.308
		246.896				223.195				296.273
		246.835				223.096				296.141
		246.406				222.979				296.049
		246.337				222.914				295.847
		246.03				222.861				295.767
		245.651				222.481				295.391
		245.554				222.364				295.032
		245.121				222.349				294.942
		245.103				222.143				294.887
		244.944				221.916				294.681
		244.782				221.835				294.599
		244.71				221.789				294.254
		244.582				221.667				294.243
		244.034				221.593				293.879
		243.989				221.55				293.356
		243.78				221.459				293.095
		242.41				220.611				292.661
		242.273				219.697				292.598
		241.755				219.595				292.267
		241.673				219.448				292.172
		241.507				219.401				291.85
		241.503				219.21				291.269
		240.479				218.873				290.976
		240.27				218.841				290.931
		240.101				218.295				290.721
		240.001				218.227				290.421
		239.599				217.718				289.794
		239.553				216.791				289.787
		239.378				216.738				289.652
		238.786				216.671				289.446
		238.723				216.599				289.109
		238.572				215.644				289.067
		238.146				215.367				289.034
		237.915				214.953				289.032
		237.835				214.915				289.023
		236.954				214.841				288.547
		236.411				214.297				288.208
		236.39				214.092				287.689
		236.318				213.95				287.534
		236.189				213.346				287.114
		235.917				213.336				287.034
		235.444				213.071				286.581
		235.406				212.995				286.504
		235.209				212.642				285.181
		235.139				212.478				285.122
		234.99				212.104				284.858
		234.666				211.938				284.251
		234.658				211.444				283.868
		234.268				210.703				283.269
		234.203				210.636				282.881
		233.861				210.51				282.739
		233.828				210.498				282.535
		233.508				209.995				282.24
		233.474				209.74				281.382
		233.326				209.666				281.153
		233.037				209.518				281.055
		232.74				209.393				280.894
		232.1				209.16				280.855
		231.82				209.138				280.833
		231.811				209.001				280.535
		231.497				208.653				280.531
		231.283				208.211				280.257
		230.711				207.844				280.009
		230.709				207.752				279.899
		230.487				207.509				279.555
		230.377				207.265				279.373
		230.272				207.061				278.857
		229.401				206.172				278.49
		229.063				205.487				278.258
		228.921				204.651				278.129
		228.669				204.373				277.381
		228.603				204.326				277.172
		228.575				204.132				277.001
		227.979				203.91				276.939
		227.569				203.7				276.831
		227.427				203.454				276.552
		227.367				203.266				276.42
		227.293				202.9				275.931
		226.885				202.695				275.741
		226.813				202.615				275.462
		226.642				202.48				275.187
		226.414				202.452				275.082
		226.367				202.138				274.695
		225.971				201.981				274.649
		225.694				201.948				274.353
		225.359				201.861				274.051
		225.288				201.836				273.957
		225.122				201.717				272.986
		224.928				201.346				272.886
		224.51				201.318				272.302
		224.5				201.318				271.724
		224.445				201.145				271.634
		224.318				200.964				271.609
		223.721				200.866				271.268
		223.556				200.634				270.83
		223.521				200.602				270.577
		223.41				200.505				270.29
		223.282				200.497				270.254
		222.998				200.464				269.877
		222.82				199.866				269.662
		222.713				199.863				269.045
		222.375				199.819				269.041
		221.819				199.587				268.543
		221.579				199.486				267.789
		221.55				199.46				267.737
		221.244				199.372				267.52
		221.219				198.991				267.346
		220.419				198.516				267.267
		220.249				198.114				267.137
		220.088				198.034				266.986
		219.858				198.024				266.985
		219.767				196.772				266.918
		219.599				196.532				266.667
		219.219				196.218				266.577
		218.616				196.055				265.492
		218.232				195.33				265.474
		218.157				195.181				265.448
		218.127				195.05				265.157
		217.965				194.844				265.037
		217.709				193.997				264.875
		217.448				193.861				264.827
		217.371				193.779				264.788
		216.66				193.638				264.634
		216.342				193.187				264.481
		216.299				193.036				264.471
		216.1				192.567				264.341
		215.685				192.548				264.305
		215.618				192.479				263.858
		215.388				192.262				263.827
		214.875				191.916				263.544
		214.256				191.826				263.327
		213.924				191.756				263.092
		213.64				191.653				262.782
		213.589				191.481				262.421
		213.363				191.472				261.959
		213.246				191.202				261.955
		213.099				191.084				261.9
		213.084				190.746				261.889
		212.8				190.413				261.385
		212.77				190.298				261.384
		212.766				190.266				261.296
		212.601				190.078				260.897
		212.268				189.827				260.795
		212.219				189.747				260.57
		211.864				189.315				260.56
		211.691				189.115				260.482
		211.318				188.901				260.286
		211.252				188.599				260.054
		211.037				188.497				260.03
		210.892				188.485				259.801
		210.441				188.347				259.689
		210.041				188.146				259.491
		207.898				188.112				259.405
		207.86				187.92				259.094
		207.767				187.91				258.92
		207.388				187.623				258.72
		207.312				187.557				258.586
		207.293				187.55				258.583
		206.595				187.482				258.214
		206.356				187.338				258.214
		206.075				187.29				258.03
		205.913				186.985				257.718
		205.91				186.978				257.619
		205.468				186.902				257.531
		205.419				186.794				257.351
		204.849				186.219				257.342
		204.846				186.049				257.31
		204.844				186.018				257.242
		204.718				185.952				256.346
		204.58				185.584				255.692
		204.54				185.401				255.688
		204.522				185.127				255.503
		204.209				185.118				255.026
		204.147				185.075				254.908
		204.111				184.651				254.857
		204.051				184.492				254.75
		203.935				184.483				254.696
		203.507				184.318				254.549
		203.467				184.265				253.557
		203.332				184.091				253.278
		202.8				183.981				253.195
		202.293				183.659				253.115
		202.282				183.614				253.081
		202.177				183.448				252.963
		202.145				183.087				252.602
		202.035				182.844				252.302
		202.033				182.829				252.281
		201.904				182.78				251.871
		201.662				182.508				251.514
		201.457				182.32				251.469
		201.179				182.269				251.412
		201.121				182.105				251.284
		200.49				181.862				251.068
		200.351				181.792				251.012
		200.312				181.157				250.829
		200.179				181.115				250.661
		200.156				180.992				249.666
		200.005				180.988				249.515
		199.746				180.963				249.424
		199.508				180.63				248.777
		199.345				180.629				248.621
		198.813				180.62				248.464
		198.411				180.288				248.177
		198.401				179.99				248.16
		198.314				179.722				248.087
		198.186				179.65				248.043
		198.028				179.557				247.572
		197.937				179.348				247.365
		197.935				178.99				247.229
		197.67				178.987				247.095
		197.467				178.886				246.691
		196.932				178.773				246.52
		196.727				178.536				246.232
		196.373				178.465				246.209
		196.112				178.399				245.396
		195.662				178.333				245.064
		195.486				178.257				244.867
		195.273				178.187				244.649
		194.592				178.049				244.152
		194.189				177.915				244.136
		194.028				177.901				243.834
		193.708				177.605				243.547
		193.545				177.567				243.543
		193.371				177.399				243.36
		193.2				177.331				243.251
		193.113				177.308				242.93
		193.074				177.3				242.529
		193.072				177.25				242.154
		192.881				177.171				242.093
		192.563				177.168				241.776
		192.377				177.121				241.721
		192.107				177.034				241.573
		191.811				177.008				241.536
		191.793				176.745				241.346
		191.317				176.564				241.169
		191.256				176.425				240.997
		191.067				176.378				240.995
		190.914				176.315				240.939
		190.891				176.147				240.681
		190.417				175.644				240.654
		190.223				175.289				240.555
		189.826				174.626				240.313
		189.749				174.6				240.294
		189.66				174.42				240.216
		189.573				174.351				240.117
		189.495				174.26				240.04
		189.41				174.02				240.036
		189.376				173.646				239.78
		189.353				173.565				239.612
		189.213				173.503				239.55
		189.175				173.492				239.378
		189.146				173.395				239.336
		189.07				173.028				239.317
		189.029				172.463				239.019
		188.788				172.4				238.973
		188.77				172.265				238.409
		188.759				172.228				238.176
		188.635				172.222				238.068
		188.63				171.906				238.006
		188.563				171.894				237.94
		188.296				171.766				237.885
		188.122				171.647				237.059
		188.048				171.328				236.985
		187.875				171.205				236.95
		187.732				171.198				236.881
		187.413				170.884				236.656
		187.294				170.708				236.617
		187.293				170.703				236.561
		187.186				170.693				236.547
		187.179				170.637				236.538
		187.105				170.616				236.428
		186.876				170.568				236.26
		186.775				170.161				236.184
		186.752				169.7				236.154
		186.736				169.483				235.993
		186.488				169.41				235.221
		186.184				169.403				235.052
		185.78				169.31				234.945
		185.51				168.985				234.642
		185.316				168.973				234.521
		185.072				168.971				234.479
		184.651				168.288				234.379
		184.474				167.831				234.319
		184.4				167.708				234.172
		184.104				167.458				234.132
		183.996				167.444				233.998
		183.941				167.441				233.931
		183.92				167.153				233.899
		183.595				167.065				233.879
		183.581				166.896				233.81
		183.565				166.794				233.802
		183.384				166.66				233.674
		183.232				166.386				233.551
		183.096				166.19				233.529
		183.016				166.152				233.46
		182.512				165.593				233.418
		182.463				164.771				233.356
		182.397				164.737				233.028
		182.277				164.703				232.933
		182.11				164.695				232.77
		182.035				164.582				232.688
		181.789				164.564				232.686
		181.695				164.469				232.152
		181.645				164.133				232.116
		181.644				163.823				231.928
		181.636				163.622				231.572
		181.601				163.544				231.494
		181.597				163.523				231.148
		181.451				163.375				231.124
		181.158				163.154				231.012
		181.146				163.08				230.89
		181.074				162.943				230.837
		180.729				162.777				230.817
		180.719				162.772				230.772
		180.701				162.77				230.644
		180.666				162.518				230.582
		180.447				162.426				230.458
		180.387				162.134				230.208
		180.114				162.033				230.135
		179.954				162.032				230.122
		179.938				161.837				230.078
		179.937				161.666				229.89
		179.649				161.597				229.717
		179.613				161.482				229.702
		179.59				161.226				228.969
		179.484				161.219				228.886
		179.322				160.966				228.844
		179.273				160.67				228.68
		179.265				160.476				228.611
		179.04				160.264				228.582
		178.99				159.805				228.355
		178.671				159.747				228.2
		178.503				159.515				228.082
		178.483				159.398				228.033
		178.47				159.378				227.752
		178.291				159.292				227.732
		178.285				159.023				227.685
		177.951				158.826				227.616
		177.008				158.721				227.602
		176.081				158.396				227.566
		175.933				158.349				227.123
		175.865				158.234				227.078
		175.53				158.146				227.056
		175.411				158.112				227.052
		175.03				158.088				226.916
		174.958				157.775				226.832
		174.878				157.685				226.793
		174.84				157.547				226.721
		174.581				157.347				226.664
		174.182				156.972				226.644
		173.84				156.913				226.499
		173.789				156.871				226.447
		173.753				156.854				226.373
		173.746				156.817				226.229
		173.714				156.657				226.066
		173.666				156.631				225.938
		173.291				156.549				225.827
		173.168				156.481				225.741
		172.999				156.079				225.619
		172.943				155.902				225.413
		172.596				155.837				225.011
		172.584				155.67				225.009
		172.305				155.618				224.972
		171.967				155.528				224.824
		171.83				155.491				224.778
		171.826				155.286				224.702
		171.773				155.279				224.693
		171.731				155.216				224.604
		171.578				155.151				224.464
		171.453				155.036				224.423
		171.329				154.93				224.393
		171.148				154.75				224.354
		170.937				154.607				224.343
		170.82				154.569				224.328
		170.235				154.481				224.308
		170.223				154.372				224.296
		169.783				154.224				224.266
		169.334				154.091				224.264
		168.887				153.848				224.245
		168.884				153.219				223.832
		168.88				153.119				223.722
		168.786				153.101				223.548
		168.779				153.006				223.492
		168.754				152.755				223.333
		168.398				152.677				223.326
		168.393				152.42				223.314
		168.33				152.386				223.147
		168.24				152.29				223.002
		168.222				152.231				222.586
		168.184				152.159				222.483
		168.029				152.037				222.476
		167.998				151.942				222.254
		167.859				151.939				222.177
		167.742				151.693				222.17
		167.59				151.685				222.145
		167.544				151.308				222.121
		167.354				151.179				222.096
		167.25				151.138				222.039
		166.552				151.006				221.992
		166.081				150.98				221.526
		165.303				150.895				221.4
		165.261				150.698				221.196
		165.133				150.539				221.136
		165.107				150.311				221.016
		165.097				149.689				220.936
		164.972				149.668				220.787
		164.81				149.591				220.754
		164.663				149.585				220.751
		164.495				149.433				220.72
		164.343				149.422				220.585
		164.259				149.401				220.58
		164.188				149.051				220.454
		164.175				148.867				220.351
		164.115				148.79				219.963
		164.032				148.664				219.851
		163.962				148.643				219.718
		163.958				148.247				219.708
		163.919				148.095				219.706
		163.594				147.874				219.698
		163.587				147.768				219.358
		163.572				147.716				219.275
		163.57				147.694				219.248
		163.318				147.642				219.185
		162.877				147.632				218.909
		162.863				147.214				218.87
		162.828				147.19				218.856
		162.623				147.184				218.83
		162.331				147.176				218.822
		161.615				147.142				218.817
		161.547				147.059				218.747
		161.315				146.944				218.745
		161.182				146.717				218.693
		161.021				146.512				218.532
		160.4				146.299				218.46
		160.203				146.217				218.371
		159.784				146.158				218.05
		159.742				146.099				217.938
		159.414				145.88				217.923
		159.279				145.8				217.881
		159.276				145.752				217.86
		159.212				145.677				217.802
		159.072				145.649				217.37
		159.027				145.614				217.271
		158.967				145.518				217.208
		158.75				145.51				217.06
		158.621				145.485				216.83
		158.476				145.463				216.45
		158.427				145.377				216.445
		158.373				145.227				216.379
		158.126				145.128				216.365
		158.088				145.121				216.273
		157.887				145.083				216.252
		157.816				144.993				216.222
		157.774				144.959				215.884
		157.741				144.782				215.788
		157.415				144.607				215.749
		157.344				144.361				215.732
		157.279				144.285				215.71
		157.177				144.215				215.665
		157.166				144				215.641
		157.005				143.95				215.544
		156.826				143.863				215.209
		156.595				143.843				215.16
		156.583				143.813				214.898
		156.492				143.734				214.827
		156.339				143.648				214.653
		156.328				143.54				214.585
		156.263				143.506				214.3
		156.049				143.319				214.203
		155.864				143.3				214.182
		155.818				143.257				214.115
		155.47				143.143				214.114
		155.44				143.075				213.88
		155.327				143.031				213.801
		155.289				143.028				213.621
		155.261				143				213.573
		155.119				142.934				213.409
		154.798				142.921				213.394
		154.773				142.686				213.11
		154.764				142.491				212.969
		154.692				142.454				212.922
		154.487				142.432				212.859
		154.444				142.423				212.856
		154.406				142.407				212.85
		154.383				141.655				212.733
		154.288				141.515				212.693
		154.264				141.427				212.689
		154.225				141.383				212.668
		154.21				141.301				212.648
		154.014				141.266				212.412
		153.867				141.171				212.128
		153.864				141.076				212.092
		153.801				141.074				211.866
		153.8				141.03				211.808
		153.609				140.906				211.679
		153.26				140.898				211.478
		153.043				140.634				211.437
		152.877				140.497				211.418
		152.84				140.489				211.343
		152.731				140.487				211.328
		152.436				140.453				211.242
		152.392				140.127				211.205
		152.277				140.028				211.164
		151.953				139.895				211.075
		151.936				139.891				211.036
		151.883				139.845				210.974
		151.845				139.78				210.965
		151.75				139.63				210.937
		151.6				139.511				210.79
		151.584				139.305				210.584
		151.25				139.278				210.508
		150.989				139.207				210.394
		150.926				139.153				210.369
		150.836				139.137				210.174
		150.621				138.824				210.096
		150.599				138.76				209.971
		150.542				138.598				209.694
		150.539				138.555				209.645
		150.483				138.269				209.576
		150.267				138.183				209.51
		150.207				138.134				209.476
		149.831				138.13				209.467
		149.648				138.059				208.728
		149.606				137.905				208.556
		149.077				137.462				208.545
		148.996				137.422				208.436
		148.895				137.373				208.42
		148.802				137.187				208.372
		148.534				137.132				208.334
		148.489				137.07				208.312
		148.447				137.028				207.994
		148.371				136.961				207.826
		148.341				136.786				207.768
		148.334				136.685				207.699
		148.133				136.536				207.554
		147.449				136.444				207.533
		147.372				136.382				207.484
		147.208				136.347				207.428
		147.12				136.195				207.409
		147.077				136.184				207.287
		147.011				136.086				207.221
		146.97				136.07				207.208
		146.955				136.061				207.085
		146.68				135.697				206.959
		146.613				135.497				206.949
		146.487				135.308				206.866
		146.232				135.192				206.725
		145.941				135.099				206.67
		145.898				134.861				206.561
		145.575				134.844				206.516
		145.553				134.789				206.377
		145.5				134.673				206.28
		145.358				134.54				206.158
		145.322				134.503				206.129
		145.289				134.495				206.106
		145.161				134.35				206.056
		145.141				134.235				205.805
		145.027				134.063				205.73
		144.667				134.037				205.599
		144.333				134.022				205.51
		144.204				134.009				205.482
		144.194				134.005				205.297
		144.031				133.95				205.24
		143.991				133.897				205.208
		143.979				133.807				204.974
		143.741				133.788				204.852
		143.404				133.78				204.823
		143.23				133.711				204.649
		143.221				133.481				204.487
		143.186				133.426				204.404
		142.852				133.28				204.395
		142.8				133.252				204.381
		142.58				133.187				204.336
		142.331				133.16				204.33
		142.247				133.105				204.306
		142.192				133.063				204.303
		142.161				132.866				204.259
		142.118				132.618				204.014
		142.061				132.533				203.936
		141.916				132.398				203.91
		141.895				132.036				203.909
		141.812				131.967				203.888
		141.62				131.93				203.833
		141.479				131.781				203.804
		141.359				131.769				203.648
		141.224				131.742				203.564
		141.171				131.696				203.494
		141.13				131.403				203.29
		140.822				131.168				203.183
		140.213				131.141				203.146
		140.191				131.123				203.039
		140.12				131.107				203.003
		140.083				131.095				202.902
		140.064				130.999				202.889
		139.886				130.936				202.862
		139.342				130.798				202.837
		139.184				130.742				202.833
		139.09				130.678				202.794
		139.082				130.467				202.776
		138.988				130.095				202.741
		138.919				130.055				202.655
		138.773				130.051				202.441
		138.727				129.984				202.435
		138.608				129.763				202.365
		137.946				129.736				202.216
		137.333				129.612				202.138
		137.063				129.133				202.084
		136.983				128.931				201.926
		136.955				128.897				201.678
		136.829				128.825				201.661
		136.658				128.761				201.542
		136.424				128.711				201.489
		136.414				128.7				201.457
		136.227				128.636				201.416
		136.075				128.442				201.334
		135.811				128.382				201.277
		135.724				128.339				201.238
		135.632				128.326				201.217
		135.616				128.269				201.06
		135.458				128.198				201.012
		135.303				127.691				200.773
		135.297				127.49				200.756
		134.943				127.293				200.728
		134.893				127.256				200.702
		134.771				127.161				200.677
		134.747				126.612				200.516
		134.717				126.572				200.495
		134.546				126.519				200.486
		134.455				126.446				200.466
		134.343				126.366				200.412
		133.997				126.301				200.342
		133.996				126.299				200.267
		133.976				126.275				200.239
		133.783				126.254				200.039
		133.697				126.157				199.963
		133.661				126.063				199.921
		133.538				126.058				199.851
		133.488				125.854				199.71
		133.434				125.7				199.635
		133.3				125.683				199.488
		133.233				125.646				199.366
		133.205				125.599				199.339
		133.176				125.507				199.309
		133.164				125.392				199.284
		132.842				125.084				198.967
		132.815				124.849				198.932
		132.712				124.769				198.857
		132.629				124.687				198.686
		132.38				124.651				198.612
		132.149				124.602				198.606
		132.111				124.443				198.419
		132.089				124.187				198.408
		131.937				124.137				198.247
		131.874				124.131				198.147
		131.862				124.034				198.044
		131.823				124.017				197.981
		131.773				124.004				197.807
		131.536				123.871				197.807
		131.478				123.831				197.664
		131.407				123.763				197.629
		131.309				123.7				197.571
		131.277				123.572				197.506
		131.235				123.083				197.339
		131.213				123.067				197.315
		131.194				122.979				197.297
		130.924				122.937				197.213
		130.579				122.844				197.046
		130.369				122.714				196.924
		130.361				122.667				196.904
		130.332				122.653				196.903
		130.312				122.625				196.887
		130.294				122.505				196.866
		129.89				122.455				196.857
		129.778				122.434				196.779
		129.47				122.414				196.713
		129.384				122.386				196.669
		129.378				122.162				196.544
		129.283				122.135				196.528
		128.744				121.976				196.45
		128.477				121.753				196.25
		128.454				121.719				196.249
		128.42				121.473				196.148
		128.42				121.363				196.067
		128.287				121.262				196.064
		128.233				121.159				195.952
		128.177				120.987				195.882
		128.038				120.446				195.807
		127.938				120.198				195.778
		127.875				120.059				195.73
		127.537				120.038				195.672
		127.519				120.001				195.632
		127.298				119.87				195.625
		127.283				119.595				195.417
		127.162				119.481				195.314
		127.1				119.418				195.108
		126.677				119.307				195.076
		126.648				119.24				194.935
		126.61				119.14				194.868
		126.565				119.123				194.8
		126.552				119.103				194.741
		126.515				119.088				194.574
		126.37				118.981				194.511
		126.264				118.96				194.43
		126.009				118.876				194.418
		125.885				118.721				194.243
		125.872				118.681				194.223
		125.632				118.581				194.18
		125.331				118.554				194.121
		125.27				118.417				194.104
		125.211				118.385				194.021
		125.118				118.316				194.003
		125.081				118.278				193.953
		124.992				118.184				193.737
		124.989				118.146				193.566
		124.449				118.143				193.547
		124.424				118.069				193.384
		124.346				118.004				193.28
		124.231				117.942				193.242
		123.788				117.842				193.178
		123.607				117.813				193.163
		123.394				117.655				193.096
		123.389				117.64				193.047
		123.309				117.627				192.994
		123.048				117.469				192.933
		122.952				117.414				192.843
		122.927				117.41				192.771
		122.914				117.4				192.504
		122.795				117.305				192.423
		122.757				117.241				192.354
		122.549				116.931				192.236
		122.537				116.791				192.12
		122.488				116.719				192.002
		122.44				116.664				191.981
		122.35				116.568				191.819
		122.292				116.478				191.818
		122.279				116.312				191.647
		122.121				116.043				191.587
		122.085				115.977				191.562
		122.055				115.971				191.477
		121.819				115.933				191.249
		121.769				115.862				191.106
		121.655				115.819				191.095
		121.32				115.368				191.052
		121.284				115.145				190.821
		121.254				114.937				190.744
		121.176				114.886				190.643
		121.153				114.855				190.62
		121.142				114.78				190.506
		121.114				114.735				190.241
		121.089				114.718				190.057
		120.984				114.561				190
		120.895				114.538				189.986
		120.706				114.37				189.915
		120.688				114.369				189.805
		120.661				114.055				189.759
		120.621				113.663				189.718
		120.62				113.49				189.601
		120.593				113.408				189.558
		120.398				113.345				189.543
		120.379				113.319				189.538
		120.182				113.315				189.524
		120.143				113.262				189.507
		120.017				113.23				189.503
		119.878				113.227				189.479
		119.799				113.152				189.324
		119.786				113.017				189.202
		119.745				113.012				189.118
		119.511				112.892				188.889
		119.385				112.873				188.857
		119.375				112.751				188.813
		119.369				112.593				188.806
		119.31				112.437				188.79
		119.286				112.383				188.766
		119.217				112.302				188.557
		119.178				112.22				188.551
		119.155				112.159				188.54
		119.084				112.117				188.536
		118.98				112.117				188.528
		118.976				112.098				188.432
		118.869				111.815				188.266
		118.617				111.677				188.21
		118.529				111.648				188.183
		118.393				111.5				188.18
		118.198				111.41				188.157
		118.122				111.349				188.015
		117.735				111.191				187.877
		117.591				111.112				187.77
		117.59				111.102				187.679
		117.411				111.017				187.522
		117.347				110.949				187.39
		117.268				110.947				187.231
		117.242				110.882				187.109
		117.167				110.768				187.039
		117.125				110.747				186.99
		117.05				110.736				186.77
		117.038				110.516				186.724
		116.743				110.486				186.664
		116.729				110.286				186.662
		116.713				110.105				186.629
		116.678				110.043				186.454
		116.622				109.909				186.413
		116.618				109.864				186.401
		116.459				109.777				186.379
		116.407				109.775				186.336
		116.383				109.749				186.319
		116.368				109.681				186.278
		116.126				109.415				186.176
		116.075				109.359				186.044
		115.738				109.179				186.004
		115.736				109.09				185.927
		115.653				109.022				185.861
		115.332				108.972				185.851
		115.18				108.955				185.821
		114.973				108.607				185.749
		114.777				108.52				185.663
		114.675				108.494				185.587
		114.572				108.468				185.504
		114.553				108.349				185.257
		114.552				108.329				185.223
		114.551				108.265				185.091
		114.533				108.247				185.054
		114.465				108.241				184.919
		114.116				108.214				184.761
		114.038				108.205				184.741
		113.973				108.094				184.598
		113.947				108.016				184.523
		113.784				107.875				184.473
		113.541				107.824				184.341
		113.44				107.784				184.322
		113.413				107.706				184.246
		113.191				107.633				184.129
		113.038				107.413				183.95
		113.028				107.402				183.933
		112.985				107.399				183.855
		112.882				107.328				183.843
		112.866				107.224				183.671
		112.865				107.213				183.616
		112.737				107.206				183.608
		112.537				107.185				183.566
		112.511				107.174				183.221
		112.382				106.99				183.145
		112.202				106.966				183.141
		112.2				106.903				182.896
		112.117				106.893				182.785
		112.036				106.881				182.742
		111.97				106.787				182.53
		111.929				106.773				182.512
		111.919				106.738				182.303
		111.82				106.6				182.258
		111.672				106.433				182.18
		111.613				106.347				182.134
		111.532				106.319				182.035
		111.172				106.129				182.003
		111.099				106.111				181.531
		111.088				105.953				181.524
		110.87				105.879				181.49
		110.856				105.861				181.488
		110.804				105.827				181.254
		110.723				105.803				181.212
		110.632				105.534				181.086
		110.589				105.498				180.765
		110.47				105.458				180.735
		110.462				105.439				180.666
		110.138				105.4				180.612
		110.112				104.925				180.6
		110.075				104.886				180.589
		109.778				104.885				180.577
		109.773				104.742				180.546
		109.748				104.682				180.515
		109.652				104.425				180.438
		109.65				104.421				180.269
		109.604				104.416				180.264
		109.217				104.344				180.122
		109.216				104.154				180.118
		109.182				104.151				180.067
		109.146				104.148				179.991
		109				104.111				179.927
		108.99				104.04				179.846
		108.829				104.005				179.812
		108.575				104.002				179.808
		108.482				104.002				179.786
		108.435				103.913				179.78
		108.426				103.902				179.776
		108.321				103.9				179.775
		108.201				103.852				179.75
		108.077				103.851				179.601
		107.99				103.789				179.471
		107.916				103.735				179.463
		107.914				103.432				179.445
		107.844				103.424				179.387
		107.84				103.422				179.35
		107.52				103.326				179.345
		107.454				103.298				179.317
		107.413				103.282				179.308
		107.412				103.25				179.264
		107.345				103.231				179.253
		107.248				103.226				179.186
		107.21				103.121				179.146
		107.044				103.117				179.141
		106.993				103.08				179.089
		106.776				102.996				178.967
		106.751				102.861				178.755
		106.606				102.842				178.701
		106.538				102.798				178.654
		106.499				102.535				178.619
		106.496				102.511				178.579
		106.456				102.51				178.373
		106.418				102.47				178.361
		106.234				102.424				178.245
		105.974				102.337				178.099
		105.925				102.116				178.007
		105.917				102.019				178.005
		105.698				101.954				177.956
		105.685				101.9				177.852
		105.602				101.845				177.842
		105.536				101.792				177.639
		105.517				101.693				177.635
		105.51				101.68				177.577
		105.404				101.643				177.567
		105.277				101.621				177.54
		105.244				101.474				177.42
		105.091				101.467				177.273
		105.023				101.416				177.181
		104.849				101.318				177.122
		104.763				101.229				177.121
		104.537				101.194				177.095
		104.472				101.149				177.07
		104.306				101.133				176.569
		104.256				100.972				176.506
		104.148				100.88				176.494
		104.137				100.849				176.378
		104.055				100.771				176.338
		103.947				100.652				176.31
		103.813				100.628				176.204
		103.635				100.592				176.035
		103.506				100.538				175.995
		103.455				100.346				175.871
		103.421				100.172				175.856
		103.373				100.135				175.798
		103.243				100.073				175.755
		103.191				100.051				175.733
		103.131				99.9791				175.684
		103.001				99.9165				175.65
		102.999				99.813				175.568
		102.942				99.8119				175.478
		102.938				99.6706				175.387
		102.855				99.6305				175.271
		102.784				99.5992				175.232
		102.708				99.5961				175.18
		102.59				99.2703				175.157
		102.546				99.114				175.084
		102.483				99.1003				174.944
		102.422				98.8873				174.795
		102.341				98.7773				174.782
		102.125				98.7435				174.738
		102.055				98.6481				174.614
		102.027				98.5814				174.571
		101.577				98.5197				174.427
		101.576				98.4766				174.197
		101.249				98.4572				174.186
		101.14				98.2944				174.173
		101.069				98.2094				174.144
		101.026				98.1837				174.08
		101.011				98.1433				174.036
		101				98.1392				173.958
		100.937				98.0973				173.948
		100.903				98.0279				173.938
		100.771				98.0088				173.759
		100.756				97.748				173.743
		100.735				97.6847				173.514
		100.695				97.5736				173.509
		100.679				97.5138				173.464
		100.599				97.5128				173.431
		100.431				97.3841				173.427
		100.357				97.3418				173.297
		100.277				97.2676				173.218
		100.216				97.1021				173.182
		100.014				97.0965				173.161
		99.9979				96.9349				173.113
		99.9858				96.9307				173.097
		99.8209				96.822				173.058
		99.7331				96.7269				173.006
		99.7297				96.7109				172.985
		99.7045				96.4545				172.916
		99.656				96.4441				172.865
		99.649				96.1727				172.81
		99.4964				95.9403				172.693
		99.3908				95.8624				172.519
		99.2421				95.674				172.421
		99.1658				95.67				172.366
		99.0737				95.659				172.229
		98.9367				95.6171				172.153
		98.9075				95.5744				172.129
		98.7326				95.5684				171.935
		98.6326				95.4805				171.818
		98.5323				95.2655				171.746
		98.4248				95.2064				171.661
		98.4025				95.1291				171.637
		98.3477				95.0778				171.582
		98.0817				95.0569				171.536
		98.0476				95.0283				171.465
		97.704				95.0018				171.459
		97.6705				94.9878				171.372
		97.4955				94.9529				171.233
		97.394				94.8689				171.141
		97.2637				94.8674				171.088
		97.1769				94.8649				171.077
		97.1408				94.8263				171.063
		97.0832				94.7642				170.911
		97.0351				94.5543				170.852
		96.9781				94.5023				170.841
		96.9242				94.3908				170.805
		96.8376				94.3547				170.795
		96.8242				94.2455				170.726
		96.7725				94.2319				170.72
		96.6678				94.1821				170.695
		96.4276				94.1798				170.506
		96.3463				94.1575				170.453
		96.2523				94.0557				170.438
		96.2192				94.0019				170.38
		96.0942				93.6267				170.319
		95.9379				93.493				170.286
		95.8796				93.1774				170.121
		95.879				93.1175				170.094
		95.7884				92.9699				170.076
		95.7473				92.6644				170.054
		95.6809				92.5538				169.883
		95.5093				92.5211				169.857
		95.5033				92.5105				169.804
		95.3832				92.4671				169.779
		95.3379				92.3725				169.366
		95.1755				92.3385				169.32
		95.1718				92.2168				169.169
		95.0802				92.1712				169.138
		94.6838				92.1558				169.133
		94.6647				92.081				169.014
		94.4797				91.9732				168.975
		94.3899				91.8912				168.907
		94.3142				91.7036				168.829
		94.3133				91.5754				168.76
		94.227				91.4693				168.688
		94.1521				91.3905				168.613
		94.0924				91.3375				168.568
		94.0875				91.2814				168.531
		94.082				91.2447				168.51
		94.0311				91.2082				168.491
		93.9117				91.1807				168.381
		93.7777				91.1666				168.236
		93.7693				91.1461				168.193
		93.6715				90.9372				168.093
		93.6531				90.8557				167.9
		93.5931				90.8525				167.842
		93.5676				90.725				167.459
		93.4607				90.6008				167.368
		93.4476				90.588				167.35
		93.3184				90.5491				167.334
		93.2387				90.5127				167.296
		92.974				90.3787				167.085
		92.9326				90.3725				167.066
		92.8514				90.2643				167.03
		92.7118				90.2229				167.027
		92.6784				90.2217				167.004
		92.51				90.0275				166.796
		92.4957				90.0158				166.675
		92.3682				89.9271				166.546
		92.2368				89.91				166.529
		92.222				89.859				166.492
		92.1575				89.8401				166.451
		92.1455				89.6898				166.443
		92.1285				89.6683				166.377
		91.9908				89.3888				166.327
		91.8837				89.3327				166.309
		91.8067				89.3165				166.282
		91.5635				89.3041				166.252
		91.5212				89.2876				166.134
		91.3889				89.2822				165.872
		91.2809				89.1719				165.855
		91.1828				89.148				165.685
		91.1312				88.9712				165.643
		91.0288				88.9657				165.578
		91.012				88.9492				165.462
		90.9972				88.9468				165.447
		90.997				88.7866				165.378
		90.9559				88.7168				165.375
		90.862				88.6663				165.201
		90.8311				88.6452				165.198
		90.792				88.4686				165.191
		90.7751				88.4613				165.141
		90.7736				88.4607				164.952
		90.7717				88.3826				164.947
		90.7674				88.3182				164.939
		90.7476				88.3101				164.92
		90.7132				88.0645				164.799
		90.5664				88.0221				164.791
		90.5101				87.9031				164.79
		90.4117				87.8631				164.767
		90.3843				87.6977				164.675
		90.376				87.6881				164.673
		90.2363				87.6733				164.646
		90.235				87.6181				164.639
		90.1936				87.6133				164.637
		90.1297				87.5703				164.568
		89.9787				87.5592				164.565
		89.9675				87.4062				164.459
		89.9624				87.4034				164.446
		89.9282				87.3911				164.406
		89.9104				87.2263				164.393
		89.8797				87.1741				164.36
		89.7304				87.1031				164.202
		89.6718				87.0245				164.039
		89.6294				86.6879				164.037
		89.4997				86.6526				164.034
		89.3933				86.4844				164.025
		89.3277				86.4445				163.988
		89.2672				86.4384				163.979
		89.2621				86.3578				163.852
		89.2553				86.296				163.786
		89.2385				86.2638				163.778
		89.1503				86.2452				163.768
		89.1205				86.2443				163.682
		89.089				86.1735				163.68
		88.8782				86.1588				163.607
		88.8143				86.1004				163.571
		88.8138				86.0287				163.517
		88.7126				85.9402				163.467
		88.6916				85.8872				163.362
		88.6675				85.8845				163.358
		88.6484				85.8477				163.322
		88.6329				85.6889				163.302
		88.5655				85.5488				163.301
		88.5541				85.4501				163.143
		88.2584				85.4277				163.108
		88.0485				85.4197				163.034
		88.0444				85.404				162.86
		87.9515				85.3597				162.849
		87.9065				85.3144				162.724
		87.8538				85.2222				162.625
		87.6956				85.1763				162.454
		87.6515				85.0571				162.381
		87.5883				84.8259				162.292
		87.572				84.749				162.278
		87.5148				84.5918				162.178
		87.3975				84.583				162.177
		87.3275				84.548				162.13
		87.3231				84.5075				162.036
		87.306				84.4958				161.842
		87.2556				84.4671				161.833
		87.1524				84.4547				161.53
		87.0335				84.3913				161.503
		87.024				84.3668				161.467
		86.976				84.3535				161.465
		86.9723				84.3072				161.401
		86.8955				84.2754				161.375
		86.8953				84.2671				161.151
		86.8802				84.1419				161.112
		86.7111				83.8088				161.03
		86.7017				83.808				160.947
		86.6097				83.7863				160.943
		86.5904				83.7186				160.895
		86.5344				83.502				160.893
		86.4715				83.4799				160.889
		86.4481				83.3789				160.878
		86.3769				83.3609				160.821
		86.3684				83.3326				160.816
		86.1139				83.2618				160.815
		86.0375				83.0991				160.567
		85.963				83.0146				160.565
		85.9007				82.9354				160.509
		85.7701				82.8415				160.48
		85.7551				82.7916				160.429
		85.6246				82.4525				160.401
		85.5592				82.377				160.382
		85.4442				82.3553				160.35
		85.4399				82.3118				160.328
		85.2966				82.1666				160.054
		85.2374				82.1541				160.036
		85.1518				82.1137				159.98
		85.1392				82.0268				159.973
		85.0753				82.0079				159.968
		85.005				81.9047				159.955
		84.9448				81.8728				159.904
		84.932				81.7517				159.904
		84.9176				81.7369				159.843
		84.8629				81.6987				159.82
		84.7781				81.6619				159.814
		84.6693				81.66				159.812
		84.5781				81.649				159.745
		84.4606				81.6233				159.624
		84.4199				81.529				159.56
		84.4042				81.2644				159.558
		84.3439				81.2422				159.536
		84.3174				81.2097				159.493
		84.2705				81.1596				159.457
		84.0818				81.1435				159.41
		84.0647				81.0853				159.402
		84.0303				81.0111				159.26
		83.975				80.9585				159.174
		83.8099				80.894				159.163
		83.6499				80.8334				159.154
		83.5407				80.8309				159.118
		83.5272				80.7894				159.018
		83.43				80.7103				158.986
		83.2811				80.7073				158.95
		83.2526				80.6797				158.92
		83.2185				80.6074				158.886
		83.1682				80.5822				158.873
		83.0504				80.5574				158.826
		83.0435				80.5203				158.649
		83.0271				80.4981				158.615
		83.0259				80.4597				158.48
		83.0128				80.3952				158.352
		83.0085				80.3487				158.316
		82.882				80.2441				158.133
		82.7828				80.2099				158.108
		82.7492				80.0998				158.087
		82.6601				80.0684				158.039
		82.6506				79.9773				158.003
		82.3806				79.9196				157.964
		82.1894				79.8988				157.917
		82.1047				79.8594				157.911
		82.0917				79.8425				157.891
		82.0666				79.8186				157.876
		81.8965				79.7198				157.661
		81.8739				79.4847				157.459
		81.8518				79.4259				157.439
		81.8403				79.4135				157.43
		81.7966				79.3891				157.408
		81.7477				79.3812				157.341
		81.6671				79.267				157.334
		81.4419				79.2348				157.319
		81.3888				79.1763				157.261
		81.267				79.1586				157.152
		81.2445				79.1161				157.148
		81.2285				79.0537				156.975
		81.1343				78.9586				156.932
		81.1237				78.8409				156.879
		81.1225				78.7147				156.877
		81.0533				78.7043				156.807
		80.9555				78.697				156.673
		80.929				78.6939				156.636
		80.8333				78.6557				156.572
		80.802				78.5406				156.56
		80.703				78.523				156.495
		80.5903				78.4392				156.472
		80.541				78.3623				156.444
		80.5398				78.2843				156.205
		80.4203				78.2703				156.152
		80.3278				78.1672				156.128
		80.2593				78.0915				156.119
		80.2429				78.0831				156.047
		80.1973				78.0437				156.04
		80.1325				78.0232				155.871
		80.1136				77.9132				155.85
		80.0958				77.8973				155.819
		79.8939				77.8166				155.704
		79.7286				77.7615				155.653
		79.7015				77.7142				155.622
		79.6689				77.7101				155.557
		79.5629				77.6713				155.376
		79.4315				77.5226				155.316
		79.418				77.5168				155.288
		79.4084				77.4878				155.282
		79.3913				77.1338				155.276
		79.3863				77.0936				155.266
		79.299				77.0672				155.235
		79.2755				76.9372				155.222
		79.23				76.708				155.218
		79.2285				76.6945				155.143
		79.2072				76.6149				155.117
		79.2062				76.5727				155.101
		79.203				76.3972				155.086
		79.0759				76.3497				155.059
		79.0362				76.3219				155.042
		78.7703				76.2153				155.028
		78.7637				76.1764				154.814
		78.7142				76.124				154.808
		78.6735				76.1072				154.719
		78.6714				76.0843				154.706
		78.6259				76.083				154.451
		78.5942				75.8549				154.262
		78.5327				75.74				154.248
		78.4571				75.6888				154.221
		78.3677				75.6887				154.19
		78.3346				75.6562				154.184
		78.3291				75.6163				154.135
		78.2933				75.4497				154.108
		78.2296				75.3608				154.014
		78.1666				75.3451				153.998
		78.152				75.1897				153.952
		78.0686				75.0798				153.905
		78.0592				75.0408				153.889
		77.9951				74.9787				153.853
		77.9878				74.8882				153.8
		77.8448				74.7234				153.738
		77.8082				74.6668				153.668
		77.7069				74.5896				153.625
		77.66				74.4951				153.556
		77.5814				74.4514				153.535
		77.4587				74.4325				153.526
		77.4158				74.3137				153.526
		77.3457				74.3029				153.5
		77.3045				74.2956				153.342
		77.2745				74.2798				153.31
		77.2468				74.2653				153.279
		77.2455				74.2498				153.09
		77.2217				74.2245				153.063
		77.154				74.2122				153.014
		77.0943				74.1791				152.998
		77.0897				73.9977				152.98
		77.0835				73.7993				152.97
		77.0776				73.7493				152.957
		76.9827				73.7416				152.956
		76.9572				73.7138				152.941
		76.9295				73.6418				152.936
		76.8668				73.6345				152.843
		76.7923				73.582				152.783
		76.7635				73.5184				152.543
		76.7344				73.4886				152.5
		76.6599				73.4658				152.471
		76.6126				73.4103				152.419
		76.61				73.281				152.282
		76.6098				73.2421				152.23
		76.6017				73.1838				152.21
		76.5571				73.172				152.178
		76.5368				73.0655				152.136
		76.4478				73.0532				152.069
		76.3383				73.0313				152.029
		76.2584				72.9692				151.839
		76.1832				72.9088				151.834
		76.0714				72.8994				151.727
		76.0479				72.8668				151.685
		75.9305				72.7321				151.656
		75.9141				72.6406				151.651
		75.9106				72.4798				151.577
		75.7904				72.4282				151.544
		75.7454				72.4242				151.419
		75.6524				72.3321				151.388
		75.6239				72.2954				151.036
		75.6062				72.2798				151.024
		75.6009				72.278				150.847
		75.5306				72.0398				150.79
		75.4432				71.9527				150.724
		75.3187				71.9112				150.643
		75.2823				71.8913				150.615
		75.1872				71.8839				150.578
		75.1496				71.8785				150.558
		75.1204				71.8222				150.214
		75.1095				71.7927				150.059
		75.0835				71.7433				150.051
		75.0793				71.6579				150.035
		75.0608				71.6574				150.018
		75.0072				71.5532				149.907
		74.9649				71.5353				149.868
		74.9035				71.5184				149.814
		74.8924				71.4876				149.72
		74.8439				71.38				149.687
		74.8334				71.357				149.635
		74.7509				71.3545				149.599
		74.7472				71.2455				149.521
		74.7432				71.208				149.5
		74.7354				71.1866				149.49
		74.724				71.1675				149.488
		74.4976				71.098				149.479
		74.4685				71.0309				149.384
		74.4571				70.9963				149.337
		74.4072				70.9546				149.334
		74.3471				70.9331				149.313
		74.2537				70.8172				149.244
		74.2495				70.805				149.096
		74.1723				70.7861				148.894
		74.0646				70.7575				148.84
		74.0539				70.7461				148.833
		74.0285				70.7121				148.831
		73.9892				70.6744				148.79
		73.94				70.6478				148.769
		73.9257				70.6111				148.713
		73.8721				70.5465				148.593
		73.7404				70.5435				148.537
		73.6395				70.5343				148.311
		73.6345				70.4517				148.206
		73.5948				70.446				148.165
		73.594				70.4356				148.066
		73.5642				70.3688				147.988
		73.5536				70.3668				147.983
		73.4251				70.3355				147.786
		73.3477				70.2582				147.75
		73.3155				70.2444				147.707
		73.312				70.2041				147.613
		73.2982				70.1794				147.598
		73.2751				70.1689				147.556
		73.275				70.1385				147.538
		73.26				70.1048				147.509
		73.1794				70.1047				147.492
		73.1047				70.0397				147.488
		73.0936				70.0281				147.405
		73.0763				69.9176				147.405
		73.0705				69.7785				147.392
		72.9375				69.7759				147.291
		72.8884				69.6652				147.239
		72.8499				69.6594				147.217
		72.6526				69.5935				147.214
		72.5934				69.5342				147.15
		72.5842				69.4792				147.105
		72.5795				69.444				147.042
		72.4874				69.3803				147.033
		72.4484				69.3257				146.976
		72.3147				69.2992				146.968
		72.3039				69.0147				146.96
		72.197				68.9055				146.862
		72.1858				68.8886				146.845
		72.1717				68.877				146.771
		72.0737				68.872				146.699
		72.0679				68.7723				146.681
		72.0581				68.6277				146.676
		72.0441				68.6235				146.569
		71.9987				68.5762				146.561
		71.9859				68.5192				146.546
		71.9498				68.5167				146.413
		71.9415				68.4819				146.305
		71.9256				68.4582				146.293
		71.9243				68.4496				146.285
		71.844				68.4444				146.172
		71.7555				68.4188				146.135
		71.7054				68.4183				146.108
		71.6617				68.4015				146.08
		71.5228				68.3522				145.945
		71.5155				68.3152				145.926
		71.4413				68.2792				145.64
		71.3914				68.2356				145.546
		71.3233				68.2247				145.508
		71.306				68.2211				145.502
		71.2734				68.1336				145.417
		71.0832				68.0961				145.393
		70.9549				68.0248				145.32
		70.9175				67.7955				145.278
		70.913				67.6674				145.038
		70.8731				67.6606				144.997
		70.8003				67.5966				144.936
		70.7508				67.4231				144.821
		70.5346				67.4113				144.702
		70.4463				67.3777				144.686
		70.4231				67.3628				144.595
		70.3645				67.2271				144.535
		70.3181				67.1914				144.523
		70.1449				67.1733				144.43
		70.1297				67.0325				144.405
		70.1221				67.0278				144.207
		70.0935				66.9006				144.196
		70.0885				66.7927				144.031
		70.0749				66.7616				143.947
		69.972				66.7207				143.919
		69.8888				66.6234				143.838
		69.8761				66.5641				143.833
		69.7606				66.5103				143.805
		69.7504				66.3789				143.802
		69.7467				66.3424				143.729
		69.7314				66.2301				143.636
		69.577				66.1289				143.499
		69.5403				66.1114				143.473
		69.5141				66.056				143.377
		69.5045				66.0247				143.198
		69.4632				65.9811				143.12
		69.4125				65.9239				143.047
		69.4117				65.8712				143.036
		69.3732				65.853				142.995
		69.3669				65.8368				142.81
		69.3311				65.8197				142.773
		69.3247				65.6827				142.718
		69.3088				65.6397				142.698
		69.3003				65.6259				142.653
		69.2397				65.6168				142.642
		69.025				65.6031				142.549
		69.0093				65.5244				142.48
		68.9618				65.3531				142.438
		68.9567				65.3297				142.39
		68.8419				65.2476				142.381
		68.7931				65.2471				142.24
		68.7578				65.2374				142.239
		68.737				65.143				142.042
		68.734				65.1282				142.002
		68.7335				65.0621				141.952
		68.6918				65.0349				141.92
		68.659				64.966				141.894
		68.5843				64.9192				141.883
		68.5234				64.9098				141.703
		68.5092				64.8957				141.52
		68.504				64.8758				141.495
		68.4977				64.8184				141.445
		68.4607				64.7807				141.336
		68.4595				64.7746				141.299
		68.3642				64.7452				141.196
		68.1916				64.6384				141.191
		68.1887				64.626				141.132
		68.1885				64.6131				141.114
		68.1714				64.5737				141.042
		68.1475				64.4419				141.029
		68.1058				64.3862				140.978
		68.0721				64.3792				140.941
		67.9804				64.3102				140.728
		67.8791				64.236				140.721
		67.754				64.1518				140.669
		67.68				64.1063				140.658
		67.6376				64.0934				140.655
		67.5258				64.0221				140.638
		67.5005				63.9614				140.564
		67.403				63.9496				140.402
		67.3966				63.947				140.389
		67.2751				63.8615				140.356
		67.1382				63.8244				140.225
		67.1141				63.6765				140.106
		67.0659				63.6492				140.072
		67.0354				63.6348				140.025
		66.9322				63.5629				140.008
		66.9011				63.483				139.741
		66.7473				63.4311				139.719
		66.7287				63.3874				139.592
		66.7137				63.2494				139.529
		66.6577				63.2378				139.499
		66.5789				63.1614				139.479
		66.5618				63.1523				139.433
		66.5204				62.7857				139.356
		66.5193				62.7696				139.272
		66.5104				62.7158				139.255
		66.4702				62.7122				139.144
		66.4041				62.7021				139.14
		66.3799				62.6566				138.97
		66.3042				62.5641				138.927
		66.087				62.562				138.925
		66.0728				62.493				138.908
		66.0503				62.4348				138.86
		65.9818				62.3738				138.779
		65.8651				62.2229				138.765
		65.7978				62.195				138.759
		65.763				62.1467				138.734
		65.7502				62.1415				138.725
		65.7256				62.1414				138.696
		65.7014				62.1311				138.692
		65.6153				62.0678				138.645
		65.441				62.0396				138.639
		65.4375				62.0107				138.615
		65.3948				61.8829				138.591
		65.3817				61.8524				138.588
		65.304				61.8278				138.575
		65.2941				61.7444				138.486
		65.2562				61.7329				138.465
		65.2548				61.6866				138.338
		65.2083				61.6345				138.251
		65.181				61.6341				138.153
		65.063				61.5757				137.965
		65.056				61.5673				137.914
		65.0342				61.5017				137.813
		65.0283				61.4688				137.758
		64.9634				61.4624				137.69
		64.8977				61.4457				137.681
		64.7794				61.438				137.566
		64.6497				61.4264				137.511
		64.6004				61.3901				137.216
		64.5703				61.3546				137.187
		64.5604				61.2249				137.041
		64.4657				61.1465				137.04
		64.4652				61.1137				136.933
		64.4554				61.057				136.918
		64.4157				61.037				136.867
		64.3667				60.973				136.848
		64.3374				60.9176				136.824
		64.1953				60.8528				136.73
		64.184				60.8133				136.695
		64.1124				60.7453				136.675
		64.0894				60.6362				136.674
		64.0436				60.6315				136.674
		63.9476				60.3001				136.651
		63.9018				60.2795				136.574
		63.8555				60.2791				136.494
		63.8483				60.2543				136.492
		63.813				60.207				136.441
		63.7966				60.1825				136.38
		63.7641				60.1502				136.298
		63.7553				60.1501				136.165
		63.7166				60.1481				136.13
		63.6875				60.1223				136.13
		63.6443				59.9815				136.07
		63.6317				59.8013				136.021
		63.5943				59.7952				136.009
		63.5798				59.7504				135.857
		63.4755				59.7491				135.79
		63.4726				59.2047				135.626
		63.4517				59.1787				135.611
		63.4258				59.0937				135.598
		63.3979				59.0436				135.593
		63.3284				58.948				135.535
		63.2987				58.897				135.5
		63.2514				58.8926				135.307
		63.1694				58.7926				135.251
		63.1577				58.7459				135.197
		63.1525				58.7388				135.051
		63.1058				58.6362				135.028
		63.1035				58.5934				135.002
		63.0584				58.5833				134.9
		63.0559				58.5773				134.875
		63.0248				58.5143				134.853
		63.021				58.4724				134.776
		62.9753				58.47				134.727
		62.8944				58.2651				134.698
		62.8234				58.2117				134.618
		62.8002				58.164				134.469
		62.7235				58.1627				134.373
		62.6455				58.1088				134.319
		62.6419				58.0871				134.304
		62.6377				58.0245				134.248
		62.582				58.0054				134.238
		62.5667				57.9672				134.227
		62.5455				57.8961				134.227
		62.5333				57.896				134.223
		62.5041				57.887				134.174
		62.4688				57.8756				134.15
		62.4416				57.8389				134.142
		62.4275				57.8333				134.083
		62.3831				57.6798				133.982
		62.3617				57.6163				133.943
		62.3116				57.5397				133.863
		62.3045				57.5154				133.767
		62.3009				57.472				133.761
		62.2499				57.4245				133.679
		62.1649				57.3764				133.613
		62.1223				57.357				133.476
		62.0918				57.2242				133.445
		61.8801				57.1991				133.443
		61.8743				57.0684				133.385
		61.8612				56.9667				133.299
		61.8528				56.963				133.255
		61.8219				56.9139				133.181
		61.8047				56.8599				133.149
		61.6809				56.806				132.928
		61.6451				56.7906				132.923
		61.6076				56.77				132.898
		61.5834				56.6903				132.881
		61.5739				56.6764				132.724
		61.4598				56.6345				132.664
		61.4354				56.6286				132.623
		61.237				56.6159				132.586
		61.1818				56.612				132.569
		61.1541				56.5625				132.542
		61.1387				56.5412				132.54
		61.0577				56.5115				132.514
		61.0124				56.4566				132.457
		60.9892				56.3514				132.442
		60.9677				56.3065				132.394
		60.8437				56.2517				132.326
		60.831				56.2407				132.269
		60.7544				56.028				132.219
		60.754				56.0189				132.163
		60.7439				56.0159				132.092
		60.6833				55.9986				132.081
		60.5721				55.9952				132.033
		60.5696				55.9445				132.024
		60.5234				55.8658				131.851
		60.5232				55.8548				131.816
		60.3972				55.8307				131.795
		60.3846				55.8244				131.758
		60.38				55.8099				131.708
		60.3237				55.741				131.598
		60.321				55.6311				131.541
		60.3005				55.6169				131.335
		60.2917				55.5312				131.242
		60.2813				55.4998				131.195
		60.1797				55.4887				131.188
		60.179				55.4686				131.011
		60.1671				55.4439				130.963
		60.1143				55.4228				130.949
		60.0129				55.407				130.922
		60.0064				55.3704				130.741
		59.9917				55.3342				130.62
		59.9504				55.3296				130.595
		59.8468				55.3167				130.54
		59.7877				55.2218				130.525
		59.658				55.2034				130.504
		59.6139				54.9229				130.447
		59.5964				54.9089				130.44
		59.5877				54.9055				130.318
		59.5642				54.8917				130.249
		59.5444				54.8653				130.174
		59.5295				54.7968				130.132
		59.5026				54.7252				130.114
		59.497				54.6501				130.111
		59.4858				54.6283				130.097
		59.4819				54.6067				130.005
		59.4449				54.5253				129.969
		59.3153				54.5211				129.967
		59.3127				54.4445				129.916
		59.2157				54.2329				129.828
		59.1996				54.2035				129.654
		59.123				54.1854				129.599
		59.0464				54.0841				129.597
		58.9306				54.0312				129.551
		58.9025				54.028				129.447
		58.8967				54.0204				129.352
		58.8262				53.9953				129.348
		58.7874				53.9161				129.332
		58.7309				53.8879				129.307
		58.7107				53.8868				129.145
		58.6722				53.8558				129.129
		58.6419				53.7936				129.124
		58.6004				53.7719				129.093
		58.5888				53.7544				128.906
		58.4652				53.6313				128.642
		58.3891				53.6302				128.569
		58.3881				53.611				128.493
		58.3688				53.5068				128.329
		58.2849				53.479				128.282
		58.2545				53.4375				128.188
		58.1852				53.4197				128.156
		58.1235				53.3685				128.148
		58.082				53.3574				128.063
		57.973				53.3458				127.884
		57.926				53.3357				127.88
		57.8966				53.2979				127.778
		57.8107				53.1643				127.772
		57.7582				53.1528				127.69
		57.7069				53.1149				127.543
		57.6987				53.1065				127.48
		57.5846				53.0941				127.427
		57.4844				52.945				127.373
		57.4429				52.8981				127.341
		57.4243				52.7848				127.255
		57.4032				52.7535				127.029
		57.3123				52.7531				127.014
		57.1544				52.7318				127.013
		57.0643				52.7189				127.002
		56.987				52.6795				126.977
		56.9344				52.5942				126.821
		56.8921				52.5234				126.808
		56.8622				52.5204				126.773
		56.8489				52.5041				126.754
		56.8128				52.4984				126.712
		56.8112				52.4626				126.601
		56.7859				52.3786				126.585
		56.7541				52.369				126.581
		56.7452				52.3671				126.504
		56.7234				52.3473				126.401
		56.697				52.1908				126.38
		56.6587				52.0241				126.373
		56.5872				52.0102				126.304
		56.4362				51.9179				126.243
		56.4032				51.7885				126.196
		56.3993				51.7272				126.185
		56.3796				51.6571				126.18
		56.3441				51.5853				126.143
		56.2584				51.555				126.137
		56.235				51.5146				126.079
		56.2328				51.4789				125.992
		56.2312				51.4378				125.735
		56.1086				51.4136				125.699
		56.0748				51.3131				125.697
		56.0475				51.3107				125.57
		55.992				51.3089				125.545
		55.936				51.3019				125.465
		55.8379				51.2559				125.398
		55.8003				51.2359				125.268
		55.7826				51.122				125.263
		55.7806				51.1045				125.258
		55.7764				51.0462				125.083
		55.7747				50.7987				124.902
		55.6845				50.7766				124.857
		55.6064				50.7396				124.842
		55.5865				50.7195				124.75
		55.491				50.618				124.721
		55.4767				50.5821				124.46
		55.4413				50.5272				124.452
		55.4371				50.4432				124.413
		55.3762				50.3284				124.404
		55.3046				50.3005				124.371
		55.2704				50.2762				124.226
		55.1162				50.1978				124.215
[truncated: 1,312 more rows]
