# Supplementary material for: A microtranslatome coordinately regulates sodium and potassium currents in the human heart
Source: eLife. 2019 Oct 31;8:e52654. doi: 10.7554/eLife.52654 (PMC6867827; doi:10.7554/eLife.52654)
Supplement: Figure 2—source data 4. [file elife-52654-fig2-data4.xlsx]

## Sheet: Figure 2e
		X (Arbitrary value)	# SCN5A per cell	X (Arbitrary value)	# hERG1a per cell	X (Arbitrary value)	# gapdh per cell
		1	135	1.5	148	2	408
		1.02	153	1.52	131	2.02	90
		1.04	113	1.54	68	2.04	111
		1.06	118	1.56	80	2.06	289
		1.08	123	1.58	105	2.08	285
		1.1	138	1.5	133	2.1	92
		1	47	1.4	45	2	139
		0.92	54	1.42	81	1.9	175
		0.94	77	1.44	68	1.92	414
		0.96	44	1.46	39	1.94	351
		0.98	46	1.48	91	1.96	153
		0.9	65	1.5	20	1.98	141
		1	21	1.52	19	2	205
		1.02	21	1.54	19	2.02	110
		1.04	29	1.56	52	2.04	162
		1.06	24	1.58	37	2.06	496
		1.08	167	1.6	105	2.08	323
		1.1	87	1.5	69	2.1	202
		1	37	1.4	38	2	243
		0.92	30	1.42	20	1.9	144
		0.94	116	1.44	123	1.92	326
		0.96	33	1.46	116	1.94	121
		0.98	75	1.48	99	1.96	257
		0.9	112	1.5	148	1.98	91
		1	52	1.52	54	2	358
		1.02	39	1.54	96	2.02	199
		1.04	23	1.56	35	2.04	167
		1.06	33	1.58	28	2.06	561
		1.08	54	1.6	53	2.08	213
		1.1	150	1.5	99	2.1	300
		1	27	1.4	8	2	467
		0.92	68	1.42	28	1.9	373
		0.94	99	1.44	57	1.92	291
		0.96	140	1.46	95	1.94	188
		0.98	70	1.48	62	1.96	291
		0.9	85	1.5	54	1.98	212
		1	184	1.52	185	2	212
		0.92	102	1.54	123	2.02	169
		0.94	36	1.56	70	2.04	234
		0.96	36	1.58	70	2.06	53
		0.98	89	1.6	74	2.08	130
						2	121
						1.9	116
						1.92	272
						1.94	222
						1.96	295
						1.98	102
						2	59
						2.02	112
						2.04	150
	Mean	1	76.878	1.5	74.2683	2	223.9
	SD		46.1417		41.8468		117.44
	SEM		7.29565		6.61655		16.7772
