# Supplementary material for: A microtranslatome coordinately regulates sodium and potassium currents in the human heart
Source: eLife. 2019 Oct 31;8:e52654. doi: 10.7554/eLife.52654 (PMC6867827; doi:10.7554/eLife.52654)
Supplement: Figure 3—figure supplement 1—source data 1. [file elife-52654-fig3-figsupp1-data1.xlsx]

## Sheet: Figure 3 Supplement 1a
		# SCN5A mRNA	# GAPDH mRNA
		137	40
		12	80
		15	9
		29	111
		97	289
		33	285
		32	92
		8	139
		44	175
		133	414
		77	184
		105	49
		22	323
		119	202
		108	243
		82	144
		129	32
		43	121
		78	257
		23	91
		106	358
		93	19
		43	167
		167	561
		92	213
		113	300
		148	467
		54	75
		N=28	R=0,4808	R2=0,2312	pvalue=0,0096
		Spearman test	rho=0.36924	pvalue (2tailed)=0.05315

## Sheet: Figure 3 supplement 1b
		# GAPDH mRNA	# hERG1a mRNA
		169	121
		234	216
		53	40
		130	92
		121	43
		116	49
		272	62
		222	48
		295	110
		102	111
		59	45
		112	77
		150	106
		N=13	R=0,4197	R2=0,1761	pvalue=0,153373
		Spearman	Rs=0,48901	p(2-tailed)=0,08991
