# Supplementary material for: A microtranslatome coordinately regulates sodium and potassium currents in the human heart
Source: eLife. 2019 Oct 31;8:e52654. doi: 10.7554/eLife.52654 (PMC6867827; doi:10.7554/eLife.52654)
Supplement: Figure 3—source data 1. [file elife-52654-fig3-data1.xlsx]

## Sheet: Figure 3b
	# SCN5A mRNA	# hERG1a mRNA
	135	148
	153	131
	113	68
	118	80
	123	105
	138	133
	47	45
	54	81
	77	68
	44	39
	46	91
	65	20
	21	19
	21	19
	29	52
	24	37
	167	105
	87	69
	37	38
	30	20
	116	123
	33	116
	75	99
	112	148
	52	54
	39	96
	23	35
	33	28
	54	53
	150	99
	27	8
	68	28
	99	57
	140	95
	70	62
	85	54
	184	185
	102	123
	36	70
	36	70
	89	74
	N=41	R=0,7546	R2=0,56943	pvalue=0,00001
	Spearman	Rs=0,74492	p(2-tailed)=0
