# Supplementary material for: A microtranslatome coordinately regulates sodium and potassium currents in the human heart
Source: eLife. 2019 Oct 31;8:e52654. doi: 10.7554/eLife.52654 (PMC6867827; doi:10.7554/eLife.52654)
Supplement: Figure 3—source data 2. [file elife-52654-fig3-data2.xlsx]

## Sheet: Figure 3d
	# RyR2 mRNA	# hERG1a mRNA
	46	27
	73	66
	79	38
	116	72
	33	28
	24	32
	95	68
	104	79
	121	131
	114	145
	89	112
	34	47
	109	106
	131	79
	67	37
	98	51
	26	81
	23	81
	23	91
	24	68
	23	83
	19	61
	30	33
	42	44
	17	27
	115	48
	N=26	R=0,4654	R2=0,2166	pvalue=0,01658
	Spearman	Rs=0,32238	p(2-tailed)=0,1084
