# Supplementary material for: A microtranslatome coordinately regulates sodium and potassium currents in the human heart
Source: eLife. 2019 Oct 31;8:e52654. doi: 10.7554/eLife.52654 (PMC6867827; doi:10.7554/eLife.52654)
Supplement: Figure 4—source data 1. [file elife-52654-fig4-data1.xlsx]

## Sheet: Figure 4b
# SCN5A mRNA	# hERG1a mRNA	Area (pix2)		Mean size particle
135	148	1126.45		0.380216			4 pixels			3 pixels			2 pixels			1 pixel
153	131	1070.24					Exp by chance	Colocalized		Exp by chance	Colocalized		Exp by chance	Colocalized		Exp by chance	Colocalized
113	68	658.397				Mean	8.09886	16.6829		5.56052	13.3415		3.19492	11.122		0.402066	5.73171
118	80	556.269				SD	5.51927	10.7341		3.83212	8.74531		2.17729	7.22217		0.27709	5.20588
123	105	904.784				SEM	0.872673	1.69722		0.605912	1.38276		0.34426	1.27671		0.0438118	0.823122
138	133	1431.67
47	45	684.017					P value 0,00000000157			P value 0,00000000470			P value 0,000000000349			P value 0,0000000451
54	81	506.873						1.57e-09			4.7e-09			3.49e-10			4.51e-08
77	68	1130.64
44	39	330.684					Significance with Bonferroni correction : * P<0,00125 ; ** P<0,000122 ; *** P<0,0000244
46	91	1070.51
67	72	614.065
65	20	553.007					Exp. by chance	Colocalized		Exp. by chance	Colocalized		Exp. by chance	Colocalized		Exp. by chance	Colocalized
21	19	210.639					17.344	27		11.8541	25		6.84201	20		0.85714	10
29	52	975.155					17.3646	44		12.5161	36		6.85014	29		0.905002	19
24	37	841.066					11.4921	26		7.79986	21		4.5335	14		0.563987	9
167	105	2183					16.8514	21		11.3416	13		6.6477	7		0.820081	3
87	69	749.42					13.1764	29		9.53975	22		5.19794	16		0.689793	9
37	38	624.74					12.2525	39		8.56794	33		4.8335	26		0.619524	10
30	20	484.976					3.05954	12		2.06648	9		1.20696	7		0.149421	2
116	123	1150.69					8.7307	19		5.76723	13		3.44417	11		0.417013	4
33	116	588.445					4.26833	6		3.09502	5		1.68381	4		0.223793	3
75	99	538.244					4.82064	10		3.4681	7		1.90169	7		0.250769	4
112	148	958.353					3.66889	16		2.61333	16		1.44734	15		0.188963	9
52	54	367.355					7.45073	7		5.25026	9		2.93924	7		0.379632	3
39	96	685.98					2.13528	3		1.57109	5		0.842344	5		0.113601	2
23	35	350.522					1.72058	3		1.26596	2		0.678752	2		0.0915385	1
33	28	279.486					1.48103	5		1.03351	5		0.584252	5		0.0747304	4
54	53	428.263					1.10805	7		0.705619	7		0.437113	9		0.0510214	3
150	99	830.562					7.38353	15		5.36834	13		2.91273	13		0.38817	7
27	8	675.927					7.83097	18		5.35341	16		3.08924	13		0.387091	7
68	28	630.19					2.26812	10		1.50409	9		0.894751	10		0.108757	3
99	57	950.017					1.12376	3		0.826834	3		0.44331	3		0.0597861	2
140	95	1101.14					12.5313	24		8.28691	19		4.94348	13		0.599204	4
70	62	411.88					6.37508	13		4.34764	12		2.5149	11		0.314366	5
85	54	350.393					13.9056	26		9.21945	19		5.48561	16		0.666633	10
184	185	2142.3					16.4917	34		11.5596	27		6.5058	22		0.835841	7
102	123	1215.92					6.94308	12		5.10856	9		2.73897	5		0.369386	1
83	202	1590.99					5.50572	31		3.64764	30		2.17195	31		0.263751	22
36	70	575.763					2.08604	6		1.53486	6		0.82292	6		0.110981	3
89	74	668.117					3.00298	8		2.20953	5		1.18465	4		0.159765	1
							6.53253	7		4.46629	4		2.57702	5		0.322945	2
							16.5138	29		11.9493	9		6.51451	17		0.86402	21
							0.290265	1		0.213571	1		0.114507	1		0.0154427	0
							2.92594	9		2.01922	7		1.15425	5		0.146004	3
							5.39535	16		3.96978	14		2.12841	10		0.287044	7
							12.4971	21		8.07227	18		4.92999	18		0.583683	3
							10.698	18		7.04217	15		4.22024	10		0.5092	6
							14.3328	16		8.75477	7		5.65416	5		0.633034	0
							15.5487	32		10.6193	25		6.13382	17		0.767853	10
							9.96159	14		6.89584	11		3.92975	9		0.49862	4
							10.4821	10		7.04287	15		4.13506	12		0.509251	3
							4.2611	10		2.92512	5		1.68096	3		0.211508	1
							10.2413	27		6.58805	20		4.0401	13		0.476364	8
