# Supplementary material for: A microtranslatome coordinately regulates sodium and potassium currents in the human heart
Source: eLife. 2019 Oct 31;8:e52654. doi: 10.7554/eLife.52654 (PMC6867827; doi:10.7554/eLife.52654)
Supplement: Figure 4—source data 2. [file elife-52654-fig4-data2.xlsx]

## Sheet: Figure 4c
		SCN5A	hERG1a	Colocalized	Single SCN5A	Single hERG1a
		135	148	27	108	121
		153	131	44	109	87
		113	68	26	87	42
		118	80	21	97	59
		123	105	29	94	76
		138	133	39	99	94
		47	45	12	35	33
		54	81	19	35	62
		77	68	6	71	62
		44	39	10	34	29
		46	91	16	30	75
		65	20	7	58	13
		21	19	3	18	16
		21	19	3	18	16
		29	52	5	24	47
		24	37	7	17	30
		167	105	15	152	90
		87	69	18	69	51
		37	38	10	27	28
		30	20	3	27	17
		116	123	24	92	99
		33	116	13	20	103
		75	99	26	49	73
		112	148	34	78	114
		52	54	12	40	42
		39	96	31	8	65
		23	35	6	17	29
		33	28	8	25	20
		54	53	7	47	46
		150	99	29	121	70
		27	8	1	26	7
		68	28	9	59	19
		99	57	16	83	41
		140	95	21	119	74
		70	62	18	52	44
		85	54	16	69	38
		184	185	32	152	153
		102	123	14	88	109
		36	70	10	26	60
		36	70	10	26	60
		89	74	27	62	47
	Mean #	76.878	74.2683	16.6829	60.1951	57.5854
	SD #	46.1417	41.8468	10.7341	38.6777	33.7424
	SEM #	7.29565	6.61655	1.69722	6.11547	5.33514
