# Supplementary material for: A microtranslatome coordinately regulates sodium and potassium currents in the human heart
Source: eLife. 2019 Oct 31;8:e52654. doi: 10.7554/eLife.52654 (PMC6867827; doi:10.7554/eLife.52654)
Supplement: Figure 4—source data 3. [file elife-52654-fig4-data3.xlsx]

## Sheet: Figure 4e
# RyR2 mRNA	# hERG1a mRNA	Area (pix2)		Mean size particle
46	27	1160.77		0.380216			4 pixels			3 pixels			2 pixels			1 pixel
73	66	1608.34					Exp by chance	Colocalized		Exp by chance	Colocalized		Exp by chance	Colocalized		Exp by chance	Colocalized
79	38	693.88				Mean	4.919	5.92308		4.03104	4.96154		2.88409	3.69231		1.73715	2.03846
116	72	1172.85				SD	4.16836	2.26138		3.4159	1.88639		2.44398	1.64364		1.47206	1.53573
33	28	1232.14				SEM	0.659075	0.357556		0.540102	0.298264		0.386427	0.259882		0.232753	0.24282
24	32	3000.17
95	68	890.36					P value 0,16			P value 0,0162			P value 0,138			P value 0,36
104	79	1892.72
121	131	1769.46
114	145	1355.25					Significance with Bonferroni correction : * P<0,00197 ; ** P<0,000193 ; ***P<0,0000385
89	112	2110.88
34	47	1548.27
109	106	4400.55					Exp by chance	Colocalized		Exp by chance	Colocalized		Exp by chance	Colocalized		Exp by chance	Colocalized
131	79	1507.77					1.42256	3		1.16577	3		0.834073	1		0.502379	1
67	37	388.57					3.98276	3		3.26381	3		2.33516	2		1.40652	0
98	51	617.94					5.75204	6		4.7137	6		3.37252	5		2.03134	2
26	81	1214.05					9.46768	6		7.75861	9		5.55107	6		3.34352	4
23	81	987.48					0.997028	3		0.817049	3		0.584575	2		0.352101	1
23	91	1154.07					0.340338	2		0.278902	2		0.199546	2		0.120191	1
24	68	906.28					9.64634	6		7.90502	5		5.65582	2		3.40661	0
23	83	1071.3					5.77125	9		4.72944	8		3.38378	5		2.03812	1
19	61	809.81					11.91	9		9.76005	4		6.98304	3		4.20603	4
30	33	1372.43					16.2162	11		13.2889	6		9.50784	3		5.72677	5
42	44	1092.11					6.27827	7		5.14494	3		3.68106	3		2.21718	4
17	27	1149.72					1.37223	5		1.12452	4		0.80456	1		0.484603	1
115	48	1396.83					3.49077	5		2.86063	5		2.0467	4		1.23277	1
							9.12555	8		7.47824	3		5.35047	6		3.2227	3
							8.48209	6		6.95094	9		4.9732	7		2.99546	1
							10.7534	3		8.81223	5		6.3049	3		3.79757	3
							2.30631	8		1.88998	7		1.35223	5		0.814475	5
							2.5083	5		2.05551	4		1.47066	3		0.88581	2
							2.4112	6		1.97594	4		1.41373	3		0.851516	0
							2.39416	9		1.96198	6		1.40374	6		0.8455	2
							2.36914	5		1.94147	4		1.38907	2		0.836663	0
							1.90281	5		1.55932	5		1.11565	5		0.67198	2
							0.959048	7		0.785925	6		0.562307	5		0.338689	3
							2.24973	5		1.84362	4		1.31906	4		0.794496	3
							0.530782	4		0.434967	4		0.311207	4		0.187446	3
							5.25401	8		4.30558	7		3.08052	4		1.85546	1
