# Supplementary material for: A microtranslatome coordinately regulates sodium and potassium currents in the human heart
Source: eLife. 2019 Oct 31;8:e52654. doi: 10.7554/eLife.52654 (PMC6867827; doi:10.7554/eLife.52654)
Supplement: Figure 5—figure supplement 1—source data 1. [file elife-52654-fig5-figsupp1-data1.xlsx]

## Sheet: Figure 5 supplement 1b
				Cell 1	Cell 2	Cell 3	Cell 4	Cell 5	Cell 6	Cell 7	Cell 8	Cell 9	Cell 10	Cell 11	Cell 12	Cell 13
		# 1a protein		395	320	243	152	200	277	341	369	982	407	348	538	940
		# 1a mRNA		153	151	95	93	95	158	86	102	91	91	85	169	284
		# coloc 1a portein - 1a mRNA		41	35	24	17	15	23	14	14	10	10	6	17	40
																		Mean	SD	SEM
		% 1a mRNA associated with 1a prot		26.7974	23.1788	25.2632	18.2796	15.7895	14.557	16.2791	13.7255	10.989	10.989	7.05882	10.0592	14.0845		15.927	4.64049	1.3396
																		% single 1a mRNA		84.073
