# Supplementary material for: A microtranslatome coordinately regulates sodium and potassium currents in the human heart
Source: eLife. 2019 Oct 31;8:e52654. doi: 10.7554/eLife.52654 (PMC6867827; doi:10.7554/eLife.52654)
Supplement: Figure 5—source data 1. [file elife-52654-fig5-data1.xlsx]

## Sheet: Figure 5b
			observed triple association	Association by chance
		Cell 1	16	2.51716
		Cell 2	18	2.74616
		Cell 3	14	2.18999
		Cell 4	8	2.95943
		Cell 5	3	2.24009
		Cell 6	13	1.30535
		Cell 7	8	0.570932
		Cell 8	11	0.536151
		Cell 9	6	0.962852
		Cell 10	6	2.15751
		Cell 11	0	1.51159
		Cell 12	4	2.03132
		Cell 13	7	2.67793
		Mean	8.76923	1.87742
		SD	4.33136	0.692342
		SEM	1.25036	0.199862
			P=0,00047
		Bonferroni	P=0,0038	0.05
			P=0,00038	0.005
			P=0,000077	0.001
