# Supplementary material for: A microtranslatome coordinately regulates sodium and potassium currents in the human heart
Source: eLife. 2019 Oct 31;8:e52654. doi: 10.7554/eLife.52654 (PMC6867827; doi:10.7554/eLife.52654)
Supplement: Figure 5—source data 3. [file elife-52654-fig5-data3.xlsx]

## Sheet: Figure 5d
Distance from the nucleus mRNAs coloc (um)	Distance from the nucleus triple coloc (um)	Distance from nucleus intervals (um)	freq triple coloc	freq SCN5A - hERG1a mRNAs coloc
0.814198	2.1588	0	0	0
1.70535	2.52704	1	0	1
1.90554	3.00809	2	0	2
2.16299	3.28045	3	2	2
2.29525	3.71001	4	8	13
3.2559	3.72927	5	9	27
3.35836	3.75438	6	8	24
3.37175	3.85728	7	14	35
3.43213	3.89473	8	12	17
3.48594	3.97173	9	11	17
3.64286	4.05409	10	3	14
3.77853	4.07039	11	6	6
3.82607	4.21973	12	1	12
3.82763	4.57207	13	1	9
3.843	4.57929	14	5	11
3.88087	4.58932	15	4	10
3.89522	4.67816	16	1	1
3.89842	4.74996	17	7	7
4.02125	4.90914	18	3	4
4.05387	5.03069	19	2	7
4.10031	5.11353	20	4	5
4.12276	5.14478	21	5	9
4.22765	5.60747	22	0	1
4.25829	5.63903	23	2	6
4.38196	5.74537	24	1	8
4.42491	5.93806	25	0	0
4.43374	5.997	26	3	5
4.43645	6.21881	27	1	3
4.44297	6.26026	28	0	1
4.47918	6.32538	29	0	2
4.49521	6.41312	30	1	1
4.50379	6.4369	31	0	1
4.55713	6.58986	32	1	2
4.55976	6.59975	33	0	0
4.56188	6.69476	34	0	0
4.63672	6.74066	35	0	1
4.64536	6.75237	36	0	1
4.67574	6.81288	37	0	0
4.67684	6.83608	38	0	0
4.68282	6.84517	39	0	0
4.82438	6.92977	40	0	0
4.83538	7.05796	41	0	0
4.85467	7.07462	42	0	0
4.87387	7.10966	43	0	1
4.90266	7.18308
5.03149	7.20587
5.08759	7.22697		115	266
5.10501	7.32234
5.18526	7.43591
5.28109	7.47859
5.34019	7.63885
5.35769	7.77596
5.35772	7.96791
5.37368	8.04873
5.39867	8.28471
5.47895	8.28838
5.51042	8.33341
5.57108	8.35601
5.58788	8.38425
5.6374	8.62917
5.67578	8.65216
5.69873	8.80621
5.72668	8.87335
5.76585	8.97109
5.82216	9.01003
5.83418	9.4562
5.86527	9.63574
5.90035	10.2847
5.97077	10.4435
6.07388	10.5255
6.10244	10.5425
6.15535	10.6294
6.16153	10.7736
6.17419	11.1441
6.24021	12.1699
6.27227	13.1638
6.27569	13.2249
6.28607	13.235
6.29191	13.8216
6.29219	13.9692
6.31671	14.7431
6.32585	14.7681
6.32874	14.9211
6.43343	14.9845
6.45285	15.963
6.4669	16.0228
6.4908	16.1307
6.52684	16.1514
6.54392	16.3497
6.59522	16.5305
6.61278	16.5842
6.63225	16.9869
6.64326	17.0505
6.64814	17.406
6.65292	17.4942
6.74787	18.0997
6.78179	18.475
6.8323	19.3685
6.83645	19.6356
6.84107	19.7364
6.85743	19.8442
6.90136	20.654
6.9244	20.8888
6.9583	20.9484
7.04096	20.9569
7.12248	20.9977
7.12627	22.3261
7.13611	22.4246
7.28432	23.4544
7.29865	25.2264
7.38003	25.5426
7.50344	25.6084
7.54506	26.6423
7.58133	29.3227
7.593	31.2014
7.70108
7.7273
7.73403
7.74724
7.78673
7.89845
8.01097
8.0478
8.16451
8.19039
8.19185
8.23334
8.3198
8.33728
8.37214
8.39699
8.49879
8.74126
8.78141
8.78198
8.79784
8.85492
8.88928
9.01464
9.0711
9.19296
9.1973
9.21204
9.23587
9.26083
9.27429
9.34239
9.40264
9.41075
9.58871
9.69743
9.69933
10.0337
10.4589
10.5312
10.574
10.6391
10.8287
11.0573
11.1338
11.1339
11.1402
11.2747
11.2858
11.3195
11.5175
11.5205
11.5747
11.7495
11.9423
12.0681
12.1396
12.5682
12.734
12.8306
12.8312
12.8732
12.8931
12.9619
13.1773
13.2598
13.3016
13.3533
13.5349
13.6345
13.7521
13.8083
13.8168
13.8689
13.9659
14.2536
14.4034
14.4264
14.4341
14.5591
14.5608
14.6376
14.7586
14.8847
14.9369
15.1403
16.0741
16.0821
16.0897
16.1942
16.2214
16.4462
16.5009
17.299
17.3655
17.3854
17.4694
18.0701
18.083
18.1549
18.4328
18.5
18.5008
18.9159
19.3775
19.3835
19.3896
19.579
19.6998
20.0932
20.2564
20.4669
20.4779
20.6521
20.8704
20.935
20.9706
20.9869
21.7975
22.0246
22.1445
22.2998
22.3024
22.6739
22.7094
23.0439
23.0563
23.09
23.1749
23.272
23.3127
23.497
23.8468
25.1083
25.495
25.543
25.6277
25.7925
26.1441
26.1494
26.6279
27.1799
28.2684
28.8133
29.3155
30.9181
31.2537
31.4318
34.0158
35.6001
42.0425
