# Supplementary material for: A microtranslatome coordinately regulates sodium and potassium currents in the human heart
Source: eLife. 2019 Oct 31;8:e52654. doi: 10.7554/eLife.52654 (PMC6867827; doi:10.7554/eLife.52654)
Supplement: Figure 6—source data 1. [file elife-52654-fig6-data1.xlsx]

## Sheet: Figure 6b
		CTRL			CTRL			Puro			Puro
		SCN5A mRNA			hERG1a mRNA			SCN5A mRNA			hERG1a mRNA
		File	# mRNA		File	# mRNA		File	# mRNA		File	# mRNA
		Cell1 Rep1	98		Cell1 Rep1	113		Cell1 Rep1	89		Cell1 Rep1	164
		Cell2 Rep1	69		Cell2 Rep1	64		Cell2 Rep1	121		Cell2 Rep1	186
		Cell3 Rep1	170		Cell3 Rep1	248		Cell3 Rep1	114		Cell3 Rep1	113
		Cell4 Rep1	59		Cell4 Rep1	188		Cell4 Rep1	68		Cell4 Rep1	141
		Cell5 Rep1	93		Cell5 Rep1	225		Cell5 Rep1	119		Cell5 Rep1	210
		Cell6 Rep1	88		Cell6 Rep1	246		Cell6 Rep1	42		Cell6 Rep1	141
		Cell7 Rep1	94		Cell7 Rep1	129		Cell7 Rep1	50		Cell7 Rep1	104
		Cell8 Rep1	70		Cell8 Rep1	179		Cell8 Rep1	55		Cell8 Rep1	133
		Cell9 Rep1	179		Cell9 Rep1	184		Cell9 Rep1	127		Cell9 Rep1	179
		Cell10 Rep1	136		Cell10 Rep1	125		Cell10 Rep1	52		Cell10 Rep1	73
		Cell11 Rep1	100		Cell11 Rep1	87		Cell11 Rep1	57		Cell11 Rep1	51
		Cell12 Rep1	149		Cell12 Rep1	108		Cell12 Rep1	116		Cell12 Rep1	76
		Cell13 Rep1	131		Cell13 Rep1	110		Cell13 Rep1	90		Cell13 Rep1	60
		Cell14 Rep1	116		Cell14 Rep1	151		Cell14 Rep1	101		Cell14 Rep1	65
		Cell1 Rep2	134		Cell1 Rep2	71		Cell15 Rep1	119		Cell15 Rep1	84
		Cell2 Rep2	91		Cell2 Rep2	35		Cell16 Rep1	72		Cell16 Rep1	79
		Cell3 Rep2	115		Cell3 Rep2	73		Cell17 Rep1	66		Cell17 Rep1	51
		Cell4 Rep2	26		Cell4 Rep2	82		Cell1 Rep2	55		Cell1 Rep2	81
		Cell5 Rep2	74		Cell5 Rep2	89		Cell2 Rep2	169		Cell2 Rep2	118
		Cell6 Rep2	74		Cell6 Rep2	29		Cell3 Rep2	71		Cell3 Rep2	84
		Cell7 Rep2	83		Cell7 Rep2	29		Cell4 Rep2	121		Cell4 Rep2	92
		Cell8 Rep2	115		Cell8 Rep2	53		Cell5 Rep2	89		Cell5 Rep2	58
		Cell9 Rep2	35		Cell9 Rep2	145		Cell6 Rep2	44		Cell6 Rep2	34
		Cell10 Rep2	31		Cell10 Rep2	116		Cell7 Rep2	51		Cell7 Rep2	51
		Cell11 Rep2	26		Cell11 Rep2	50		Cell8 Rep2	90		Cell8 Rep2	54
		Cell12 Rep2	29		Cell12 Rep2	107		Cell9 Rep2	93		Cell9 Rep2	43
		Cell13 Rep2	60		Cell13 Rep2	94		Cell10 Rep2	35		Cell10 Rep2	20
		Cell14 Rep2	63		Cell14 Rep2	80		Cell11 Rep2	65		Cell11 Rep2	30
		Cell15 Rep2	58		Cell15 Rep2	68		Cell12 Rep2	26		Cell12 Rep2	13
		Cell16 Rep2	136		Cell16 Rep2	69		Cell13 Rep2	62		Cell13 Rep2	75
		Cell17 Rep2	96		Cell17 Rep2	14
		Cell18 Rep2	89		Cell18 Rep2	26
		Cell19 Rep2	90		Cell19 Rep2	70
		Mean	90.2121		Mean	104.758		Mean	80.9667		Mean	88.7667
		SD	40.0162		SD	62.3894		SD	33.7071		SD	50.7521
		SEM	6.96593		SEM	10.8606		SEM	6.15405		SEM	9.26602
