# Supplementary material for: A microtranslatome coordinately regulates sodium and potassium currents in the human heart
Source: eLife. 2019 Oct 31;8:e52654. doi: 10.7554/eLife.52654 (PMC6867827; doi:10.7554/eLife.52654)
Supplement: Figure 6—source data 2. [file elife-52654-fig6-data2.xlsx]

## Sheet: Figure 6c
	Ribosomal subunit S6										hERG1a protein
	Control					Puro					Control					Puro
	S6 prot	hERG1a mRNA	Coloc			S6 prot	hERG1a mRNA	Coloc			hERG1a prot	hERG1a mRNA	Coloc			hERG1a prot	hERG1a mRNA	Coloc
	2194	151	53			220	81	14			1125	58	22			1253	164	13
	1509	71	25			811	117	11			294	31	6			265	186	7
	1489	35	19			866	84	14			652	79	13			234	113	2
	1558	73	18			2251	92	11			502	85	14			346	141	11
	738	82	21			2129	58	13			676	104	24			1285	210	17
	1772	89	37			205	34	11			660	65	15			263	141	12
	1828	29	10			392	51	10			459	99	19			214	104	5
	1827	29	13			1552	54	11			198	59	24			869	133	10
	1929	53	24			1521	43	13			1612	84	46			801	179	16
	2882	145	59			605	20	5			859	105	16			625	66	10
	1970	116	47			1479	30	12			752	87	26			1259	99	14
	1652	50	17			962	13	6			1017	88	20			1413	51	13
	1853	107	48			1339	92	15			1217	90	21			677	60	8
	702	94	30			1339	92	12								630	76	10
	599	80	18													896	65	8
	949	68	16													462	79	7
	2945	69	29													665	84	9
	1549	14	2													517	51	8
	1624	26	12
	1120	70	20
Mean #	1634.45	72.55	25.9		Mean #	1119.36	61.5	11.2857		Mean #	771	79.5385	20.4615		Mean #	704.111	111.222	10
Mean % mRNA			35.7		Mean % mRNA			18.35		Mean % mRNA			25.73		Mean % mRNA			8.99
SD	626.511	37.7561	15.4064		SD	650.258	31.746	2.84006		SD	393.828	21.1448	9.43942		SD	391.605	49.8581	3.78853
SEM	140.092	8.44252	3.44498		SEM	173.789	8.48447	0.759038		SEM	109.228	5.86451	2.61802		SEM	92.3023	11.7517	0.892965
