# Supplementary material for: A microtranslatome coordinately regulates sodium and potassium currents in the human heart
Source: eLife. 2019 Oct 31;8:e52654. doi: 10.7554/eLife.52654 (PMC6867827; doi:10.7554/eLife.52654)
Supplement: Figure 6—source data 3. [file elife-52654-fig6-data3.xlsx]

## Sheet: Figure 6d
	hERG1a protein												Ribosomal subunit S6
	CTRL						PURO						CTRL						PURO
		# 1a mRNA coloc with 1a prot	# triple coloc	% of translated mRNA triple coloc				# 1a mRNA coloc with 1a prot	# triple coloc	% of translated mRNA triple coloc				# 1a mRNA coloc with S6 prot	# triple coloc	% of translated mRNA triple coloc				# 1a mRNA coloc with S6 prot	# triple coloc	% of translated mRNA triple coloc
	Im3 Cell1	21	0	0			Im1 Cell1	16	0	0			Im1 Cell1	15	11	73.3333			Im1 Cell1	8	2	25
	Im3 Cell2	10	4	40			Im1 Cell2	18	1	5.55556			Im1 Cell2	10	5	50			Im1 Cell2	10	4	40
	Im4 Cell1	36	0	0			Im1 Cell3	14	0	0			Im1 Cell3	5	5	100			Im2 Cell1	9	4	44.4444
	Im4 Cell2	13	4	30.7692			Im1 Cell4	11	1	9.09091			Im1 Cell4	6	4	66.6667			Im2 Cell2	16	7	43.75
	Im4 Cell3	19	0	0			Im2 Cell1	21	4	19.0476			Im1 Cell5	4	3	75			Im2 Cell3	12	6	50
	Im4 Cell4	15	5	33.3333			Im2 Cell2	10	2	20			Im2 Cell1	12	6	50			Im3 Cell1	4	1	25
	Im5 Cell1	7	3	42.8571			Im2 Cell3	4	0	0			Im2 Cell2	10	5	50			Im3 Cell2	5	1	20
	Im5 Cell2	15	5	33.3333			Im2 Cell4	10	5	50			Im2 Cell3	3	2	66.6667			Im4 Cell1	12	6	50
	Im6 Cell1	19	9	47.3684			Im2 Cell5	27	4	14.8148			Im2 Cell4	7	5	71.4286			Im4 Cell2	9	4	44.4444
	Im6 Cell2	10	3	30			Im3 Cell1	11	0	0			Im3 Cell1	11	8	72.7273			Im4 Cell3	2	0	0
	Im6 Cell3	14	6	42.8571			Im3 Cell2	13	0	0			Im3 Cell2	11	5	45.4545			Im4 Cell4	6	2	33.3333
	Im6 Cell4	10	4	40			Im4 Cell1	7	3	42.8571			Im3 Cell3	3	2	66.6667			Im4 Cell5	3	2	66.6667
	Im6 Cell5	16	6	37.5			Im4 Cell2	12	1	8.33333			Im3 Cell4	13	9	69.2308			Im5 Cell1	5	1	20
							Im6 Cell1	9	1	11.1111			Im4 Cell1	11	5	45.4545
							Im6 Cell3	11	1	9.09091			Im4 Cell2	6	3	50
							Im6 Cell2	7	0	0			Im4 Cell3	12	5	41.6667
													Im6 Cell1	18	12	66.6667
			Mean %	37.8019					Mean %	11.8688					Mean %	62.4096					Mean %	35.5876
			SD	17.3212					SD	16.5498					SD	15.0393					SD	17.335
			SEM	4.20101					SEM	4.59009					SEM	3.64758					SEM	4.80786
