# Supplementary material for: A microtranslatome coordinately regulates sodium and potassium currents in the human heart
Source: eLife. 2019 Oct 31;8:e52654. doi: 10.7554/eLife.52654 (PMC6867827; doi:10.7554/eLife.52654)
Supplement: Figure 7—figure supplement 1—source data 1. [file elife-52654-fig7-figsupp1-data1.xlsx]

## Sheet: Figure 7 supplement 1b
				Control shRNA	(n=24 cells)					hERG1b shRNA	(n=19 cells)
		Image #	Cell #	hERG1a mRNA	SCN5A mRNA			Image #	Cell #	hERG1a mRNA	SCN5A mRNA
	1	Img1.2	1	91	77		1	Img1.1	1	50	50
	2	Img1.3	1	71	24		2	Img1.2	1	32	36			Control shRNA vs. hERG1b shRNA
	3	Img1.4	1	79	109		3	Img1.6	1	72	56			hERG1a mRNA
	4	Img1.5	1	100	93		4	Img1.7	1	77	64		t-test statistic	9.86336e-05
	5	Img1.6	1	96	70		5	Img1.8	1	49	61
	6	Img2.1	1	96	81		6	Img2.1	1	73	41			Control shRNA vs. hERG1b shRNA
	7	Img2.2	1	34	23		7	Img2.4	1	74	53			SCN5A mRNA
	8	Img2.2	2	76	47		8	Img2.5	1	67	34		t-test statistic	0.00024387
	9	Img2.2	3	23	11		9	Img2.6	1	33	30
	10	Img2.2	4	89	89		10	Img2.7	1	51	76
	11	Img2.2	5	32	41		11	Img2.10	1	41	33
	12	Img2.2	6	22	29		12	Img2.11	1	42	27
	13	Img2.4	1	98	87		13	Img3.1	1	69	33
	14	Img2.6	1	102	63		14	Img3.1	2	10	8
	15	Img2.9	1	75	98		15	Img3.2	1	38	36
	16	Img2.11	1	106	97		16	Img4.1	1	41	58
	17	Img2.12	1	80	75		17	Img4.2	1	40	57
	18	Img2.212	2	59	76		18	Img5.1	1	44	37
	19	Img2.13	1	90	70		19	Img5.2	1	32	6
	20	Img3.2	1	99	74
	21	Img3.3	1	114	102
	22	Img3.4	1	68	63
	23	Img3.5	1	124	89
	24	Img3.8	1	94	96
			Mean	79.9167	70.1667				Mean	49.2105	41.8947
			SD	28.0433	27.5644				SD	18.2592	18.2693
			SEM	5.72432	5.62656				SEM	4.18894	4.19126

## Sheet: Figure 7 supplement 1c
			Control shRNA (n=24 cells)						hERG1b shRNA (n=19 cells)
		Image #	Cell #	# of colocalization events				Image #	Cell #	# of colocalization events
	1	Img1.2	1	4			1	Img1.1	1	1
	2	Img1.3	1	4			2	Img1.2	1	2				Colocalization
	3	Img1.4	1	9			3	Img1.6	1	2				t-test statistic	0.000175347
	4	Img1.5	1	5			4	Img1.7	1	3
	5	Img1.6	1	11			5	Img1.8	1	0
	6	Img2.1	1	9			6	Img2.1	1	6
	7	Img2.2	1	2			7	Img2.4	1	6
	8	Img2.2	2	12			8	Img2.5	1	9
	9	Img2.2	3	5			9	Img2.6	1	2
	10	Img2.2	4	15			10	Img2.7	1	0
	11	Img2.2	5	5			11	Img2.10	1	3
	12	Img2.2	6	5			12	Img2.11	1	2
	13	Img2.4	1	7			13	Img3.1	1	7
	14	Img2.6	1	9			14	Img3.1	2	2
	15	Img2.9	1	4			15	Img3.2	1	6
	16	Img2.11	1	5			16	Img4.1	1	2
	17	Img2.12	1	7			17	Img4.2	1	4
	18	Img2.212	2	9			18	Img5.1	1	2
	19	Img2.13	1	6			19	Img5.2	1	1
	20	Img3.2	1	4
	21	Img3.3	1	10
	22	Img3.4	1	8
	23	Img3.5	1	4
	24	Img3.8	1	3
			Mean	6.75					Mean	3.15789
			SD	3.20665					SD	2.50029
			SEM	0.654555					SEM	0.573606
