# Supplementary material for: A microtranslatome coordinately regulates sodium and potassium currents in the human heart
Source: eLife. 2019 Oct 31;8:e52654. doi: 10.7554/eLife.52654 (PMC6867827; doi:10.7554/eLife.52654)
Supplement: Figure 7—source data 1. [file elife-52654-fig7-data1.xlsx]

## Sheet: Figure 7a
	hERG1a primers			2^-dCt	dCt	ddCt	Fold	LoG(Fold)	exp average	Mean centered		expStDev	autoscaled				Avg	SEM	lower95%CI	upper95%CI		linAvg	lin loCI	lin upCI		recalAvg	recal low CI	recal up CI		lower CI	upper CI
		shRNA scramble	exp1	0.115867	3.10945	0	1	0	-0.225654	0.225654	exp1	0.201415	1.12034	0.181404		shRNA scramble	0.185556	0.00159804	0.17868	0.192432		1.53305	1.50897	1.55751		1	0.984293	1.01596		0.0157075	0.0159581
			exp2	0.183644	2.44502	-0.664439	1.58495	0.200016		0.16132			1.1547	0.186967		shRNA hERG1a	-0.104223	0.00993385	-0.146965	-0.0614814		0.786641	0.71291	0.867998		0.513122	0.465028	0.56619		0.0480944	0.0530685
			exp3	0.0183133	5.77097	2.66151	0.158054	-0.801195		0.125686			1.15458	0.186948		shRNA hERG1b	-0.0813327	0.0115264	-0.130927	-0.0317387		0.829215	0.73973	0.929525		0.540893	0.482522	0.606325		0.0583707	0.0654318
			exp4	0.0599433	4.06026	0.950803	0.517344	-0.28622		0.228199			1.15431	0.186904
		shRNA hERG1a	exp1	0.0475021	4.39587	1.28641	0.409969	-0.387249	0.0386958	-0.161594	exp2	0.139707	-0.802294	-0.129906
			exp2	0.105188	3.24896	0.139506	0.90783	-0.0419954		-0.0806912			-0.577573	-0.0935198
			exp3	0.0118216	6.40243	3.29298	0.102027	-0.991285		-0.0644035			-0.591628	-0.0957955
			exp4	0.0269333	5.21446	2.10501	0.23245	-0.633671		-0.119252			-0.603215	-0.0976717
		shRNA hERG1b	exp1	0.059463	4.07186	0.96241	0.513199	-0.289714	-0.926881	-0.0640599	exp3	0.108858	-0.318049	-0.051498
			exp2	0.105203	3.24875	0.139299	0.90796	-0.0419331		-0.0806289			-0.577127	-0.0934476
			exp3	0.0119069	6.39206	3.28261	0.102763	-0.988163		-0.0612822			-0.562954	-0.0911527
			exp4	0.02758	5.18023	2.07078	0.238031	-0.623367		-0.108947			-0.551093	-0.0892322
									-0.514419		exp4	0.197693
	hERG1b primers			2^-dCt	dCt	ddCt	Fold	LoG(Fold)	exp average	Mean centered		expStDev	autoscaled				Avg	SEM	lower95%CI	upper95%CI		linAvg	lin loCI	lin upCI		recalAvg	recal low CI	recal up CI		lower CI	upper CI
		shRNA scramble	exp1	0.0154192	6.01913	0	1	0	-0.152238	0.152238	exp1	0.137056	1.11078	0.161637		shRNA scramble	0.163357	0.00233392	0.153315	0.173399		1.45665	1.42336	1.49073		1	0.977143	1.02339		0.0228574	0.0233921
			exp2	0.0951207	3.3941	-2.62503	6.16897	0.790213		0.17323			1.14796	0.167047		shRNA hERG1a	-0.105025	0.0154108	-0.171332	-0.0387177		0.78519	0.674012	0.914708		0.539037	0.462712	0.627951		0.0763245	0.0889142
			exp3	0.161477	2.6306	-3.38853	10.4725	1.02005		0.161509			1.08899	0.158466		shRNA hERG1b	-0.0583316	0.0174516	-0.13342	0.0167564		0.874316	0.735496	1.03934		0.600222	0.504921	0.713509		0.0953004	0.113288
			exp4	0.0780004	3.68037	-2.33875	5.05865	0.704035		0.166598			1.14267	0.166277
		shRNA hERG1a	exp1	0.0083611	6.90209	0.882964	0.542252	-0.265799	0.616983	-0.11356	exp2	0.150903	-0.82857	-0.120571
			exp2	0.0542896	4.20318	-1.81595	3.5209	0.546654		-0.0703292			-0.466057	-0.067819
			exp3	0.0825146	3.59921	-2.41992	5.35142	0.728469		-0.130072			-0.877025	-0.127622
			exp4	0.0418032	4.58024	-1.43888	2.71111	0.433147		-0.10429			-0.715306	-0.104089
		shRNA hERG1b	exp1	0.00993449	6.65334	0.634212	0.644293	-0.190917	0.858541	-0.0386783	exp3	0.148311	-0.282208	-0.041066
			exp2	0.0503669	4.31138	-1.70775	3.2665	0.514083		-0.1029			-0.681899	-0.0992276
			exp3	0.103554	3.27155	-2.74758	6.7159	0.827104		-0.0314365			-0.211964	-0.0308443
			exp4	0.0460458	4.44079	-1.57834	2.98626	0.475128		-0.0623086			-0.427365	-0.0621886
									0.537437		exp4	0.145797
	SCN5A primers			2^-dCt	dCt	ddCt	Fold	LoG(Fold)	exp average	Mean centered		expStDev	autoscaled				Avg	SEM	lower95%CI	upper95%CI		linAvg	lin loCI	lin upCI		recalAvg	recal low CI	recal up CI		lower CI	upper CI
		shRNA scramble	exp1	0.0773187	3.69304	0	1	0	-0.156688	0.156688	exp1	0.151216	1.03618	0.153292		shRNA scramble	0.158992	0.0030097	0.146042	0.171942		1.44209	1.39972	1.48574		1	0.970622	1.03027		0.0293776	0.0302667
			exp2	0.0231451	5.43315	1.74011	0.299347	-0.523825		0.166238			1.1053	0.163517		shRNA hERG1a	-0.0891496	0.0389465	-0.256723	0.0784238		0.814424	0.553703	1.19791		0.564753	0.383959	0.830676		0.180794	0.265923
			exp3	0.109182	3.19519	-0.497847	1.4121	0.149867		0.153954			1.08266	0.160167		shRNA hERG1b	-0.0698424	0.0361671	-0.225457	0.0857721		0.851447	0.595036	1.21835		0.590426	0.412621	0.844851		0.177805	0.254425
		shRNA hERG1a	exp1	0.052479	4.25212	0.559078	0.678736	-0.168299	-0.690063	-0.0116117	exp2	0.150401	-0.0767887	-0.0113601
			exp2	0.0117918	6.40607	2.71303	0.152509	-0.816704		-0.126641			-0.842023	-0.124568
			exp3	0.0572505	4.12657	0.433528	0.740449	-0.130505		-0.126418			-0.889019	-0.131521
		shRNA hERG1b	exp1	0.0385941	4.69547	1.00244	0.499156	-0.301763	-0.00408674	-0.145076	exp3	0.1422	-0.959392	-0.141932
			exp2	0.0144087	6.11692	2.42388	0.186355	-0.72966		-0.0395969			-0.263275	-0.0389487
			exp3	0.071889	3.79809	0.105046	0.929775	-0.0316221		-0.0275354			-0.193639	-0.0286468
	RYR2 primers			2^-dCt	dCt	ddCt	Fold	LoG(Fold)	exp average	Mean centered		expStDev	autoscaled				Avg	SEM	lower95%CI	upper95%CI		linAvg	lin loCI	lin upCI		recalAvg	recal loCI	recal upCI		lower CI	upper CI
		shRNA scramble	exp1	0.0574203	4.12229	0	1	0	-0.0363753	0.0363753	exp1	0.0315514	1.15289	0.0246622		shRNA scramble	0.00457046	0.0148942	-0.0595141	0.068655		1.01058	0.871939	1.17126		1	0.862811	1.159		0.137189	0.159003
			exp2	0.064261	3.95991	-0.162381	1.11913	0.0488817		0.00757263			0.634389	0.0135706		shRNA hERG1a	-0.00950048	0.0101173	-0.0530318	0.0340308		0.978362	0.885051	1.08151		0.96812	0.875786	1.07019		0.0923342	0.102069
			exp3	0.0405012	4.62589	0.503597	0.705346	-0.151598		-0.0237133			-1.14631	-0.0245215		shRNA hERG1b	0.00493002	0.00810428	-0.0299399	0.0397999		1.01142	0.933384	1.09597		1.00083	0.923612	1.0845		0.077216	0.0836715
		shRNA hERG1a	exp1	0.0504355	4.30942	0.187122	0.878356	-0.0563293	0.041309	-0.019954	exp2	0.0119369	-0.632426	-0.0135286
			exp2	0.0611807	4.03078	-0.0915149	1.06549	0.0275487		-0.0137603			-1.15276	-0.0246594
			exp3	0.0437067	4.516	0.393706	0.761172	-0.118517		0.00936732			0.45282	0.00968656
		shRNA hERG1b	exp1	0.0508474	4.29768	0.175387	0.88553	-0.0527967	-0.127885	-0.0164214	exp3	0.0206866	-0.520464	-0.0111336
			exp2	0.0640564	3.96451	-0.157781	1.11557	0.0474967		0.0061877			0.518367	0.0110887
			exp3	0.0442107	4.49946	0.377167	0.769948	-0.113539		0.014346			0.69349	0.0148349
