# Supplementary material for: A microtranslatome coordinately regulates sodium and potassium currents in the human heart
Source: eLife. 2019 Oct 31;8:e52654. doi: 10.7554/eLife.52654 (PMC6867827; doi:10.7554/eLife.52654)
Supplement: Figure 7—source data 2. [file elife-52654-fig7-data2.xlsx]

## Sheet: Figure 7b
hERG1a primers			2^-dCt	dCt	ddCt	Fold	LoG(Fold)	exp average	Mean centered		expStDev	autoscaled				Avg	SEM	lower95%CI	upper95%CI		linAvg	lin loCI	lin upCI		recalAvg	recal loCI	recal upCI		lower CI	upper CI
	shRNA scramble	exp1	7.5207	-2.91087	0	1	0	-0.130236	0.130236	exp1	0.209816	0.620717	0.130942		shRNA scramble	0.142764	0.00694649	0.112876	0.172652		1.3892	1.29681	1.48817		1	0.933494	1.07124		0.0665057	0.0712439
		exp2	8.9408	-3.1604	-0.249538	1.18883	0.0751183		0.164269			0.754107	0.159082		shRNA hERG1a	-0.241669	0.000815946	-0.24518	-0.238158		0.573233	0.568618	0.577886		0.412636	0.409314	0.415985		0.0033222	0.00334917
		exp3	12.04	-3.58977	-0.6789	1.60092	0.204369		0.136556			0.702959	0.148292		shRNA hERG1b	0.0989048	0.00774062	0.0655996	0.13221		1.25575	1.16305	1.35584		0.903942	0.837212	0.975991		0.0667302	0.0720489
		exp4	11.2502	-3.49187	-0.581008	1.49589	0.174901		0.129497			0.579693	0.122288
		exp5	15.8736	-3.98855	-1.07769	2.11065	0.324416	-0.089151	0.152141	exp2	0.217833	0.726302	0.153216
	shRNA hERG1a	exp1	3.1914	-1.67419	1.23668	0.424349	-0.372277		-0.242041			-1.15359	-0.243353
		exp2	3.46744	-1.79387	1.11699	0.461053	-0.336249		-0.247098			-1.13435	-0.239295
		exp3	5.26843	-2.39737	0.513493	0.700524	-0.154577		-0.222391			-1.14482	-0.241504
		exp4	4.61016	-2.20482	0.70605	0.612996	-0.212542	0.0678137	-0.257946	exp3	0.194258	-1.1547	-0.243588
		exp5	6.45086	-2.68949	0.221375	0.857747	-0.0666406		-0.238916			-1.14056	-0.240605
	shRNA hERG1b	exp1	7.20819	-2.84964	0.0612288	0.958447	-0.0184317		0.111805			0.53287	0.112411
		exp2	7.412	-2.88986	0.0210031	0.985547	-0.00632257		0.0828284			0.380239	0.0802128
		exp3	10.7129	-3.42128	-0.51041	1.42445	0.153649	0.045404	0.0858349	exp4	0.223389	0.441859	0.0932119
		exp4	11.2231	-3.4884	-0.577529	1.49229	0.173854		0.12845			0.575005	0.121299
		exp5	13.6556	-3.77142	-0.86055	1.81573	0.259051		0.0867757			0.414258	0.0873892
								0.172276		exp5	0.209473
hERG1b primers			2^-dCt	dCt	ddCt	Fold	LoG(Fold)	exp average	Mean centered		expStDev	autoscaled				Avg	SEM	lower95%CI	upper95%CI		linAvg	lin loCI	lin upCI		recalAvg	recal loCI	recal upCI		lower CI	upper CI
	shRNA scramble	exp1	2.52767	-1.33781	0	1	0	-0.121498	0.121498	exp1	0.156898	0.774375	0.126821		shRNA scramble	0.124688	0.00835565	0.0887364	0.160639		1.33256	1.22669	1.44757		1	0.920552	1.0863		0.0794476	0.0863042
		exp2	8.34328	-3.06061	-1.72281	3.30078	0.518616		0.137037			0.847174	0.138743		shRNA hERG1a	0.0599693	0.0102259	0.0159708	0.103968		1.14807	1.03746	1.27048		0.861552	0.778543	0.95341		0.0830083	0.0918586
		exp3	86.2416	-6.43031	-5.0925	34.119	1.533		0.112669			0.637743	0.104444		shRNA hERG1b	-0.184657	0.00191284	-0.192887	-0.176427		0.653646	0.641376	0.666152		0.490518	0.48131	0.499902		0.00920827	0.00938444
		exp4	4.61336	-2.20582	-0.868009	1.82514	0.261297		0.125591			0.786117	0.128744
	shRNA hERG1a	exp1	2.172	-1.11902	0.218786	0.859288	-0.0658612	0.381579	0.055637	exp2	0.161758	0.354606	0.0580743
		exp2	6.69415	-2.7429	-1.40509	2.64835	0.422975		0.0413962			0.255914	0.0419115
		exp3	82.0336	-6.35814	-5.02033	32.4542	1.51127		0.0909444			0.514773	0.0843051
		exp4	3.91428	-1.96875	-0.630937	1.54857	0.189931		0.0542249			0.339413	0.0555862
	shRNA hERG1b	exp1	1.27083	-0.34577	0.992039	0.502767	-0.298633	1.42033	-0.177135	exp3	0.176669	-1.12898	-0.184895
		exp2	4.03521	-2.01264	-0.674834	1.59641	0.203145		-0.178434			-1.10309	-0.180655
		exp3	41.6326	-5.37964	-4.04183	16.4707	1.21671		-0.203614			-1.15252	-0.188749
		exp4	2.28355	-1.19128	0.146529	0.903421	-0.0441098		-0.179816			-1.12553	-0.18433
								0.135706		exp4	0.159761
SCN5A primers			2^-dCt	dCt	ddCt	Fold	LoG(Fold)	exp average	Mean centered		expStDev	autoscaled				Avg	SEM	lower95%CI	upper95%CI		linAvg	lin loCI	lin upCI		recalAvg	recal loCI	recal upCI		lower CI	upper CI
	shRNA scramble	exp1	41.764	-5.38419	0	1	0	-0.0101634	0.0101634	exp1	0.0140675	0.722478	0.0139668		shRNA scramble	0.0170137	0.00212349	0.00787704	0.0261503		1.03995	1.0183	1.06206		1	0.979182	1.02126		0.0208181	0.0212607
		exp2	16.9108	-4.07987	1.30432	0.404912	-0.392639		0.0170088			0.826358	0.0159749		shRNA hERG1a	-0.00108297	0.00792403	-0.0351773	0.0330114		0.997509	0.922195	1.07897		0.959187	0.886766	1.03752		0.0724212	0.0783358
		exp3	17.0207	-4.08922	1.29497	0.407544	-0.389825		0.0254795			1.09143	0.0210993		shRNA hERG1b	-0.0159307	0.00584842	-0.0410944	0.00923302		0.963983	0.909715	1.02149		0.926949	0.874766	0.982244		0.0521825	0.0552954
	shRNA hERG1a	exp1	41.3553	-5.37	0.0141895	0.990213	-0.00427146	-0.409648	0.00589199	exp2	0.0205828	0.418837	0.00809685
		exp2	16.4826	-4.04288	1.34131	0.394661	-0.403776		0.00587192			0.285283	0.00551501
		exp3	15.3157	-3.93694	1.44725	0.36672	-0.435666		-0.020361			-0.872181	-0.0168608
	shRNA hERG1b	exp1	39.3173	-5.29709	0.0870973	0.941415	-0.0262189	-0.415305	-0.0160554	exp3	0.0233449	-1.14132	-0.0220636
		exp2	15.4267	-3.94736	1.43683	0.369379	-0.432528		-0.0228807			-1.11164	-0.0214899
		exp3	15.8628	-3.98757	1.39662	0.379819	-0.420423		-0.00511846			-0.219254	-0.00423855
RYR2 primers			2^-dCt	dCt	ddCt	Fold	LoG(Fold)	exp average	Mean centered		expStDev	autoscaled				Avg	SEM	lower95%CI	upper95%CI		linAvg	lin loCI	lin upCI		recalAvg	recal loCI	recal upCI		lower CI	upper CI
	shRNA scramble	exp1	4.3978	-2.13678	0	1	0	-0.0179464	0.0179464	exp1	0.0155496	1.15413	0.0152637		shRNA scramble	0.00732259	0.00793771	-0.0268306	0.0414758		1.017	0.94009	1.10021		1	0.924372	1.08182		0.0756279	0.0818155
		exp2	6.5835	-2.71885	-0.582072	1.497	0.175221		-0.00801565			-0.646703	-0.00855282		shRNA hERG1a	-0.00764269	0.000483411	-0.00972264	-0.00556274		0.982556	0.977862	0.987273		0.966128	0.961512	0.970766		0.00461597	0.00463813
		exp3	21.7047	-4.43994	-2.30316	4.93536	0.693319		0.0135337			1.15361	0.0152569		shRNA hERG1b	0.000320097	0.00745655	-0.0317629	0.0324031		1.00074	0.929474	1.07746		0.984005	0.913933	1.05945		0.070072	0.0754445
	shRNA hERG1a	exp1	4.12885	-2.04574	0.0910418	0.938845	-0.0274063	0.183237	-0.00945995	exp2	0.0123946	-0.608371	-0.00804587
		exp2	6.61016	-2.72468	-0.587902	1.50306	0.176976		-0.00626054			-0.5051	-0.00668009
		exp3	20.6893	-4.37081	-2.23403	4.70446	0.67251		-0.00727572			-0.620185	-0.00820211
	shRNA hERG1b	exp1	4.13812	-2.04897	0.0878078	0.940951	-0.0264328	0.679785	-0.00848642	exp3	0.0117315	-0.545763	-0.00721787
		exp2	6.93024	-2.79291	-0.656124	1.57584	0.197513		0.0142762			1.1518	0.0152329
		exp3	20.7378	-4.37419	-2.23741	4.7155	0.673527		-0.00625794			-0.533429	-0.00705474
