# Supplementary material for: A microtranslatome coordinately regulates sodium and potassium currents in the human heart
Source: eLife. 2019 Oct 31;8:e52654. doi: 10.7554/eLife.52654 (PMC6867827; doi:10.7554/eLife.52654)
Supplement: Figure 7—source data 3. [file elife-52654-fig7-data3.xlsx]

## Sheet: Figure 7d
	Control	15n09006	15n09015	15n09020	15n10000	15n10003		Avg	StErr	n
	-50	-0.0177958	-0.0101001	-0.0217825	0.000614945	x		-0.0122658	0.00427018	4
	-40	0.0178587	0.00489811	0.262951	0.0487781	-0.00865646		0.065166	0.0450367	5
	-30	-0.0774798	-0.0541732	0.432949	0.13487	0.344013		0.156036	0.091909	5
	-20	0.069562	0.124016	0.592683	0.144059	0.5422		0.294504	0.100511	5
	-10	0.139533	0.366807	0.833752	0.301968	0.507765		0.429965	0.104656	5
	0	0.0355075	0.528078	0.718482	0.355999	0.593079		0.446229	0.105682	5
	10	-0.00381916	0.701937	0.823589	0.27389	0.341764		0.427472	0.134043	5
	20	-0.0359295	0.851903	0.754026	0.347622	0.391882		0.461901	0.141878	5
	30		0.997465	0.85706	0.136471	0.246734		0.559433	0.186603	4
	shRNA	15n09000	15n09003	15n10012	15n10018			Avg	StErr	n
	-50	x	-0.102562	0.0071731	0.0235513			-0.023946	0.0323263	3
	-40	0.045164	0.0434658	0.0465449	-0.0125731			0.0306504	0.0124895	4
	-30	0.143799	0.0833786	0.140643	0.199568			0.141847	0.020548	4
	-20	0.324438	0.184261	0.147392	0.146117			0.200552	0.0365739	4
	-10	0.413304	0.275184	0.184133	0.153233			0.256464	0.0505209	4
	0	0.359361	0.335324	0.165685	0.174916			0.258822	0.0444939	4
	10	0.285837	0.178356	0.0680525	0.120144			0.163097	0.0404477	4
	20	-0.0116882	0.325893	0.138481	0.158344			0.152758	0.0598192	4
	30	0.0910882	0.0704495	-0.019342	-0.115388			0.00670187	0.0409031	4

## Sheet: Figure 7e
	Control	15n09006	15n09015	15n09020	15n10000	15n10003		Avg	StErr	n
	-50	0.00144886	0	0	-0.0454781	0		-0.00880584	0.008204	5
	-40	-0.0438628	0.0786468	0.100527	0.0223205	0.000497773		0.0316259	0.02342	5
	-30	0.114543	0.200195	0.198025	0.0325872	0.207668		0.150604	0.0304583	5
	-20	0.539149	0.397422	0.269651	0.150135	0.554063		0.382084	0.0695479	5
	-10	0.599413	0.492668	0.603407	0.312067	0.414122		0.484336	0.0498384	5
	0	0.468917	0.474958	0.644325	0.291342	0.614315		0.498771	0.0562215	5
	10	0.678504	0.423265	x	0.299333	0.567625		0.492182	0.0717407	4
	shRNA	15n09000	15n09003	15n10012	15n10018			Avg	StErr	n
	-50	x	0.0442879	-0.0328779	0.0353423			0.0155841	0.0198966	3
	-40	-0.00138	0.131728	0.0441912	-0.0108107			0.0409321	0.0281981	4
	-30	0.020984	0.00575119	0.0945914	0.189025			0.077588	0.0362905	4
	-20	0.171928	0.0502846	0.185994	0.0806218			0.122207	0.0289861	4
	-10	0.405446	0.0662257	0.212113	0.182394			0.216545	0.0609638	4
	0	0.305955	0.16822	0.175989	0.247136			0.224325	0.0281379	4
	10	0.274868	0.179321	0.152863	0.0308409			0.159473	0.0435171	4
