# Supplementary material for: A microtranslatome coordinately regulates sodium and potassium currents in the human heart
Source: eLife. 2019 Oct 31;8:e52654. doi: 10.7554/eLife.52654 (PMC6867827; doi:10.7554/eLife.52654)
Supplement: Figure 7—source data 4. [file elife-52654-fig7-data4.xlsx]

## Sheet: Figure 7g
	Condition	1b shRNA	1b shRNA	1b shRNA	CN	CN	CN	CN	CN	CN	CN	CN	CN	1b shRNA	1b shRNA	1b shRNA	CN	CN	CN	CN	1b shRNA	1b shRNA	CN	CN	CN	1b shRNA
	File	16517001	16517004	16517008	16517014	16517015	16517018	16517019	16520000	16520002	16520004	16520007	16520009	16520013	16520015	16520016	16602003	16608001	16608002	16608005	16608007	16608008	16614001	16614002	16614003	16614004		Mean	Mean
	Cm	9.5	78.4	37.4	30	38.3	23.2	32.5	41.2	61	34.3	36	26.3	204	65.9	50.1	58.2	47.8	57.7	46.2	83.8	69.8	31.8	55.5	54.5	52		Control	1b shRNA
	Rs	5	4.3	2.8	5.5	3.8	6.1	2.5	5.5	4.5	5.6	6	11	1.3	3.3	1.6	2.3	5.4	3.3	5	3.3	4	5.5	2.6	2	3.4		n	n
	Correction	0.4	0.6	0.4	0.65	0.4	0.6	0.4	0.4	0.6	0.4	0.6	0.7	0.85	0.4	0.4	0.6	0.6	0.4	0.7	0.4	0.7	0.6	0.4	0	0		16	9	error CN	error 1b
	-140	-1.70898	0.724014	1.20977	-3.84843	-1.15335	-2.26251	-1.36324	-1.13416	-1.04383	-0.750884	-4.39114	-3.03894	-0.730646	0.280968	-1.37171	-1.98153	-0.898563	-0.801419	-3.82907	-1.80816	-1.1726	-1.88438	-0.824799	-0.896253	-4.48305		-1.88141	-1.00671	0.317784	0.55863
	-130	-3.479	0.662058	0.71361	-1.94524	-1.33863	-2.99914	-1.71829	-0.872132	-1.23265	-0.460015	-3.37389	-2.52253	-0.682132	-1.27889	-0.348671	-1.46474	-0.909949	-1.20344	-1.85949	-2.80686		-1.57743	-0.824799	-0.755748	-4.66585		-1.56613	-1.48572	0.212295	0.600561
	-120	-1.83105	-0.463862	-0.756634	1.79763	-1.14039	-1.86789	-1.90995	-0.563752	-1.3227	-0.591902	-2.42445	-2.2388	-1.6742	-0.924462	-1.17833	-1.69632	-1.10307	-0.870804	-1.61435	0.458062	-1.89751	-1.95818	-0.956767	-0.72424	-1.47997		-1.19912	-1.08311	0.268719	0.235694
	-110	-2.44141	0.892432	-0.906689	1.91794	-1.31356	-1.89419	-1.46934	-1.34397	-1.19327	-1.02868	-1.54283	-2.96085	-0.432361	-1.13019	-3.75242	-1.09358	-0.987148	-0.837157	-1.70649	-1.94383		-1.61671	-0.505877	-0.955135	-3.29262		-1.15818	-1.62589	0.249846	0.501357
	-100	-2.62451	0.712142	0.957132	1.25849	-1.33821	-1.76265	-1.63627	-1.21075	-1.54444	-0.676447	-2.10232	-2.35705	2.02104	-0.916683	-4.64931	-1.25521	-1.52007	-0.950348	-3.80095	-0.745603	-0.578127	-1.43192	-0.516874	-0.916354	-5.66871		-1.36009	-1.27696	0.289479	0.84293
	-90	-3.23486	0.530684	-0.89694	2.14505	-1.54112	-1.39434	-2.06789	-0.908312	-1.37983	-0.548521	-2.27186	-1.88433	-1.0086	-1.38183	-2.57902	-1.67448	-5.70671	-0.96511	-8.69819	-1.40246	-1.29903	-1.40797	-0.560864	-0.817043	-3.63412		-1.8551	-1.65624	0.619862	0.381844
	-80	-4.3335	-0.424807	1.00969	1.77033	-1.33842	-2.26251	-1.58138	-1.07177	-0.536761	-0.721022	-3.49257	-2.10218	-0.710222	-0.517155		-1.36787	-5.83215	-1.00443	-7.28438	-0.781599	-1.19911	-1.49396	-1.35267	-0.714881	-2.73687		-1.89916	-1.2117	0.532202	0.34288
	-70	-4.45557	-0.670686	-1.1163	-1.11549	-1.48673	-1.81527	-1.77383	-0.79544	-1.31334	-0.788037	-1.69542	-2.4972	-0.303083	-0.817135		-1.47296	-7.71571	-0.903255	-8.67132	-1.12719	-2.16299	-4.12555	-0.890783	-0.812085	-1.93903		-2.36703	-1.574	0.557329	0.207292
	-60	-6.83594	-0.769214	0.87511	-6.11435	-8.95756	-5.36688	-5.76178	-2.9928	-4.85054	-0.919157	-3.4078	-5.97012	-4.23748	-5.87945	-0.643522	-2.88807	-9.60771	-4.17449	-8.26268	-1.2548	-4.50417	-2.13434	-0.901781	-1.18277	-2.12701		-4.5933	-2.81961	0.649616	0.723736
	-50	-17.8223	-5.23085	-3.04222	-51.9257	-106.505	-26.1504	-77.0179	-27.8811	-35.3668	-2.01783	-21.9387	-43.9768	-72.9329	-22.5452	-17.6107	-27.7141	-101.199	-74.9004	-77.3719	-7.31508	-11.1905	-5.94417	-11.2943	-2.88309	-11.4556		-43.3805	-18.7939	7.55066	7.09253
	-40	-77.8809	-16.032	-13.6464	-69.8322	-122.3	-62.0612	-198.566	-51.3567	-61.3495	-5.33202	-75.0563	-90.0033	-70.3281	-30.2766	-39.1611	-109.546	-115.868	-96.8802	-134.545	-22.1742		-16.2774	-30.0557	-6.55327	-21.359		-77.8489	-36.3573	9.98437	6.05208
	-30	-138.672	-18.7654	-24.7929	-71.975	-123.925	-75.3468	-207.077	-44.2473	-63.0137	-8.28473	-86.7716	-96.864	-58.9089	-35.9896	-45.8184	-123.365	-101.184	-88.6922	-126.985	-24.3737	-13.2141	-21.9586	-35.7743	-10.0452	-22.4909		-80.3444	-42.5584	9.91574	4.77637
	-20	-148.438	-16.6062	-24.9333	-67.7473	-88.2368	-76.7412	-192.822	-43.0152	-56.102	-8.46955	-77.752	-87.8308	-43.4762	-18.2764	-34.5231	-111.207	-84.807	-74.5576	-106.325	-20.9141	-11.9675	-21.2983	-33.047	-9.56158	-21.0562		-71.22	-37.7989	8.02084	3.20875
	-10	-141.418	-13.5491	-20.9291	-52.7342	-58.5844	-64.9551	-165.09	-34.8909	-46.4129	-7.14902	-64.3243	-74.559	-39.0213	-18.3486	-31.5533	-91.3553	-72.9812	-61.4497	-88.3645	-16.3286	-9.16316	-16.96	-25.3708	-8.31342	-13.5883		-58.3434	-33.7667	6.51379	3.14411
	0	-113.22	-10.9978	-18.113	-35.8297	-38.1123	-48.9071	-135.407	-11.3633	-35.3026	-6.27175	-41.6395	-56.821	-30.3631	-14.3738		-74.918	-60.3223	-48.5295	-71.3143	-13.4539	-5.67992	-13.1865	-17.9586	-6.45154	-7.36719		-43.8959	-26.6961	5.48843	2.5403
	10	-87.7075		-14.1363	-23.3699	-22.8421	-32.4381	-106.752		-26.0776	-4.25586	-28.0931	-41.6912	-22.4004		-12.2602	-58.16	-57.6427	-36.3503	-62.5226	-6.41063	-1.76319	-9.05425	-11.2943	-3.8752	-3.03538		-34.9613	-21.102	4.59233	2.37745
	20	-62.3169		-10.9964	-10.5917	-11.1763	-18.1001	-78.1497	0.094126	-17.3322	-2.59614	-11.5628	-27.0383	-13.209	-2.59215	-7.94449	-37.4978	-51.3851	-26.6226	-73.5542	-2.42684	-2.1683	-5.07495	-4.99279	-1.93281	-0.64035		-23.5946	-12.7868	5.06089	1.53229

## Sheet: Figure 7h
	Condition	1b shRNA	1b shRNA	1b shRNA	CN	CN	CN	CN	CN	CN	CN	CN	CN	1b shRNA	1b shRNA	1b shRNA	CN	CN	CN	CN	1b shRNA	1b shRNA	CN	CN	CN	1b shRNA
	File	16517001	16517004	16517008	16517014	16517015	16517018	16517019	16520000	16520002	16520004	16520007	16520009	16520013	16520015	16520016	16602003	16608001	16608002	16608005	16608007	16608008	16614001	16614002	16614003	16614004		Mean	Mean
	Cm	9.5	78.4	37.4	30	38.3	23.2	32.5	41.2	61	34.3	36	26.3	204	65.9	50.1	58.2	47.8	57.7	46.2	83.8	69.8	31.8	55.5	54.5	52		n	n
	Rs	5	4.3	2.8	5.5	3.8	6.1	2.5	5.5	4.5	5.6	6	11	1.3	3.3	1.6	2.3	5.4	3.3	5	3.3	4	5.5	2.6	2	3.4		Control	shRNA
	Correction	0.4	0.6	0.4	0.65	0.4	0.6	0.4	0.4	0.6	0.4	0.6	0.7	0.85	0.4	0.4	0.6	0.6	0.4	0.7	0.4	0.7	0.6	0.4	0	0		16	9	error CN	error sh
	-140	0.00922769	-0.0040723	-0.00634607	0.0227104	0.00713771	0.0131408	0.00720362	0.0071457	0.00585949	0.00427498	0.0262941	0.0170617	0.00421985	-0.00171577	0.0081346	0.0108915	0.00446434	0.0044419	0.0186868	0.0109182	0.00720099	0.0110189	0.00494721	0.00532997	0.0283914		0.0106631	0.00621762	0.00178626	0.00343175
	-130	0.0198571	-0.00394576	-0.00395062	0.0121991	0.00883089	0.0184933	0.00958636	0.00586431	0.00733094	0.0027771	0.0214896	0.0150048	0.00418114	0.00831764	0.00219807	0.00851922	0.00475727	0.00706152	0.00954034	0.0180377		0.00979694	0.00526288	0.00477857	0.031547		0.00945582	0.00953029	0.00133065	0.00396224
	-120	0.0110837	0.00293975	0.00443429	-0.0120277	0.00805442	0.0122746	0.0112852	0.00406399	0.00836394	0.00380288	0.0164927	0.0141593	0.0109321	0.00643077	0.00792812	0.0104754	0.00608506	0.00542818	0.00873056	-0.0031458	0.0132843	0.012967	0.00652104	0.00488845	0.0107321		0.00759781	0.00717993	0.00177104	0.00164703
	-110	0.0157305	-0.00603852	0.0056445	-0.0137529	0.00998258	0.013323	0.00922698	0.0104412	0.00805484	0.00706287	0.0112615	0.0199902	0.00302044	0.00844965	0.0270686	0.00719776	0.00576351	0.00556536	0.0097565	0.0143339		0.011465	0.00370009	0.00691358	0.0257434		0.007872	0.0117441	0.00176606	0.00372814
	-100	0.0180749	-0.00516832	-0.00635409	-0.00972127	0.0110063	0.0133358	0.0109638	0.0101985	0.01118	0.00498686	0.0165536	0.0170659	-0.0151792	0.00740718	0.0361459	0.00884366	0.00942532	0.00676776	0.0230489	0.00593583	0.00470638	0.0109296	0.00407887	0.00715044	0.04808		0.00973838	0.0104054	0.00195882	0.00678441
	-90	0.0239262	-0.00415279	0.00637791	-0.0179567	0.0138112	0.0114127	0.0148509	0.0083547	0.0107679	0.00436561	0.0194174	0.0147082	0.00819038	0.0121473	0.0217407	0.0126919	0.037724	0.00739985	0.0561508	0.0121309	0.0115123	0.0116348	0.0048052	0.0069151	0.03368		0.0135658	0.0139503	0.00414902	0.00347263
	-80	0.0346121	0.00360648	-0.00772927	-0.0161738	0.0131753	0.0201695	0.0122356	0.0108569	0.00454332	0.00623474	0.0326405	0.0177978	0.0062771	0.00498433		0.0112181	0.0412821	0.00834089	0.0502691	0.00740077	0.0116601	0.0134576	0.0126749	0.00660987	0.0279554		0.0153333	0.0110959	0.00397376	0.00331007
	-70	0.0386762	0.00622217	0.00925374	0.0112158	0.0162333	0.0177664	0.0148757	0.00896588	0.0121445	0.00745923	0.0174784	0.0230978	0.00293842	0.00871554		0.0131592	0.0587749	0.00817997	0.0642759	0.0117894	0.0232984	0.0408418	0.00920991	0.00827363	0.022059		0.020747	0.0153691	0.00412947	0.00239939
	-60	0.0649793	0.007866	-0.00791007	0.0683496	0.109794	0.0582252	0.0527425	0.038019	0.0494232	0.00961	0.0391695	0.0608485	0.0454933	0.0701973	0.00726108	0.0283329	0.0792221	0.0415692	0.0661503	0.014657	0.0543727	0.023451	0.0103988	0.0134172	0.0273038		0.0467952	0.03158	0.00701325	0.00840209
	-50	0.187205	0.0595839	0.030231	0.653507	1.48782	0.31823	0.776049	0.405729	0.401244	0.0235602	0.284914	0.499086	0.877178	0.305671	0.22398	0.301457	0.909445	0.828335	0.67334	0.0967468	0.153634	0.0733731	0.147214	0.0368901	0.168709		0.488762	0.23366	0.0968781	0.0849982
	-40	0.914075	0.206094	0.150569	1.0054	1.98587	0.859876	2.22498	0.874624	0.785094	0.0704866	1.12022	1.1522	0.961488	0.474881	0.570643	1.33701	1.14408	1.20464	1.2825	0.337968		0.229217	0.450474	0.0961546	0.368885		0.988927	0.498075	0.129041	0.0839664
	-30	1.844	0.276818	0.30748	1.21054	2.40235	1.21186	2.61317	0.908221	0.924729	0.126203	1.52228	1.42207	0.932914	0.669497	0.781534	1.71499	1.10856	1.25942	1.33798	0.438294	0.250082	0.359902	0.630716	0.172736	0.469522		1.18286	0.663349	0.152853	0.0788358
	-20	2.27659	0.287356	0.353001	1.36982	2.12184	1.47085	2.7847	1.11097	0.964898	0.152204	1.65426	1.51134	0.818067	0.417688	0.709968	1.79558	1.04345	1.23393	1.25224	0.458537	0.279361	0.417509	0.707339	0.198565	0.55555		1.23684	0.684013	0.141599	0.0612969
	-10	2.56184	0.283515	0.34518	1.3365	1.85482	1.54015	2.78663	1.21492	0.964064	0.156619	1.73844	1.54961	0.904423	0.543564	0.816887	1.75908	1.02393	1.21869	1.17964	0.458532	0.279034	0.413529	0.690925	0.217894	0.487007		1.22784	0.742221	0.134355	0.073189
	0	2.50477	0.291027	0.357737	1.21634	1.76568	1.52005	2.74973	0.607059	0.925535	0.175946	1.54214	1.49079	0.916067	0.605054		1.78658	0.984444	1.20055	1.0987	0.525327	0.248696	0.425194	0.672102	0.229156	0.411538		1.14938	0.732527	0.131721	0.0709004
	10	2.49156		0.347908	1.2011	1.9717	1.46285	2.72025		0.926613	0.165947	1.65242	1.4829	0.96783		0.658224	1.82127	1.12418	1.19484	1.13868	0.410661	0.137333	0.430891	0.67549	0.213469	0.384148		1.21217	0.771095	0.142283	0.0880333
	20	2.47272		0.35898	1.11999		1.48671	2.67237	0.0734573	0.955317	0.165931	1.65155	1.49262	1.00487	0.69011	0.920969	1.7096	1.24493	1.30357	1.63789	0.432553	0.763808	0.460821	0.742963	0.237054	-0.305161		1.13032	0.792355	0.147884	0.137518
