# Supplementary material for: A microtranslatome coordinately regulates sodium and potassium currents in the human heart
Source: eLife. 2019 Oct 31;8:e52654. doi: 10.7554/eLife.52654 (PMC6867827; doi:10.7554/eLife.52654)
Supplement: Figure 7—source data 5. [file elife-52654-fig7-data5.xlsx]

## Sheet: Figure 7j
	File	17707000	17707009	17707029	17707040	17707055	17707066	17707072	17711005	17711015	17711022	17712002	17712010	17712019	17712030	18409000	18409002	18409004	18424127	18827000	18827002	18827005	18829000	18829007		Mean	Mean
	Condition	CN	CN	CN	1b	1b	1b	1b	CN	1b	1b	CN	CN	CN	CN	CN	CN	CN	CN*	CN	CN	1b	CN	1b		n	n
	Cm	48.6	27	38.6	31.8	70.3	47.8	22.1	66.8	86.7	55.2	52.1	38.8	48.5	54.5	23.9	25	28.8	93.4	36.2	74.4	120	47	150		14	8
	Rs	7.3	7.2	4.6	6.8	8	7.2	4.3	6.6	7.2	7	5.7	5.5	6.4	4	2.6	3.8	5.9	3.3	6.5	8	10.1	4.6	8		CN	1b shRNA	error CN	error 1b
	INa,late	-133.506	-266.448	-460.098	-116.063	-192.976	0	-167.235	-186.829	0	-140.174	-442.578	-144.33	-397.192	-364.583	-275.971	-171.152	-161.021	0	-143.53	-1050.81	-98.8567	-447.596	-112.487		-331.831	-103.474	64.5248	25.0349

## Sheet: Figure 7k
	File	17707000	17707009	17707029	17707040	17707055	17707066	17707072	17711005	17711015	17711022	17712002	17712010	17712019	17712030	18409000	18409002	18409004	18424127	18827000	18827002	18827005	18829000	18829007		Mean	Mean
	Condition	CN	CN	CN	1b	1b	1b	1b	CN	1b	1b	CN	CN	CN	CN	CN	CN	CN	CN*	CN	CN	1b	CN	1b		n	n
	Cm	48.6	27	38.6	31.8	70.3	47.8	22.1	66.8	86.7	55.2	52.1	38.8	48.5	54.5	23.9	25	28.8	93.4	36.2	74.4	120	47	150		14	8
	Rs	7.3	7.2	4.6	6.8	8	7.2	4.3	6.6	7.2	7	5.7	5.5	6.4	4	2.6	3.8	5.9	3.3	6.5	8	10.1	4.6	8		CN	1b shRNA	error CN	error 1b
	INa,peak	-55.6049	-85.4148	-101.301	-146.425	-23.2191	-7.83891	-8.99095	-26.1662	-42.7532	-67.2844	-88.8964	-73.0206	-34.3546	-68.0991	-197.218	-172.048	-177.59	-111.647	-48.3287	-21.5645	-11.0417	-155.319	-7.86333		-93.209	-39.427	15.8485	17.0212
