# Supplementary material for: A microtranslatome coordinately regulates sodium and potassium currents in the human heart
Source: eLife. 2019 Oct 31;8:e52654. doi: 10.7554/eLife.52654 (PMC6867827; doi:10.7554/eLife.52654)
Supplement: Figure 8—source data 1. [file elife-52654-fig8-data1.xlsx]

## Sheet: Figure 8a
KCND2 primers			2^-dCt	dCt	ddCt	Fold	LoG(Fold)	exp average	Mean centered		expStDev	autoscaled				Avg	SEM	lower95%CI	upper95%CI		linAvg	lin loCI	lin upCI		recalAvg	recal loCI	recal upCI		lower CI	upper CI
	shRNA scramble	exp1	0.0260132	5.26461	0	1	0	-0.00956002	0.00956002	exp1	0.0675958	0.141429	0.00645153		shRNA scramble	0.0284017	0.0122999	-0.0245204	0.0813237		1.06758	0.945104	1.20593		1	0.885275	1.12959		0.114725	0.129593
		exp2	0.0279185	5.16264	-0.101975	1.07324	0.0306975		0.0609658			1.07405	0.0489946		shRNA hERG1a	-0.0111626	0.0206413	-0.0999748	0.0776497		0.974625	0.794374	1.19578		0.912926	0.744087	1.12008		0.16884	0.207151
		exp3	0.0113731	6.45823	1.19362	0.437205	-0.359315		0.00814921			0.652368	0.0297589		shRNA hERG1b	-0.0172391	0.0298213	-0.14555	0.111072		0.961083	0.715237	1.29143		0.900242	0.669959	1.20968		0.230283	0.309437
	shRNA hERG1a	exp1	0.0215659	5.53511	0.270494	0.829035	-0.0814269	-0.0302682	-0.0718669	exp2	0.0567625	-1.06319	-0.048499
		exp2	0.0237293	5.39719	0.132577	0.912201	-0.0399097		-0.00964145			-0.169856	-0.00774826
		exp3	0.011323	6.4646	1.19999	0.43528	-0.361232		0.00623249			0.498929	0.0227595
	shRNA hERG1b	exp1	0.0293725	5.08939	-0.175221	1.12914	0.0527468	-0.367464	0.0623069	exp3	0.0124917	0.921756	0.0420475
		exp2	0.0215577	5.53566	0.271045	0.828719	-0.0815926		-0.0513243			-0.904194	-0.0412463
		exp3	0.0107981	6.53308	1.26846	0.415101	-0.381846		-0.0143817			-1.1513	-0.0525184

## Sheet: Figure 8b
KCND2 primers			2^-dCt	dCt	ddCt	Fold	LoG(Fold)	exp average	Mean centered		expStDev	autoscaled				Avg	SEM	lower95%CI	upper95%CI		linAvg	lin loCI	lin upCI		recalAvg	recal loCI	recal upCI		lower CI	upper CI
	shRNA scramble	exp1	0.100922	3.30869	0	1	0	-0.0163647	0.0163647	exp1	0.0144954	1.12896	0.0225496		shRNA scramble	0.0216657	0.000497285	0.019526	0.0238053		1.05115	1.04599	1.05634		1	0.995085	1.00494		0.0049146	0.00493887
		exp2	0.356865	1.48655	-1.82214	3.53605	0.548518		0.0258073			1.04281	0.0208289		shRNA hERG1a	-0.00425584	0.00152727	-0.0108272	0.00231547		0.990248	0.975378	1.00535		0.94206	0.927913	0.956423		0.014147	0.0143627
		exp3	0.469353	1.09126	-2.21743	4.65064	0.667513		0.0223809			1.08234	0.0216185		shRNA hERG1b	-0.0174098	0.0010327	-0.0218532	-0.0129665		0.960705	0.950926	0.970585		0.913954	0.904651	0.923353		0.00930317	0.00939884
	shRNA hERG1a	exp1	0.0960468	3.38012	0.0714325	0.951693	-0.0215033	0.522711	-0.00513862	exp2	0.0247478	-0.3545	-0.00708071
		exp2	0.334519	1.57984	-1.72885	3.31463	0.520435		-0.00227613			-0.0919729	-0.00183705
		exp3	0.441705	1.17884	-2.12984	4.3767	0.641147		-0.00398554			-0.192741	-0.00384977
	shRNA hERG1b	exp1	0.0947099	3.40034	0.0916546	0.938446	-0.0275908	0.645132	-0.0112261	exp3	0.0206782	-0.774458	-0.0154689
		exp2	0.318542	1.65045	-1.65824	3.15631	0.49918		-0.0235311			-0.950836	-0.0189918
		exp3	0.42729	1.22671	-2.08197	4.23386	0.626737		-0.0183954			-0.8896	-0.0177687
