# Supplementary material for: A microtranslatome coordinately regulates sodium and potassium currents in the human heart
Source: eLife. 2019 Oct 31;8:e52654. doi: 10.7554/eLife.52654 (PMC6867827; doi:10.7554/eLife.52654)
Supplement: Figure 8—source data 2. [file elife-52654-fig8-data2.xlsx]

## Sheet: Figure 8d
	Condition			CN			CN			CN			CN			1b shRNA			CN			CN			CN			CN			CN			CN			1b shRNA			1b shRNA			1b shRNA			1b shRNA			1b shRNA
	File	16520017	16520017	16520017	16520019	16520019	16520019	16520022	16520022	16520022	16520024	16520024	16520024	16520028	16520028	16520028	16615001	16615001	16615001	16615003	16615003	16615003	16615004	16615004	16615004	16615006	16615006	16615006	16615009	16615009	16615009	16615011	16615011	16615011	16615012	16615012	16615012	16615014	16615014	16615014	16615016	16615016	16615016	16615019	16615019	16615019	16621001	16621001	16621001
	Cm	61.5	61.5	61.5	38.3	38.3	38.3	66.3	66.3	66.3	51.8	51.8	51.8	57.7	57.7	57.7	29	29	29	48.8	48.8	48.8	42	42	42	38.3	38.3	38.3	79.6	79.6	79.6	61.3	61.3	61.3	95.7	95.7	95.7	119	119	119	55.8	55.8	55.8	80.6	80.6	80.6	51.8	51.8	51.8
	Rs	5.9	5.9	5.9	3.6	3.6	3.6	1.2	1.2	1.2	2.9	2.9	2.9	5.5	5.5	5.5	4.5	4.5	4.5	12.3	12.3	12.3	8	8	8	11.3	11.3	11.3	7.8	7.8	7.8	5.2	5.2	5.2	7.6	7.6	7.6	4.8	4.8	4.8	10	10	10	3.8	3.8	3.8	4.5	4.5	4.5
	Correction	0	0	0	0	0	0	0	0	0	0	0	0	0	0	0	0	0	0	0.6	0.6	0.6	0.4	0.4	0.4	0.6	0.6	0.6	0.4	0.4	0.4	0.6	0.6	0.6	0	0	0	0.4	0.4	0.4	0.4	0.4	0.4	0.4	0.4	0.4	0.4	0.4	0.4
	Verror	3.4897	1.79436	1.69533	0.555559	0.394189	0.16137	1.69374	0.822565	0.871177	0.565722	0.388405	0.177317	0	0	0	1.2167	0.338274	0.878426	4.24217	1.16332	3.07885	1.09086	0.346103	0.744752	1.31757	0.344609	0.972964	3.30511	1.00406	2.30105	0.69074	0.290164	0.400577	0	0	0	2.4143	1.00125	1.41306	7.12616	2.1647	4.96146	2.67313	0.55325	2.11988	1.11697	0.51636	0.600612
	-60	-2.10303	-2.03876	-0.0642724	-0.438604	-0.235132	-0.203472	-2.12531	-1.40798	-0.71733	-0.662785	-0.471804	-0.190981	-1.38981	-1.05613	-0.333676	-2.81211	-2.32239	-0.489727	-4.08048	-4.03566	-0.0448179	-1.77569	-1.55684	-0.218855	-2.43272	-2.31366	-0.119052	-1.8	-1.64031	-0.15969	-0.814561	-0.692093	-0.122468	-0.980725	-0.852044	-0.128681	-1.81287	-1.67067	-0.1422	-5.38234	-4.81057	-0.571767	-0.588598	-0.373347	-0.21525	-1.33601	-1.03662	-0.29939
	-50	-1.79	-1.71834	-0.0716618	-0.113766	-0.0400008	-0.073765	-1.70937	-1.25405	-0.455324	-0.435965	-0.299073	-0.136893	-0.935914	-0.444898	-0.491017	-2.06608	-1.7683	-0.297777	-3.13041	-2.99426	-0.136147	-1.28939	-1.13802	-0.151367	-1.63345	-1.49409	-0.139359	-1.39124	-1.26823	-0.123009	-0.654659	-0.529094	-0.125565	-0.922194	-0.828093	-0.0941007	-1.38428	-1.24706	-0.137219	-4.28852	-3.97338	-0.315142	-0.397561	-0.257467	-0.140095	-0.968604	-0.71279	-0.255813
	-40	-1.37288	-1.25048	-0.122401	0.438242	0.283701	0.154541	-1.27795	-0.936017	-0.34193	-0.170992	-0.0667592	-0.104232	-0.637105	-0.337822	-0.299283	-1.1523	-0.967559	-0.184743	-1.97048	-1.83022	-0.140262	-0.81083	-0.665576	-0.145254	-0.864532	-0.651955	-0.212576	-0.842903	-0.748642	-0.0942608	-0.352399	-0.218804	-0.133595	-1.0316	-0.79119	-0.240412	-0.722762	-0.554305	-0.168457	-3.51415	-3.16248	-0.351666	-0.224023	-0.134937	-0.0890859	-0.500771	-0.386451	-0.11432
	-30	-0.991024	-0.684785	-0.306239	0.585651	0.431955	0.153695	-0.831162	-0.66963	-0.161532	0.455884	0.248554	0.20733	-0.380974	-0.046095	-0.334879	-0.342007	-0.245172	-0.0968355	-0.814606	-0.702191	-0.112415	-0.403268	-0.243167	-0.160101	0.211153	0.0724754	0.138678	-0.300959	-0.127029	-0.17393	0.184201	0.102978	0.0812229	-0.603989	-0.503394	-0.100595	-0.0773625	0.0661799	-0.143542	-2.19858	-2.11807	-0.0805125	0.10223	0.00274751	0.0994826	-0.203254	-0.0128773	-0.190377
	-20	-0.97212	-0.307657	-0.664463	1.01991	0.93619	0.0837184	-0.656907	-0.373413	-0.283494	1.05807	0.614741	0.443331	-0.577824	-0.0395605	-0.538264	0.743146	0.092233	0.650913	0.566993	0.296298	0.270695	0.142035	0.0766079	0.0654268	0.697583	0.440348	0.257235	0.48115	0.331784	0.149366	0.468681	0.346319	0.122361	-0.299147	-0.157942	-0.141206	0.561687	0.370143	0.191544	-0.612539	-0.612639	9.9659e-05	0.219605	0.106184	0.113421	0.386169	0.228753	0.157416
	-10	-0.923734	0.157888	-1.08162	1.37733	1.18185	0.195481	0.375579	0.0670266	0.308552	1.83602	1.03094	0.805076	-0.614487	0.189655	-0.804141	1.41682	0.169117	1.2477	1.6036	1.01179	0.591812	0.351194	0.129511	0.221683	1.13336	0.519794	0.613565	0.929621	0.539995	0.389627	0.765606	0.475573	0.290033	0.427006	0.251357	0.175649	0.840924	0.405319	0.435605	1.35777	0.0200336	1.33774	0.775741	0.274836	0.500905	0.703043	0.383495	0.319548
	0	0.943765	0.396977	0.546788	2.16674	1.71065	0.456082	2.09445	1.11681	0.977638	2.34366	1.35765	0.986016	0.90568	0.613954	0.291726	2.25677	0.349884	1.90689	3.01483	1.36179	1.65304	0.630074	0.155829	0.474245	1.64426	0.624735	1.01953	1.4251	0.633878	0.791225	1.12263	0.686766	0.435862	1.34821	0.868875	0.479338	1.24122	0.521043	0.720177	3.76717	0.845629	2.92154	2.4144	0.669891	1.74451	1.24225	0.738627	0.503622
	10	1.70133	0.661155	1.04017	2.87172	2.22418	0.647538	4.60065	2.82036	1.78029	2.80754	1.66596	1.14159	2.33963	1.07827	1.26136	3.00816	0.65389	2.35427	4.84907	2.0034	2.84567	1.26395	0.4789	0.785053	2.40179	0.930419	1.47138	2.52049	1.08135	1.43915	1.72739	0.847296	0.880089	2.52445	1.45475	1.0697	1.86983	0.834879	1.03495	7.10905	1.82621	5.28284	5.58732	1.43202	4.1553	2.41057	1.32018	1.09039
	20	2.90596	1.08176	1.8242	3.64348	2.73555	0.907926	7.7037	4.43143	3.27227	2.87768	1.9946	0.883078	3.54024	1.70006	1.84017	4.3123	1.16305	3.14925	8.10899	2.48047	5.62851	2.02516	0.72847	1.29669	3.54274	1.33225	2.21049	3.83012	1.44041	2.38971	2.64377	1.30542	1.33835	3.89203	2.47423	1.4178	2.86717	1.2425	1.62468	10.5172	2.72492	7.79229	8.72823	1.95995	6.76828	3.77318	1.75307	2.02011
	30	4.15975	1.70086	2.45889	4.01551	3.05359	0.961924	10.5038	6.02262	4.48121	3.25459	2.11109	1.1435				5.56332	1.39572	4.1676	10.5617	2.96442	7.59732	2.8573	0.848652	2.00865	4.22002	1.41261	2.80741	5.578	1.92884	3.64916	3.5963	1.5137	2.0826	5.01945	3.5022	1.51725	3.68482	1.55061	2.13422	13.7769	3.75626	10.0207	11.7828	2.36345	9.41934	5.04362	2.61749	2.42613
	40	5.4192	2.52505	2.89415	4.1134	3.13313	0.980278	13.467	7.48389	5.98314	3.27072	2.27083	0.999891				6.51693	1.72583	4.7911	13.2152	3.26257	9.95263	3.55346	1.09858	2.45488	4.8739	1.78475	3.08915	6.58841	2.32156	4.26685	4.01472	1.78295	2.23177	6.41025	3.5022	2.90805	4.50516	1.95783	2.54733	17.4268	6.89563	10.5311	13.1184	2.46949	10.649	6.06648	2.98244	3.08404
	50	6.97828	3.25521	3.72307	4.14224	3.12682	1.01542	15.4757	9.18349	6.29219	3.62885	2.37459	1.25426				7.71558	2.11853	5.59705	15.3976	4.16503	11.2325	4.26554	1.36498	2.90056	5.77948	1.59985	4.17963	7.45587	2.45785	4.99802	4.66926	2.04042	2.62884	8.51864	3.5022	5.01643	5.29234	2.39628	2.89606	19.1644	7.45351	11.7109	13.9513	2.78683	11.1644	6.97236	3.33576	3.6366
	60	8.19615	4.35587	3.84028	3.94228	2.69816	1.24412	17.8725	9.90803	7.96447	3.71454	2.2971	1.41744				8.81901	2.34428	6.47472	16.2437	4.13537	12.1084	4.8425	1.46098	3.38153	6.72314	1.8251	4.89804	8.01077	2.65077	5.36	5.03316	2.13109	2.90207	10.1958	3.5022	6.69363	6.08129	2.7518	3.32949	20.4441	7.34122	13.1029	14.6314	2.91837	11.7131	7.48505	3.53421	3.95084
	70	9.61747	4.94519	4.67227	4.02929	2.85892	1.17037	21.2889	10.3389	10.9499	3.76596	2.58558	1.18038				9.32337	2.59213	6.73124	17.6687	4.84524	12.8234	5.41099	1.71678	3.69421	7.61092	1.99062	5.6203	8.87211	2.69526	6.17686	5.4174	2.27572	3.14168				7.04454	2.92148	4.12306	21.2848	6.46565	14.8192	14.5462	3.01059	11.5357	7.98636	3.69198	4.29438
[truncated: 22 more columns]
