# Supplementary material for: A microtranslatome coordinately regulates sodium and potassium currents in the human heart
Source: eLife journal article supplement (doi:10.7554/elife.52654), 2019-10-31

**A** Correlation of SCN5A and GAPDH mRNAs expression

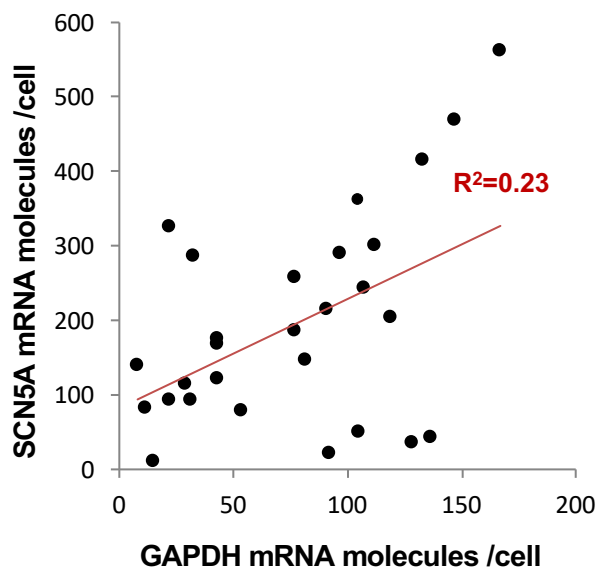

**B** Correlation of hERG1a and GAPDH mRNAs expression

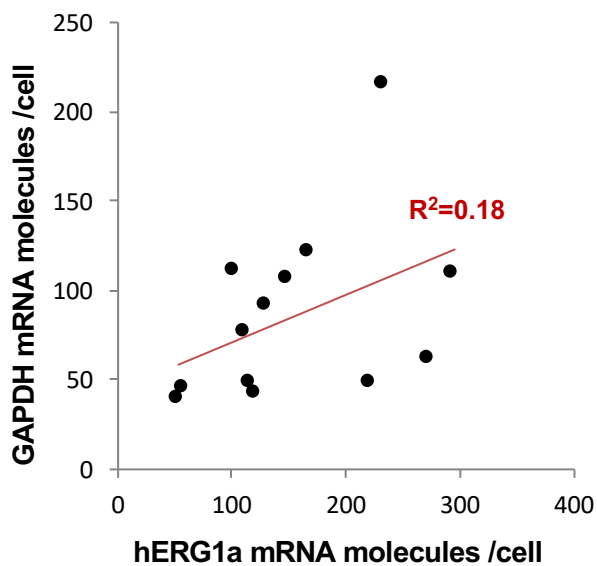

Supplement: supp [file elife-52654-supp-v1.zip]
