# Supplementary material for: A microtranslatome coordinately regulates sodium and potassium currents in the human heart
Source: eLife journal article supplement (doi:10.7554/elife.52654), 2019-10-31
Supplement: supp [file elife-52654-supp-v1.zip]

A *hERG1a mRNA*

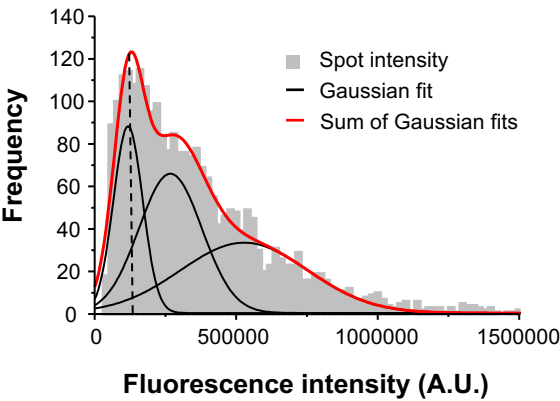

| Model    | Gauss                                                |                          |                          |
|----------|------------------------------------------------------|--------------------------|--------------------------|
| Equation | $y=y_0 + (A/(w*\sqrt{\pi/2}))*\exp(-2*((x-xc)/w)^2)$ |                          |                          |
| Plot     | Peak1                                                | Peak2                    | Peak3                    |
| y0       | $0.49 \pm 0.21$                                      | $0.49 \pm 0.21$          | $0.49 \pm 0.21$          |
| xc       | $117984.83 \pm 2256.31$                              | $267703.93 \pm 14735.19$ | $527984.86 \pm 76758.94$ |
| w        | $103169.32 \pm 7458.84$                              | $222635.33 \pm 40129.29$ | $450302.22 \pm 78120.74$ |
| A        | $1.14E7 \pm 2.16E6$                                  | $1.83E7 \pm 6.81E6$      | $1.87E7 \pm 5.78E6$      |

B *SCN5A mRNA*

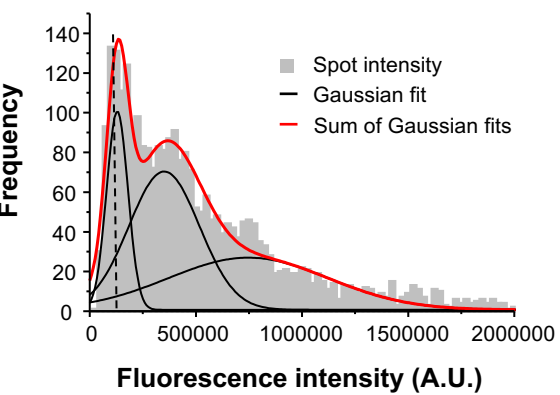

| Model    | Gauss                                                |                          |                           |
|----------|------------------------------------------------------|--------------------------|---------------------------|
| Equation | $y=y_0 + (A/(w*\sqrt{\pi/2}))*\exp(-2*((x-xc)/w)^2)$ |                          |                           |
| Plot     | Peak1                                                | Peak2                    | Peak3                     |
| y0       | $0.71 \pm 0.25$                                      | $0.71 \pm 0.25$          | $0.71 \pm 0.25$           |
| xc       | $129681.69 \pm 1775.62$                              | $350694.45 \pm 10021.78$ | $746868.44 \pm 133741.99$ |
| w        | $100467.91 \pm 5381.31$                              | $332189.87 \pm 38494$    | $754612.46 \pm 142927.70$ |
| A        | $1.26E7 \pm 1.15E6$                                  | $2.90E7 \pm 7.35E6$      | $2.48E7 \pm 7.91E6$       |

C *GAPDH mRNA*

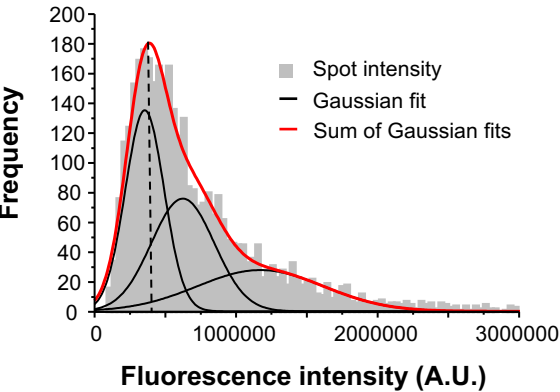

| Model    | Gauss                                                |                           |                           |
|----------|------------------------------------------------------|---------------------------|---------------------------|
| Equation | $y=y_0 + (A/(w*\sqrt{\pi/2}))*\exp(-2*((x-xc)/w)^2)$ |                           |                           |
| Plot     | Peak1                                                | Peak2                     | Peak3                     |
| y0       | $0.35 \pm 0.31$                                      | $0.35 \pm 0.31$           | $0.35 \pm 0.31$           |
| xc       | $354447.18 \pm 11207.17$                             | $623535.81 \pm 117199.66$ | $1.17E6 \pm 238744.98$    |
| w        | $274182.43 \pm 29650.81$                             | $444264.04 \pm 165298.03$ | $893413.86 \pm 242256.38$ |
| A        | $4.64E7 \pm 2.18E7$                                  | $4.21E7 \pm 3.35E7$       | $3.10E7 \pm 1.51E7$       |
