# Supplementary figures and images for: A microtranslatome coordinately regulates sodium and potassium currents in the human heart
Source: eLife journal article supplement (doi:10.7554/elife.52654), 2019-10-31

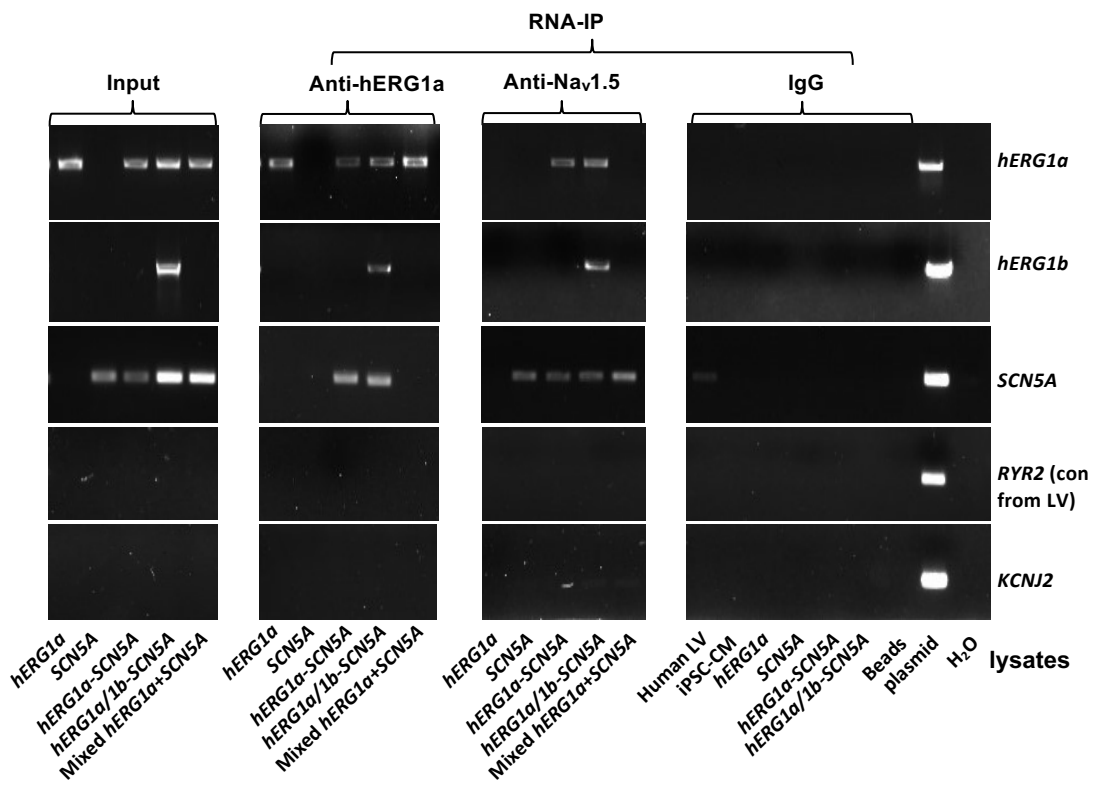

Supplement: supp [file elife-52654-supp-v1.zip]

**A**

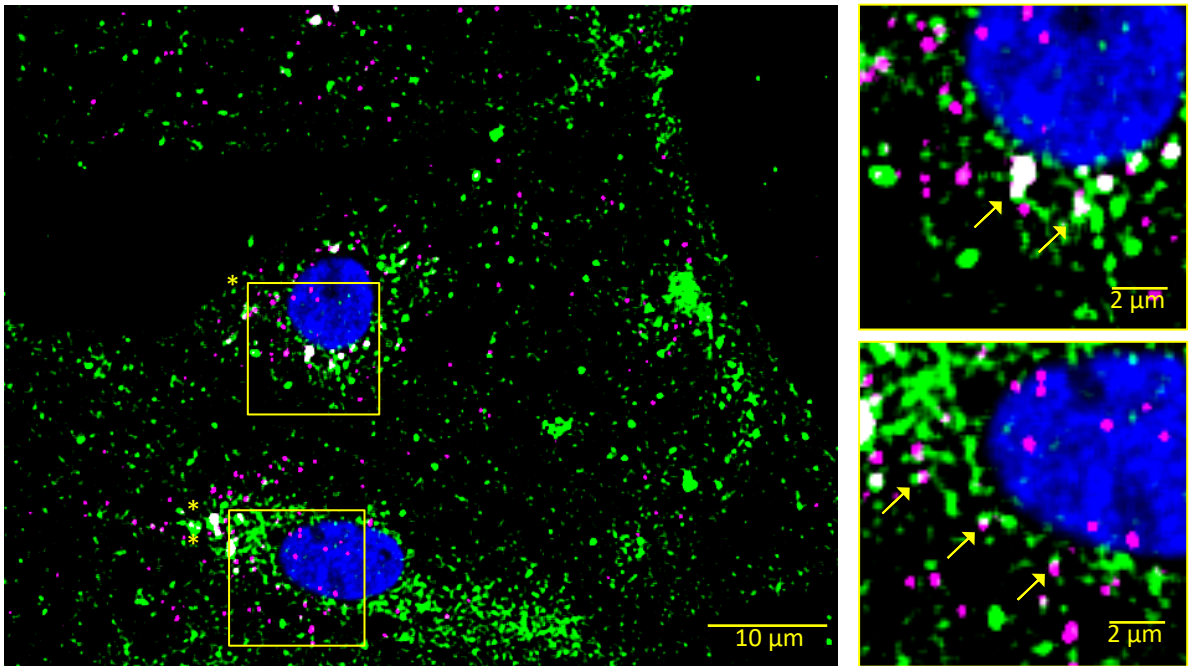

**B**

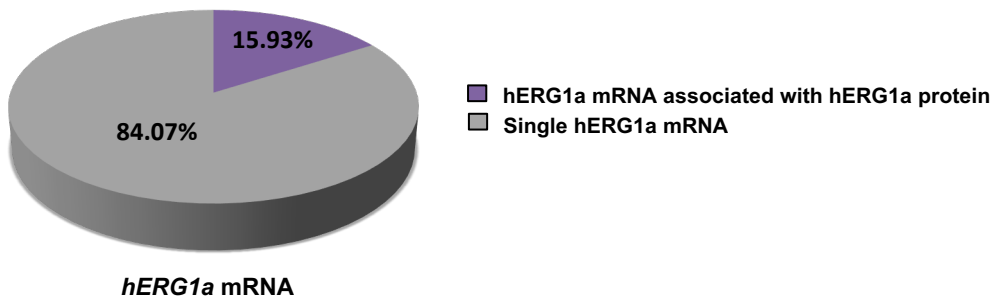

Supplement: supp [file elife-52654-supp-v1.zip]

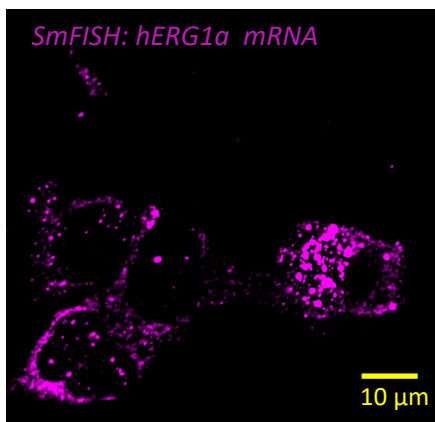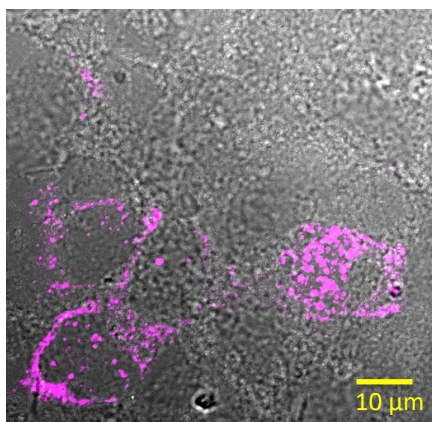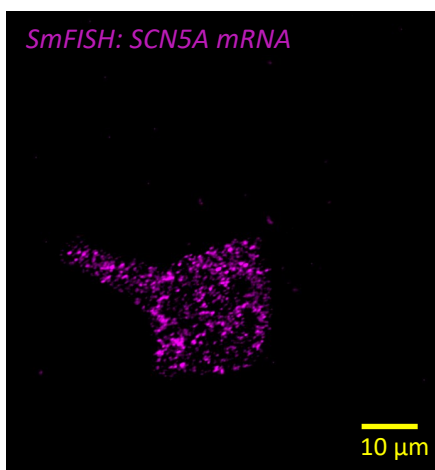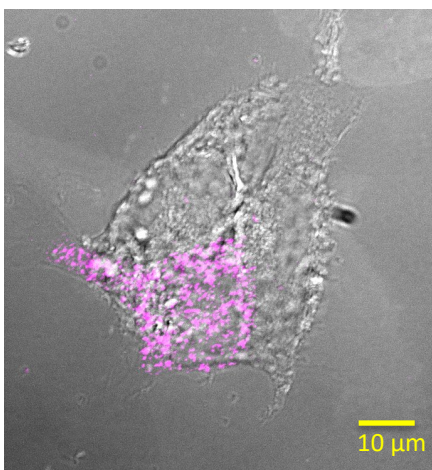

Supplement: supp [file elife-52654-supp-v1.zip]

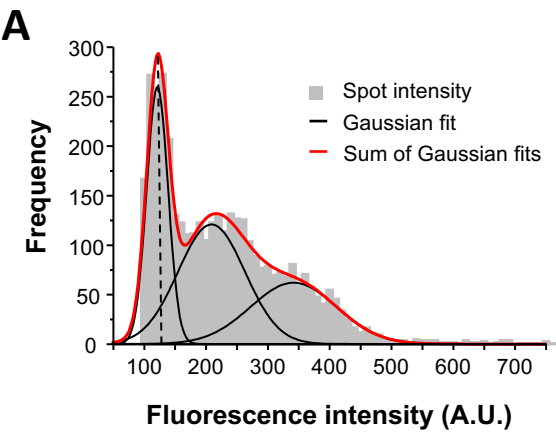

| Model    | Gauss                                                |                    |                    |
|----------|------------------------------------------------------|--------------------|--------------------|
| Equation | $y=y_0 + (A/(w*\sqrt{\pi/2}))*\exp(-2*((x-xc)/w)^2)$ |                    |                    |
| Plot     | Peak1                                                | Peak2              | Peak3              |
| y0       | 0.23 ± 0.47                                          | 0.23 ± 0.47        | 0.23 ± 0.47        |
| xc       | 121.20 ± 0.40                                        | 208.75 ± 5.97      | 341.49 ± 19.41     |
| w        | 34.45 ± 1.17                                         | 108.09 ± 12.08     | 138.84 ± 22.50     |
| A        | 11223.55 ± 613.86                                    | 16353.42 ± 3157.01 | 10771.91 ± 2792.21 |

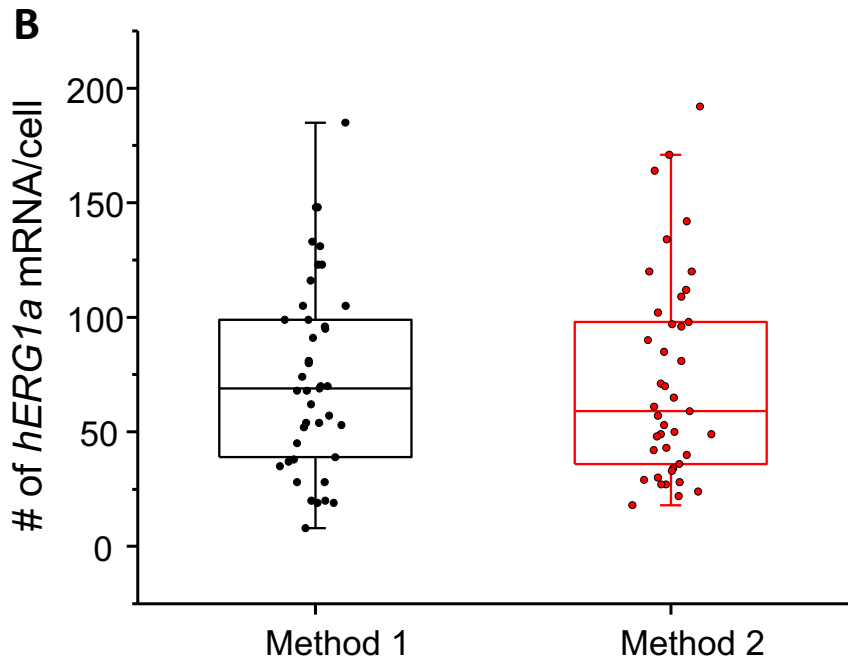

Supplement: supp [file elife-52654-supp-v1.zip]

**A**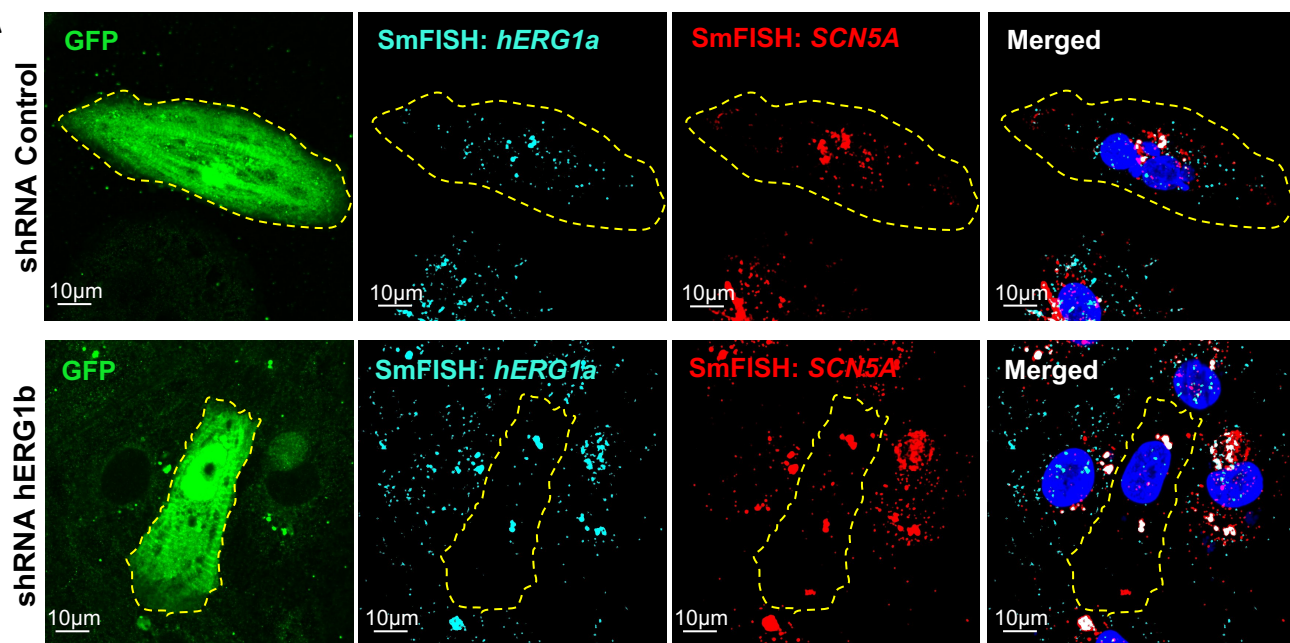**B**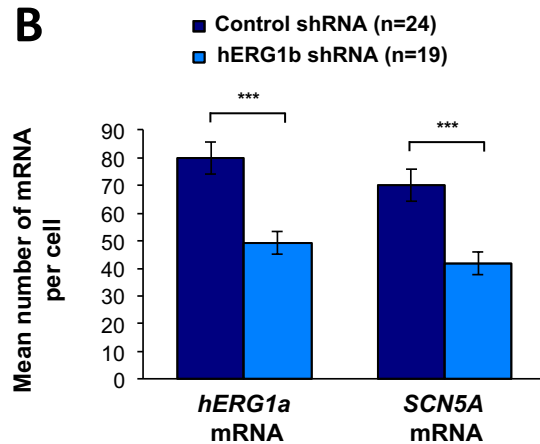**C**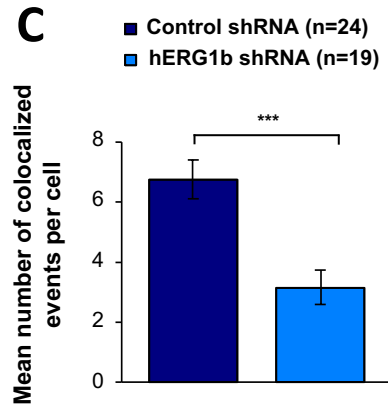

Supplement: supp [file elife-52654-supp-v1.zip]
